# Supplementary material for: Pretreatment with transcutaneous electrical acupoint stimulation to prevent postoperative ileus in patients undergoing laparoscopic colon surgery: study protocol for a randomised controlled trial
Source: PubMed Central journal article supplement — BMJ Open. 2020 Aug 20;10(8):e030694. doi: 10.1136/bmjopen-2019-030694 (PMC7440825; doi:10.1136/bmjopen-2019-030694), 2020-08-20
Supplement: bmjopen-2019-030694.draft_revisions.pdf [file bmjopen-2019-030694.draft_revisions.pdf]

# BMJ Open

BMJ Open is committed to open peer review. As part of this commitment we make the peer review history of every article we publish publicly available.

When an article is published we post the peer reviewers' comments and the authors' responses online. We also post the versions of the paper that were used during peer review. These are the versions that the peer review comments apply to.

The versions of the paper that follow are the versions that were submitted during the peer review process. They are not the versions of record or the final published versions. They should not be cited or distributed as the published version of this manuscript.

BMJ Open is an open access journal and the full, final, typeset and author-corrected version of record of the manuscript is available on our site with no access controls, subscription charges or pay-per-view fees (<http://bmjopen.bmj.com>).

If you have any questions on BMJ Open's open peer review process please email [info.bmjopen@bmj.com](mailto:info.bmjopen@bmj.com)

# BMJ Open

## Transcutaneous electrical acupoint stimulation pretreatment for prevention of postoperative ileus in patients undergoing laparoscopic colon surgery: Study protocol for a randomized controlled trial

|                               |                                                                                                                                                                                                                                                                                                                                                                                                                                                                                                                                                                                                                                                                                                                                                                                                                                                                                                                                                                                                                                                                                                                                                                                                                                                                                                                                                                                                                    |
|-------------------------------|--------------------------------------------------------------------------------------------------------------------------------------------------------------------------------------------------------------------------------------------------------------------------------------------------------------------------------------------------------------------------------------------------------------------------------------------------------------------------------------------------------------------------------------------------------------------------------------------------------------------------------------------------------------------------------------------------------------------------------------------------------------------------------------------------------------------------------------------------------------------------------------------------------------------------------------------------------------------------------------------------------------------------------------------------------------------------------------------------------------------------------------------------------------------------------------------------------------------------------------------------------------------------------------------------------------------------------------------------------------------------------------------------------------------|
| Journal:                      | <i>BMJ Open</i>                                                                                                                                                                                                                                                                                                                                                                                                                                                                                                                                                                                                                                                                                                                                                                                                                                                                                                                                                                                                                                                                                                                                                                                                                                                                                                                                                                                                    |
| Manuscript ID                 | bmjopen-2019-030694                                                                                                                                                                                                                                                                                                                                                                                                                                                                                                                                                                                                                                                                                                                                                                                                                                                                                                                                                                                                                                                                                                                                                                                                                                                                                                                                                                                                |
| Article Type:                 | Protocol                                                                                                                                                                                                                                                                                                                                                                                                                                                                                                                                                                                                                                                                                                                                                                                                                                                                                                                                                                                                                                                                                                                                                                                                                                                                                                                                                                                                           |
| Date Submitted by the Author: | 13-Apr-2019                                                                                                                                                                                                                                                                                                                                                                                                                                                                                                                                                                                                                                                                                                                                                                                                                                                                                                                                                                                                                                                                                                                                                                                                                                                                                                                                                                                                        |
| Complete List of Authors:     | <p>Wang, Jian; Shuguang Hospital Affiliated to Shanghai University of Traditional Chinese Medicine</p> <p>Li, Dongli; Wenzhou Medical University, the sixth Affiliated Hospital, Anesthesiology</p> <p>Tang, Wei; Shuguang Hospital Affiliated to Shanghai University of Traditional Chinese Medicine, Anesthesiology</p> <p>Guo, Jun; Shuguang Hospital Affiliated to Shanghai University of Traditional Chinese Medicine, Anesthesiology</p> <p>Chen, Wenting; Shuguang Hospital Affiliated to Shanghai University of Traditional Chinese Medicine, Anesthesiology</p> <p>Yong, Yue; Shuguang Hospital Affiliated to Shanghai University of Traditional Chinese Medicine, Anesthesiology</p> <p>Yu, Guijie; Shuguang Hospital Affiliated to Shanghai University of Traditional Chinese Medicine, Anesthesiology</p> <p>Feng, Rui; Shuguang Hospital Affiliated to Shanghai University of Traditional Chinese Medicine, Anesthesiology</p> <p>Yuan, Lan; Shuguang Hospital Affiliated to Shanghai University of Traditional Chinese Medicine, Anesthesiology</p> <p>Fu, Guoqiang; Shuguang Hospital Affiliated to Shanghai University of Traditional Chinese Medicine, Anesthesiology</p> <p>Song, Jiangang; Shuguang Hospital Affiliated to Shanghai University of Traditional Chinese Medicine, Anesthesiology</p> <p>Fan, Lihua; Wenzhou Medical University, the sixth Affiliated Hospital, Anesthesiology</p> |
| Keywords:                     | Transcutaneous electrical acupoint stimulation (TEAS), postoperative ileus (POI), Pretreatment                                                                                                                                                                                                                                                                                                                                                                                                                                                                                                                                                                                                                                                                                                                                                                                                                                                                                                                                                                                                                                                                                                                                                                                                                                                                                                                     |
|                               |                                                                                                                                                                                                                                                                                                                                                                                                                                                                                                                                                                                                                                                                                                                                                                                                                                                                                                                                                                                                                                                                                                                                                                                                                                                                                                                                                                                                                    |

SCHOLARONE™  
Manuscripts

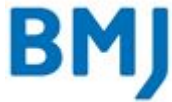

I, the Submitting Author has the right to grant and does grant on behalf of all authors of the Work (as defined in the below author licence), an exclusive licence and/or a non-exclusive licence for contributions from authors who are: i) UK Crown employees; ii) where BMJ has agreed a CC-BY licence shall apply, and/or iii) in accordance with the terms applicable for US Federal Government officers or employees acting as part of their official duties; on a worldwide, perpetual, irrevocable, royalty-free basis to BMJ Publishing Group Ltd ("BMJ") its licensees and where the relevant Journal is co-owned by BMJ to the co-owners of the Journal, to publish the Work in this journal and any other BMJ products and to exploit all rights, as set out in our [licence](#).

The Submitting Author accepts and understands that any supply made under these terms is made by BMJ to the Submitting Author unless you are acting as an employee on behalf of your employer or a postgraduate student of an affiliated institution which is paying any applicable article publishing charge ("APC") for Open Access articles. Where the Submitting Author wishes to make the Work available on an Open Access basis (and intends to pay the relevant APC), the terms of reuse of such Open Access shall be governed by a Creative Commons licence – details of these licences and which [Creative Commons](#) licence will apply to this Work are set out in our licence referred to above.

Other than as permitted in any relevant BMJ Author's Self Archiving Policies, I confirm this Work has not been accepted for publication elsewhere, is not being considered for publication elsewhere and does not duplicate material already published. I confirm all authors consent to publication of this Work and authorise the granting of this licence.

1  
2  
3  
4 1 **Transcutaneous electrical acupoint stimulation pretreatment for prevention of**  
5  
6 2 **postoperative ileus in patients undergoing laparoscopic colon surgery: Study protocol for**  
7  
8 3 **a randomized controlled trial**  
9  
10 4

11 5 Wang, Jian MD<sup>1,#</sup>; Li, Dongli MD<sup>2,#</sup>; Tang, Wei MD<sup>1</sup>; Guo, Jun MD<sup>1</sup>; Chen, Wenting MD<sup>1</sup>;  
12 6 Yong, Yue MD<sup>1</sup>; Yu, Guijie MD<sup>1</sup>; Feng, Rui MD<sup>1</sup>; Yuan, Lan MD<sup>1</sup>; Fu, Guoqiang MD<sup>1</sup>; Song,  
13 7 Jiangang MD<sup>1,\*</sup>; Fan, Lihua MD<sup>2,\*</sup>  
14  
15  
16  
17  
18  
19

20 9 <sup>1</sup>Department of Anesthesiology, Shuguang Hospital Affiliated to Shanghai University of  
21 10 Traditional Chinese Medicine, Shanghai, China  
22  
23

24 11 <sup>2</sup>Department of Anesthesiology, Wenzhou Medical University, the sixth Affiliated Hospital,  
25 12 Lishui 323000, China  
26  
27  
28  
29

30 14 #These authors contributed equally to this work.  
31  
32  
33

34 16 \*Corresponding Author: Li-hua Fan. Department of Anesthesiology, Wenzhou Medical  
35 17 University, the sixth Affiliated Hospital, Lishui 323000, China; Email: flh2222@163.com.  
36 18 Jian-gang Song, Department of Anesthesiology, Shuguang Hospital Affiliated to Shanghai  
37 19 University of Traditional Chinese Medicine, Shanghai 201203, China. email:  
38 20 songjg1993@126.com  
39  
40  
41  
42  
43  
44  
45  
46  
47  
48  
49  
50  
51  
52  
53  
54  
55  
56  
57  
58  
59  
60

1  
2  
3  
4 22 **Abstract**

5 23 **Introduction:** Postoperative ileus (POI) is a common complication after surgery, which  
6  
7 24 severely affects postoperative recovery. It is not clear whether pretreatment with transcutaneous  
8  
9 25 electrical acupoint stimulation (TEAS) can improve recovery of POI. This trial will evaluate  
10  
11 26 the effects of TEAS pretreatment for POI.

12  
13 27 **Methods and analysis:** This will be a prospective, randomized, controlled trial. ASA I-II level  
14  
15 28 patients aged 18-65 years and scheduled for laparoscopic colon surgery will be included. It is  
16  
17 29 planned that 146 subjects will be randomized to the TEAS and sham TEAS (STEAS) groups  
18  
19 30 underwent 2 sessions of TEAS/STEAS treatment daily for 3 days before surgery and a last  
20  
21 31 TEAS/STEAS treatment for 30 minutes before anesthesia. The primary endpoint is the first  
22  
23 32 defecation time. The secondary endpoints include postoperative anal exhaust time,  
24  
25 33 time for dieting, time beginning to walk alone, length of hospital stay, postoperative pain VAS  
26  
27 34 score of the first 3 days after operation, analgesic requirements, complications, inflammatory  
28  
29 35 mediators in blood including IFN- $\beta$ , IFN - $\gamma$ , IL-6, IL-1.

30  
31 36 **Ethics and dissemination:** This study has been approved by the Chinese registered clinical  
32  
33 37 trial ethics review committee (NO.ChiECRCT-20170084). The result of the trial will be  
34  
35 38 published in an internationally peer-reviewed journal.

36  
37 39 **Trial registration:** This study has been registered with the Chinese clinical trial register (NO.  
38  
39 40 ChiCTR-INR-17013184).

40  
41 41 **Trial status:** The study was in the recruitment phase at the time of manuscript submission.

42  
43 42 **Abbreviations:** POI = Postoperative ileus, TCM = traditional Chinese medicine, EA = electro-  
44  
45 43 acupuncture, TEAS = transcutaneous electrical acupoint stimulation, BIS = bispectral index,  
46  
47 44 PACU = post anaesthesia care unit, ERAS= Enhanced Recovery After Surgery.

48  
49 45 **Key words:** Transcutaneous electrical acupoint stimulation (TEAS); postoperative ileus (POI);  
50  
51 46 Pretreatment.  
52  
53  
54  
55  
56  
57  
58  
59  
60

1  
2  
3  
4 47 **Strengths and limitations of the study**

- 5  
6 48 ➤ This study aims to evaluate the influence of pretreatment with transcutaneous electrical  
7  
8 49 acupuncture stimulation (TEAS) in preventing of postoperative ileus (POI) after surgery.  
9  
10 50 ➤ The intervention is simple, non-invasive and easy acceptance therapy.  
11  
12 51 ➤ This study will be possible to verify the mechanism of inflammatory response reduction  
13  
14 52 by TEAS pretreatment in preventing postoperative ileus.  
15  
16 53 ➤ It is a single-center study, the generalization and application may be limited. To reduce  
17  
18 54 this potential bias, large sample, multicenter, multiracial studies are still needed.  
19  
20  
21  
22  
23  
24  
25  
26  
27  
28  
29  
30  
31  
32  
33  
34  
35  
36  
37  
38  
39  
40  
41  
42  
43  
44  
45  
46  
47  
48  
49  
50  
51  
52  
53  
54  
55  
56  
57  
58  
59  
60

## 55 **Introduction**

56 Postoperative ileus (POI) is a transient gastrointestinal propulsion dysfunction following  
57 surgery. It often occurs after abdominal surgery and may also occur following surgery at other  
58 sites [1]. The main symptom is abdominal pain, abdominal distention, nausea, vomiting, stop  
59 exhaust defecation, intolerance to solid food, etc. Postoperative ileus is usually temporary, but  
60 if it prolonged, may lead to surgical incision dehiscence, intestinal anastomotic fistula,  
61 abdominal cavity infection, intestinal ischemia, aspiration pneumonia and other serious  
62 complications [2-4]. A retrospective cohort study involving nearly 500 U.S. hospitals has  
63 shown that postoperative ileus is a key reason for prolonged hospitalization and increased  
64 medical costs for patients with abdominal surgery [1]. The United States spends more than  
65 \$1.46 billion on POI treatments every year [5]. At present, methods used in treatment of  
66 postoperative ileus mainly include: perioperative rational use of narcotic drugs and opioids,  
67 eating as soon as possible, avoidance to use nasogastric tube after operation, early ambulation,  
68 postoperative epidural analgesia, restrict fluid intake, the minimally invasive surgery (such as  
69 laparoscopic), drug therapy, chewing gum, etc. However, despite the numerous treatment  
70 strategies, the current clinical treatment effect is still not ideal. POI is still a difficult clinical  
71 problem that affects the rapid recovery of postoperative patients. It is necessary to find more  
72 effective, convenient and economical treatment methods [6-10].

73 The main mechanism that causes POI may be the activation of macrophages in the external  
74 muscular layer during surgical operation [11]. Intestinal manipulation during operation can  
75 activate the macrophages cells outside layer muscle of small intestine, the cells can release  
76 inflammatory factors (IL-6, IL-1 $\beta$ ) and chemokine (MIP-1 $\alpha$ ), and increase the expression of  
77 adhesion molecules (ICAM-1) on the endothelial cells, induction of neutrophils and monocytes  
78 in the circulation into the small intestine muscle layer. These cells and activating macrophages  
79 can release a large amount of the inducible nitric oxide synthase (iNOS) and prostaglandin,  
80 inhibits the movement and contraction of the gastrointestinal tract in the end[12, 13]. Further,  
81 the inflammatory mediators were migrated with the blood flow, and further activation of  
82 macrophages in the distal gastrointestinal tract caused the whole gastrointestinal paralysis [14].

1  
2  
3  
4 83 It was confirmed by a large number of animal experiments that the reduction of inflammatory  
5  
6 84 response was effective for POI treatment [15-17].  
7

8 85 Clinical doctors of traditional Chinese medicine (TCM) have long history using acupuncture to  
9  
10 86 treat functional gastrointestinal disease. In recent years, doctors around the world have also  
11  
12 87 been increasingly concerned about the significant effect of acupuncture on POI. Therefore, the  
13  
14 88 effect of EA on postoperative ileus is clear and promising. Ng, S.S., *et al.* applied electro-  
15  
16 89 acupuncture (EA) in the treatment postoperative intestinal paralysis of patients under  
17  
18 90 laparoscopic colon surgery [18]. The results showed that compared with patients without  
19  
20 91 electro-acupuncture treatment, the defecation time, length of hospital stay were significantly  
21  
22 92 shortened in the EA group. You, X.M., *et al.* found that significant reduction of the incidence  
23  
24 93 of POI in patients with hepatic resection by acupuncture combined with Chinese herbal  
25  
26 94 medicine, and the time of hospitalization was also significantly shortened ( $14.0\pm 4.9d$  vs  
27  
28 95  $16.5\pm 6.8d$ ,  $P=0.014$ ) [19].  
29

30 96 Our previous studies proved that the pretreatment of acupuncture could regulate the excessive  
31  
32 97 activation of the innate immune system, and inhibit inflammatory response. This effect may be  
33  
34 98 achieved by activating the vagus nerve system [20, 21]. Studies have shown that transcutaneous  
35  
36 99 electrical acupoint stimulation and EA therapy have similar effects in pain treatment and  
37  
38 100 alleviating inflammatory response [22, 23].  
39

40 101 Traditional Chinese medicine holds that the best treatment for disease is precaution. Based on  
41  
42 102 all of the above studies, we hypothesize that using transcutaneous electrical acupoint  
43  
44 103 stimulation (TEAS) as pretreatment, before the operation, may reduce the incidence of  
45  
46 104 postoperative ileus. Until now, there is no research report on this.  
47

48 105 We design this randomized, controlled trial, which intends to find whether the pretreatment of  
49  
50 106 transcutaneous electrical acupoint stimulation can reduce the incidence of postoperative ileus  
51  
52 107 in laparoscopic colon resection patients. Further to verify that this anti-inflammatory effect is  
53  
54 108 associated with the immunomodulation function of TEAS.  
55

56 109  
57

58 110  
59  
60



1  
2  
3  
4 111 **Methods and analysis**

5  
6 112 **Study objective**

7  
8 113 The primary objective is to investigate whether the pretreatment of percutaneous acupuncture  
9  
10 114 can improve gastrointestinal motor function after laparoscopic colon surgery. The secondary  
11  
12 115 objective is to verify the suppression of overactivation of innate immune system and reduction  
13  
14 116 of inflammatory response as the mechanism of pretreatment of percutaneous acupuncture to  
15  
16 117 prevent POI.

17  
18 118 **Study location**

19  
20 119 A prospective, single-centre, single-blinded, randomized, controlled trial will be conducted at  
21  
22 120 Shuguang hospital affiliated to Shanghai university of traditional Chinese medicine, China.

23  
24 121 **Study population**

25  
26 122 Participants will be recruited according to the following inclusion and exclusion criteria.

27  
28 123 **Inclusion criteria**

- 29  
30 124 1. Aged 18 ~ 75 years old male and female patients.  
31  
32 125 2. Patients undergoing laparoscopic descending colon and rectal cancer surgery.  
33  
34 126 3. Weight index BMI 18 to 31 kg/m<sup>2</sup>.  
35  
36 127 4. The ASA is I-II level.  
37  
38 128 5. Patients signed informed consent.

39  
40 129 **Exclusion criteria**

- 41  
42 130 1. The middle and lower segment rectal cancer, the whole colon, complete rectal resection,  
43  
44 131 or need of a complex endoscopic surgery.  
45  
46 132 2. It is necessary for abdominal wall fistula, gastrointestinal fistula or fistula surgery.  
47  
48 133 3. Operation history of abdominal, pelvic or complication.  
49  
50 134 4. Patients to receive epidural or epidural analgesic.  
51  
52 135 5. Patients with skin infections, surgical incision or scar on the point.  
53  
54 136 6. Patients with limbs, spinal surgery or nerve injury.  
55  
56 137 7. Patients participated in other clinical trials or received other acupuncture therapy in the  
57  
58 138 near four weeks.

- 1  
2  
3  
4 139 8. Patients with cardiac pacemakers.  
5  
6 140 9. Patients with preoperative combined pain, patients with central analgesic drugs, opioid  
7  
8 141 addiction, dependents, or patients with a history of alcoholism.  
9  
10 142 10. Patients with preoperative combination of severe central nervous system disease and  
11  
12 143 severe mental illness.

13  
14 144 **Endpoints**

15  
16 145 **Primary endpoint**

17  
18 146 The first defecation time (h): the time to observe the first anal defecation after laparoscopic  
19  
20 147 surgery.

21  
22 148 **Secondary endpoints**

23  
24 149 Postoperative anal exhaust time (h), time that the patients tolerated a solid diet (h), time to walk  
25  
26 150 independently (h), length of hospital stay (d), postoperative pain VAS score day1,day2,day3 (0  
27  
28 151 to 10, 0 points represent entirely painless, 10 points represent the worst pain intensity),  
29  
30 152 postoperative analgesic requirements, postoperative complications, detected inflammatory  
31  
32 153 mediators IFN- $\beta$ , IFN- $\gamma$ , IL-6, IL-1 in blood before TEAS/STEAS intervention and 1d, 3d, 5d  
33  
34 154 after operation respectively.

35  
36 155 **Randomization and blinding**

37  
38 156 Patients were randomized to receive either TEAS or STEAS treatment by stratified  
39  
40 157 randomization according to sex, in a 1:1 ratio (Figure1). According to the computer-generated  
41  
42 158 random sequence, a sealed nonopaque envelope would be opened to determine the group of  
43  
44 159 entry. The acupuncturist was aware of treatment allocation. A nurse anaesthetist as outcome  
45  
46 160 investigator was blinded to the treatment allocation.

47  
48 161  
49  
50  
51  
52  
53  
54  
55  
56  
57  
58  
59  
60

1  
2  
3  
4 162 ***Current sample size justification***

5 163 According to our previous pilot study, mean time to first defecation in the laparoscopic colon  
6  
7 164 surgery was 62±19h. With assumption that the clinically meaningful difference in mean time  
8  
9 165 to first defecation between TEAS and STEAS groups is 1 day or 24 hours, 66 patients in each  
10  
11 166 group were needed to reach a power of 80% and 5% Type I error rate. Suppose the drop-out  
12  
13 167 rate is 10%, a sample size of 146 patients for 2 groups was needed in this study.

14  
15  
16 168 ***Statistical analysis***

17  
18 169 All data will be analysed using SPSS17.0 or other statistical software packages as needed. The  
19  
20 170 statistical methods will include descriptive statistics, the t-test,  $\chi^2$  test, analysis of variance,  
21  
22 171 univariate logistic regression analysis and multivariate linear regression analysis. The  
23  
24 172 significance level will be set at 5%.

25  
26 173 ***Pretreatment***

27  
28 174 The patients randomized to TEAS and STEAS groups underwent 2 sessions of TEAS/STEAS  
29  
30 175 treatment daily for three consecutive days before surgery. And the patients were administered  
31  
32 176 a last TEAS/STEAS treatment for 30 minutes before anesthesia.

33  
34 177 The perioperative management of all patients was standardized. Early ambulation was  
35  
36 178 encouraged. Oral feeding was resumed as early as possible. All patients will be followed up  
37  
38 179 until discharge from the hospital.

39  
40 180 In TEAS group, the acupoints including Zusanli (ST-36), Shangjuxu (ST-37), Hegu (LI-4), and  
41  
42 181 Neiguan (P-6), were identified before electrical stimulation with surface electrodes (Figure 2).

43  
44 182 Selection of these acupoints was based on a consensus between the acupuncturists of the study.

45  
46 183 No electrical stimulation sensation was performed in STEAS group. Electric stimulation was  
47  
48 184 used in TEAS group with the Han's acupoint nerve stimulator (HANS200A, Nanjing Jisheng  
49  
50 185 Medical Technology Co., Ltd., Nanjing, China). Frequency of the electric stimulation was set  
51  
52 186 at 100 Hz. In STEAS group, pseudo-stimulation was provided by deliberately connecting the  
53  
54 187 electrodes to the incorrect output socket of EA device, and thus there was no flow of electric  
55  
56 188 current. Patients could see the output light flashing but no current was transmitted throughout  
57  
58  
59  
60

189 the procedure. Patients were told that the stimulation frequency selected was not perceivable  
190 by human beings. Each session of EA treatment last for 30 minutes.

191 All operations were under general anesthesia, according to standardized anesthesia procedures.  
192 Patients would be fasting for 12 hours before operation. Right upper extremity venous access  
193 would be established before the patients entering the operation room. 8ml/kg of lactate ringer's  
194 was intravenous infusion for compensatory expansion before induction. Patients would then  
195 intravenously receive midazolam (0.04 mg/kg), fentanyl (3  $\mu$ g/kg), vecuronium bromide (0.1  
196 mg/kg), propofol (1.5-2.0mg/kg) for anesthesia induction. Maintaining anesthesia used CP-600  
197 anaesthesia delivery system (Slgo medical technology co., LTD, Beijing, china). Adjustment  
198 of propofol was performed in order to maintain the bispectral index (BIS) reaching 40 ~ 60.  
199 After operation, all patients would be remained in the post anaesthesia care unit (PACU) and  
200 would return to the ward for recovery procedure until discharge.

#### 201 *Adverse events*

202 All adverse reactions would be recorded and closely monitored through spontaneous reports by  
203 patients or direct observation by clinicians or by non-inducing methods to ask patients about  
204 their adverse events. Taking appropriate treatment if necessary. Serious adverse events should  
205 be reported to the ethics committee.

#### 206 *Data collection and management*

207 Demographic variables and clinical data will be collected from all patients. Furthermore, during  
208 the procedure, blood pressure, heart rate and oxygen saturation will be monitored. Any adverse  
209 events will be recorded. Data will be collected throughout the study and will be securely  
210 managed under conditions of confidentiality. Data collection will be performed by a nurse  
211 anaesthetist. The participants will be referred to by their participant number rather than their  
212 name throughout the study unless otherwise specified. All relevant documents and files will be  
213 archived for 5 years. Data can be only accessed by the investigators who sign the confidential  
214 disclosure agreement and by institutional or governmental auditors during the study. Data  
215 without patient identifiers will be publicly accessible after the study. The process will be  
216 monitored by the Institutional Ethics Committee for Clinical Research of Shuguang Hospital.

1  
2  
3  
4 217 ***Patient and public involvement***

5 218 Patient and Public Involvement (PPI) has been considered over the course of the trial design.  
6  
7 219 we organized a Clinical Experience Advisory Panel (CEAP). Our CEAP is made up of staff  
8  
9 220 with expertise in management of complications after abdominal surgery and nursing. CEAP  
10  
11 221 staff will meet twice a year and track the progress of the study and offer advice to the research  
12  
13 222 team. The relationship of CEAP and our research team is coordinated by our hospital clinical  
14  
15 223 trial management committee. Patients will be invited to request study results if interested.  
16  
17

18 224 **Discussion**

19  
20 225 Prevention of postoperative bowel paralysis is of great importance to reduce perioperative  
21  
22 226 complications and reduce hospitalization costs. It has been proved that acupuncture and EA can  
23  
24 227 effectively treat postoperative bowel paralysis and shorten the time of POI. However, there are  
25  
26 228 few studies on whether the pretreatment of TEAS can prevent POI. Previous studies have  
27  
28 229 shown that TEAS are similar to handle acupuncture and EA in pain treatment, reducing  
29  
30 230 inflammation and so on.

31  
32 231 It is necessary to verify the efficacy and effectiveness of POI prevention by using  
33  
34 232 TEAS through clinical trial. This study will evaluate on the occurrence of POI for patients after  
35  
36 233 using pretreatment with TEAS. There are still some limitations to this study. This study is a  
37  
38 234 single-centre trial, and therapeutic effect of TEAS may be ethnic and regional, so it is necessary  
39  
40 235 to conduct multi-center and large sample study in future. In addition, it is difficult to apply the  
41  
42 236 blind method to the treatment of TEAS, which is hard to distinguish the psychological factors  
43  
44 237 and placebo effect of the patients, and more methodological improvements are needed.

45  
46 238 TEAS is treatment that combines percutaneous neurostimulation therapy and acupuncture point  
47  
48 239 together. In comparison with EA or acupuncture, it has the advantages of non-invasive, simple  
49  
50 240 operation and easy acceptance. The successful implementation of our clinical trial will help  
51  
52 241 provide an effective technical means for improving gastrointestinal function recovery in  
53  
54 242 patients undergoing laparoscopic surgery. It can provide optimized option for postoperative  
55  
56 243 rehabilitation treatment such as Enhanced Recovery After Surgery (ERAS). In particular, it can  
57  
58 244 also decrease the economic burden of intensive care units as well as recovery institutions.  
59  
60

1  
2  
3  
4 245 ***Acknowledgements***

5  
6 246 We thank Dr. Stanley Tao from Shanghai Ruihui Biotech for his valuable assistance in the  
7  
8 247 statistical design of this study.

9  
10 248 ***Funding***

11  
12 249 The present study is supported by the project of the National Natural Science Foundation of  
13  
14 250 China (No. 81703898) and the commercial sponsorship of SINCH Pharmaceuticals Tech. Co.,  
15  
16 251 Ltd.

17  
18 252 ***Availability of data and materials***

19  
20 253 The dataset to be generated during the present designed study will be available from the  
21  
22 254 corresponding author on reasonable request via email.

23  
24 255 ***Authors' contributions***

25  
26 256 Jian Wang conceived of the study. Dong-li Li, Wei Tang, Jun Guo and Guo-qiang Fu  
27  
28 257 participated in its design and coordination. Wen-ting Chen, Yue Yong and Jun Guo collected  
29  
30 258 references and developed the protocol. Gui-jie Yu and Lan Yuan will perform statistics analysis.  
31  
32 259 Rui Feng will follow up patients and record data. Jian Wang, Li-hua Fan and Jian-gang Song  
33  
34 260 drafted the manuscript. All authors read and approved the final manuscript.

35  
36 261 ***Competing interests***

37  
38 262 The authors declare that they have no competing interests.

39  
40 263  
41  
42  
43  
44  
45  
46  
47  
48  
49  
50  
51  
52  
53  
54  
55  
56  
57  
58  
59  
60

264 **References**

- 265 1. Iyer S, Saunders WB, Stemkowski S: Economic burden of postoperative ileus associated  
266 with colectomy in the United States. *Journal of managed care pharmacy : JMCP* 2009,  
267 15(6):485-494.
- 268 2. Boelens PG, Heesakkers FF, Luyer MD, van Barneveld KW, de Hingh IH,  
269 Nieuwenhuijzen GA, Roos AN, Rutten HJ: Reduction of postoperative ileus by early  
270 enteral nutrition in patients undergoing major rectal surgery: prospective, randomized,  
271 controlled trial. *Annals of Surgery* 2014, 259(4):649-655.
- 272 3. Melis M, Fichera A, Ferguson MK: Bowel necrosis associated with early jejunal tube  
273 feeding: A complication of postoperative enteral nutrition. *Arch Surg* 2006, 141(7):701-  
274 704.
- 275 4. Moghadamyeghaneh Z, Hwang GS, Hanna MH, Phelan M, Carmichael JC, Mills S,  
276 Pigazzi A, Stamos MJ: Risk factors for prolonged ileus following colon surgery. *Surgical*  
277 *endoscopy* 2016, 30(2):603-609.
- 278 5. Goldstein JL, Matuszewski KA, Delaney CP, Senagore A, Chiao EF, Shah M, Meyer K,  
279 Bramley T: Inpatient Economic Burden of Postoperative Ileus Associated with Abdominal  
280 Surgery in the United States. *P & T* 2007, 32.
- 281 6. Bragg D, El-Sharkawy AM, Psaltis E, Maxwell-Armstrong CA, Lobo DN: Postoperative  
282 ileus: Recent developments in pathophysiology and management. *Clin Nutr* 2015,  
283 34(3):367-376.
- 284 7. Wolthuis AM, Bislenghi G, Fieuws S, de Buck van Overstraeten A, Boeckxstaens G,  
285 D'Hoore A: Incidence of prolonged postoperative ileus after colorectal surgery: a  
286 systematic review and meta-analysis. *Colorectal disease : the official journal of the*  
287 *Association of Coloproctology of Great Britain and Ireland* 2016, 18(1):O1-9.
- 288 8. Nguyen DL, Maithel S, Nguyen ET, Bechtold ML: Does alvimopan enhance return of  
289 bowel function in laparoscopic gastrointestinal surgery? A meta-analysis. *Annals of*  
290 *gastroenterology* 2015, 28(4):475-480.

- 1  
2  
3  
4 291 9. van Bree SH, Nemethova A, Cailotto C, Gomez-Pinilla PJ, Matteoli G, Boeckxstaens GE:  
5  
6 292 New therapeutic strategies for postoperative ileus. *Nature reviews Gastroenterology &*  
7  
8 293 *hepatology* 2012, 9(11):675-683.
- 9  
10 294 10. Hilton WM, Lotan Y, Parekh DJ, Basler JW, Svatek RS: Alvimopan for prevention of  
11  
12 295 postoperative paralytic ileus in radical cystectomy patients: a cost-effectiveness analysis.  
13  
14 296 *BJU international* 2013, 111(7):1054-1060.
- 15  
16 297 11. Wehner S, Behrendt FF, Lyutenski BN, Lysson M, Bauer AJ, Hirner A, Kalff JC:  
17  
18 298 Inhibition of macrophage function prevents intestinal inflammation and postoperative ileus  
19  
20 299 in rodents. *Gut* 2007, 56(2):176-185.
- 21  
22 300 12. Wehner S, Straesser S, Vilz TO, Pantelis D, Sielecki T, de la Cruz VF, Hirner A, Kalff JC:  
23  
24 301 Inhibition of p38 mitogen-activated protein kinase pathway as prophylaxis of  
25  
26 302 postoperative ileus in mice. *Gastroenterology* 2009, 136(2):619-629.
- 27  
28 303 13. Schwarz NT, Kalff JC, Turler A, Engel BM, Watkins SC, Billiar TR, Bauer AJ: Prostanoid  
29  
30 304 production via COX-2 as a causative mechanism of rodent postoperative ileus.  
31  
32 305 *Gastroenterology* 2001, 121(6):1354-1371.
- 33  
34 306 14. Engel DR, Koscielny A, Wehner S, Maurer J, Schiwon M, Franken L, Schumak B, Limmer  
35  
36 307 A, Sparwasser T, Hirner A *et al*: T helper type 1 memory cells disseminate postoperative  
37  
38 308 ileus over the entire intestinal tract. *Nature medicine* 2010, 16(12):1407-1413.
- 39  
40 309 15. Adding LC, Bannenberg GL, Gustafsson LE: Basic experimental studies and clinical  
41  
42 310 aspects of gadolinium salts and chelates. *Cardiovascular drug reviews* 2001, 19(1):41-56.
- 43  
44 311 16. Mikkelsen HB, Thuneberg L: Op/op mice defective in production of functional colony-  
45  
46 312 stimulating factor-1 lack macrophages in muscularis externa of the small intestine. *Cell*  
47  
48 313 *and tissue research* 1999, 295(3):485-493.
- 49  
50 314 17. Koscielny A, Kalff JC: T-helper cell type 1 memory cells and postoperative ileus in the  
51  
52 315 entire gut. *Current opinion in gastroenterology* 2011, 27(6):509-514.
- 53  
54 316 18. Ng SS, Leung WW, Mak TW, Hon SS, Li JC, Wong CY, Tsoi KK, Lee JF:  
55  
56 317 Electroacupuncture reduces duration of postoperative ileus after laparoscopic surgery for  
57  
58 318 colorectal cancer. *Gastroenterology* 2013, 144(2):307.



- 1  
2  
3  
4 319 19. You XM, Mo XS, Ma L, Zhong JH, Qin HG, Lu Z, Xiang BD, Wu FX, Zhao XH, Tang J  
5 320 *et al*: Randomized Clinical Trial Comparing Efficacy of Simo Decoction and Acupuncture  
6 321 or Chewing Gum Alone on Postoperative Ileus in Patients With Hepatocellular Carcinoma  
7 322 After Hepatectomy. *Medicine* 2015, 94(45):e1968.
- 11 323 20. Song JG, Li HH, Cao YF, Lv X, Zhang P, Li YS, Zheng YJ, Li Q, Yin PH, Song SL *et al*:  
13 324 Electroacupuncture improves survival in rats with lethal endotoxemia via the autonomic  
15 325 nervous system. *Anesthesiology* 2012, 116(2):406-414.
- 18 326 21. Zhang J, Yong Y, Li X, Hu Y, Wang J, Wang YQ, Song W, Chen WT, Xie J, Chen XM  
19 327 *et al*: Vagal modulation of high mobility group box-1 protein mediates electroacupuncture-  
21 328 induced cardioprotection in ischemia-reperfusion injury. *Scientific reports* 2015, 5:15503.
- 24 329 22. Balogun JA, Biasci S, Han L: The effects of acupuncture, electroneedling and  
25 330 transcutaneous electrical stimulation therapies on peripheral haemodynamic functioning.  
27 331 *Disability and rehabilitation* 1998, 20(2):41-48.
- 30 332 23. Jiang Y, Wang H, Liu Z, Dong Y, Xiang X, Bai L, Tian J, Wu L, Han J, Cui C:  
31 333 Manipulation of and sustained effects on the human brain induced by different modalities  
32 334 of acupuncture: an fMRI study. *PloS one* 2013, 8(6):e66815.

36 335

37 336

38 337

39 338

40 339

41 340

42 341

43 342

44 343

45 344

46 345

47 346

48 347

49 348

50 349

51 350

1  
2  
3  
4 344 **Figure Legend**

5 345 Figure 1. Flow chart of the study

6  
7 346 Figure 2. Acupoints selected in this trial. (a) shows he gu (IL-4), neiguan(P-6). (b) shows zu

8  
9 347 sanli(ST-36), Shang juxu(ST-37). (c) Han's acupoint nerve stimulator.  
10  
11  
12  
13  
14  
15  
16  
17  
18  
19  
20  
21  
22  
23  
24  
25  
26  
27  
28  
29  
30  
31  
32  
33  
34  
35  
36  
37  
38  
39  
40  
41  
42  
43  
44  
45  
46  
47  
48  
49  
50  
51  
52  
53  
54  
55  
56  
57  
58  
59  
60

For peer review only

1  
2  
3  
4  
5  
6  
7  
8  
9  
10  
11  
12  
13  
14  
15  
16  
17  
18  
19  
20  
21  
22  
23  
24  
25  
26  
27  
28  
29  
30  
31  
32  
33  
34  
35  
36  
37  
38  
39  
40  
41  
42  
43  
44  
45  
46  
47  
48  
49  
50  
51  
52  
53  
54  
55  
56  
57  
58  
59  
60

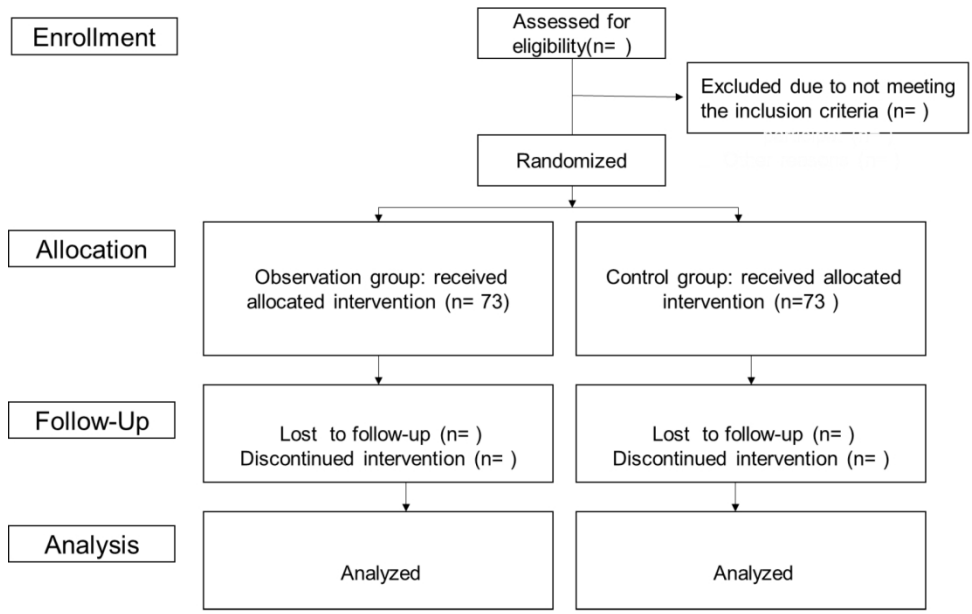

Figure 1. Flow chart of the study

177x109mm (300 x 300 DPI)

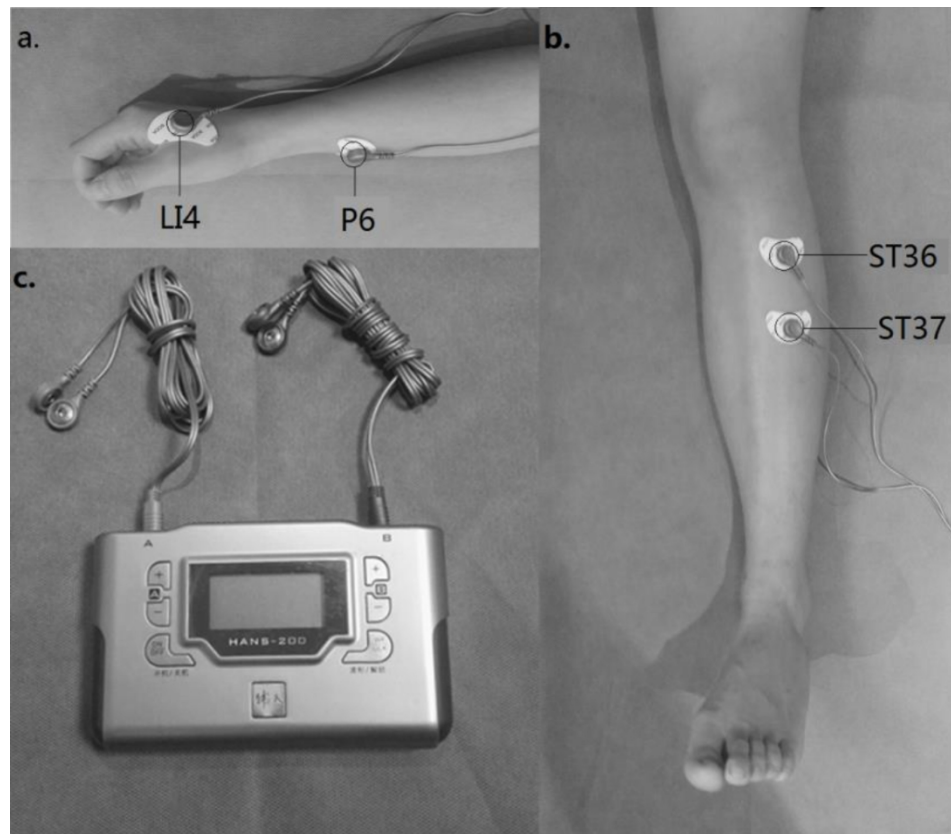

Figure 2. Acupoints selected in this trial. (a) shows he gu (IL-4), neiguan(P-6). (b) shows zu sanli(ST-36), Shang juxu(ST-37). (c) Han's acupoint nerve stimulator.

103x87mm (300 x 300 DPI)

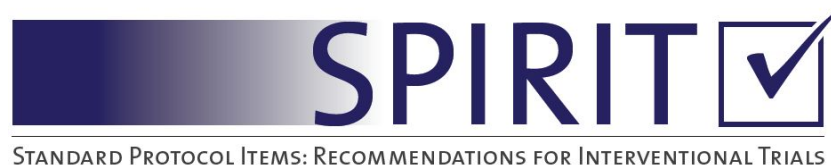

STANDARD PROTOCOL ITEMS: RECOMMENDATIONS FOR INTERVENTIONAL TRIALS

SPIRIT 2013 Checklist for the ReTrain pilot RCT: Recommended items to address in a clinical trial protocol and related documents\*

| Section/item                      | Item No | Description                                                                                                                                                                                                                                                                              | Addressed on page number |
|-----------------------------------|---------|------------------------------------------------------------------------------------------------------------------------------------------------------------------------------------------------------------------------------------------------------------------------------------------|--------------------------|
| <b>Administrative information</b> |         |                                                                                                                                                                                                                                                                                          |                          |
| Title                             | 1       | Descriptive title identifying the study design, population, interventions, and, if applicable, trial acronym                                                                                                                                                                             | _____ 1 _____            |
| Trial registration                | 2a      | Trial identifier and registry name. If not yet registered, name of intended registry                                                                                                                                                                                                     | _____ 2 _____            |
|                                   | 2b      | All items from the World Health Organization Trial Registration Data Set                                                                                                                                                                                                                 | _____ 2 _____            |
| Protocol version                  | 3       | Date and version identifier                                                                                                                                                                                                                                                              | _____ 2 _____            |
| Funding                           | 4       | Sources and types of financial, material, and other support                                                                                                                                                                                                                              | _____ 11 _____           |
| Roles and responsibilities        | 5a      | Names, affiliations, and roles of protocol contributors                                                                                                                                                                                                                                  | _____ 1&11 _____         |
|                                   | 5b      | Name and contact information for the trial sponsor                                                                                                                                                                                                                                       | _____ 11 _____           |
|                                   | 5c      | Role of study sponsor and funders, if any, in study design; collection, management, analysis, and interpretation of data; writing of the report; and the decision to submit the report for publication, including whether they will have ultimate authority over any of these activities | _____ 11 _____           |
|                                   | 5d      | Composition, roles, and responsibilities of the coordinating centre, steering committee, endpoint adjudication committee, data management team, and other individuals or groups overseeing the trial, if applicable (see Item 21a for data monitoring committee)                         | _____ 9 _____            |

1 **Introduction**

2

3 Background and rationale 6a Description of research question and justification for undertaking the trial, including summary of relevant studies (published and unpublished) examining benefits and harms for each intervention 4&5

4

5

6 6b Explanation for choice of comparators \_\_\_\_\_

7

8 Objectives 7 Specific objectives or hypotheses 5

9

10 Trial design 8 Description of trial design including type of trial (eg, parallel group, crossover, factorial, single group), allocation ratio, and framework (eg, superiority, equivalence, noninferiority, exploratory) 5

11

12

13

14 **Methods: Participants, interventions, and outcomes**

15

16 Study setting 9 Description of study settings (eg, community clinic, academic hospital) and list of countries where data will be collected. Reference to where list of study sites can be obtained 6

17

18

19 Eligibility criteria 10 Inclusion and exclusion criteria for participants. If applicable, eligibility criteria for study centres and individuals who will perform the interventions (eg, surgeons, psychotherapists) 6

20

21

22 Interventions 11a Interventions for each group with sufficient detail to allow replication, including how and when they will be administered 8&9

23

24

25 11b Criteria for discontinuing or modifying allocated interventions for a given trial participant (eg, drug dose change in response to harms, participant request, or improving/worsening disease) \_\_\_\_\_

26

27

28 11c Strategies to improve adherence to intervention protocols, and any procedures for monitoring adherence (eg, drug tablet return, laboratory tests) \_\_\_\_\_

29

30

31 11d Relevant concomitant care and interventions that are permitted or prohibited during the trial \_\_\_\_\_

32

33

34 Outcomes 12 Primary, secondary, and other outcomes, including the specific measurement variable (eg, systolic blood pressure), analysis metric (eg, change from baseline, final value, time to event), method of aggregation (eg, median, proportion), and time point for each outcome. Explanation of the clinical relevance of chosen efficacy and harm outcomes is strongly recommended 7

35

36

37

38

39

40 Participant timeline 13 Time schedule of enrolment, interventions (including any run-ins and washouts), assessments, and visits for participants. A schematic diagram is highly recommended (see Figure) 7

41

42

43

44

45

46

1 Sample size 14 Estimated number of participants needed to achieve study objectives and how it was determined, including \_\_\_\_\_ 8 \_\_\_\_\_  
 2 clinical and statistical assumptions supporting any sample size calculations

3  
 4 Recruitment 15 Strategies for achieving adequate participant enrolment to reach target sample size \_\_\_\_\_ 8 \_\_\_\_\_  
 5

6 **Methods: Assignment of interventions (for controlled trials)**

7  
 8 Allocation:

9  
 10 Sequence 16a Method of generating the allocation sequence (eg, computer-generated random numbers), and list of any \_\_\_\_\_ 7 \_\_\_\_\_  
 11 generation factors for stratification. To reduce predictability of a random sequence, details of any planned restriction  
 12 (eg, blocking) should be provided in a separate document that is unavailable to those who enrol participants  
 13 or assign interventions  
 14

15  
 16 Allocation 16b Mechanism of implementing the allocation sequence (eg, central telephone; sequentially numbered, \_\_\_\_\_ 7 \_\_\_\_\_  
 17 concealment opaque, sealed envelopes), describing any steps to conceal the sequence until interventions are assigned  
 18 mechanism  
 19

20 Implementation 16c Who will generate the allocation sequence, who will enrol participants, and who will assign participants to \_\_\_\_\_ 7 \_\_\_\_\_  
 21 interventions  
 22

23  
 24 Blinding (masking) 17a Who will be blinded after assignment to interventions (eg, trial participants, care providers, outcome \_\_\_\_\_ 7 \_\_\_\_\_  
 25 assessors, data analysts), and how  
 26

27 17b If blinded, circumstances under which unblinding is permissible, and procedure for revealing a participant's \_\_\_\_\_ 7 \_\_\_\_\_  
 28 allocated intervention during the trial  
 29

30  
 31 **Methods: Data collection, management, and analysis**

32  
 33 Data collection 18a Plans for assessment and collection of outcome, baseline, and other trial data, including any related \_\_\_\_\_ 9 \_\_\_\_\_  
 34 methods processes to promote data quality (eg, duplicate measurements, training of assessors) and a description of  
 35 study instruments (eg, questionnaires, laboratory tests) along with their reliability and validity, if known.  
 36 Reference to where data collection forms can be found, if not in the protocol  
 37

38  
 39 18b Plans to promote participant retention and complete follow-up, including list of any outcome data to be \_\_\_\_\_ 9 \_\_\_\_\_  
 40 collected for participants who discontinue or deviate from intervention protocols  
 41

|    |                                 |     |                                                                                                                                                                                                                                                                                                                                       |    |
|----|---------------------------------|-----|---------------------------------------------------------------------------------------------------------------------------------------------------------------------------------------------------------------------------------------------------------------------------------------------------------------------------------------|----|
| 1  | Data management                 | 19  | Plans for data entry, coding, security, and storage, including any related processes to promote data quality (eg, double data entry; range checks for data values). Reference to where details of data management procedures can be found, if not in the protocol                                                                     | 9  |
| 2  |                                 |     |                                                                                                                                                                                                                                                                                                                                       |    |
| 3  |                                 |     |                                                                                                                                                                                                                                                                                                                                       |    |
| 4  |                                 |     |                                                                                                                                                                                                                                                                                                                                       |    |
| 5  | Statistical methods             | 20a | Statistical methods for analysing primary and secondary outcomes. Reference to where other details of the statistical analysis plan can be found, if not in the protocol                                                                                                                                                              | 8  |
| 6  |                                 |     |                                                                                                                                                                                                                                                                                                                                       |    |
| 7  |                                 |     |                                                                                                                                                                                                                                                                                                                                       |    |
| 8  |                                 | 20b | Methods for any additional analyses (eg, subgroup and adjusted analyses)                                                                                                                                                                                                                                                              | 8  |
| 9  |                                 |     |                                                                                                                                                                                                                                                                                                                                       |    |
| 10 |                                 | 20c | Definition of analysis population relating to protocol non-adherence (eg, as randomised analysis), and any statistical methods to handle missing data (eg, multiple imputation)                                                                                                                                                       | 8  |
| 11 |                                 |     |                                                                                                                                                                                                                                                                                                                                       |    |
| 12 |                                 |     |                                                                                                                                                                                                                                                                                                                                       |    |
| 13 |                                 |     |                                                                                                                                                                                                                                                                                                                                       |    |
| 14 | <b>Methods: Monitoring</b>      |     |                                                                                                                                                                                                                                                                                                                                       |    |
| 15 |                                 |     |                                                                                                                                                                                                                                                                                                                                       |    |
| 16 | Data monitoring                 | 21a | Composition of data monitoring committee (DMC); summary of its role and reporting structure; statement of whether it is independent from the sponsor and competing interests; and reference to where further details about its charter can be found, if not in the protocol. Alternatively, an explanation of why a DMC is not needed | 9  |
| 17 |                                 |     |                                                                                                                                                                                                                                                                                                                                       |    |
| 18 |                                 |     |                                                                                                                                                                                                                                                                                                                                       |    |
| 19 |                                 |     |                                                                                                                                                                                                                                                                                                                                       |    |
| 20 |                                 |     |                                                                                                                                                                                                                                                                                                                                       |    |
| 21 |                                 |     |                                                                                                                                                                                                                                                                                                                                       |    |
| 22 |                                 | 21b | Description of any interim analyses and stopping guidelines, including who will have access to these interim results and make the final decision to terminate the trial                                                                                                                                                               | 9  |
| 23 |                                 |     |                                                                                                                                                                                                                                                                                                                                       |    |
| 24 |                                 |     |                                                                                                                                                                                                                                                                                                                                       |    |
| 25 | Harms                           | 22  | Plans for collecting, assessing, reporting, and managing solicited and spontaneously reported adverse events and other unintended effects of trial interventions or trial conduct                                                                                                                                                     | 9  |
| 26 |                                 |     |                                                                                                                                                                                                                                                                                                                                       |    |
| 27 |                                 |     |                                                                                                                                                                                                                                                                                                                                       |    |
| 28 | Auditing                        | 23  | Frequency and procedures for auditing trial conduct, if any, and whether the process will be independent from investigators and the sponsor                                                                                                                                                                                           | 10 |
| 29 |                                 |     |                                                                                                                                                                                                                                                                                                                                       |    |
| 30 |                                 |     |                                                                                                                                                                                                                                                                                                                                       |    |
| 31 |                                 |     |                                                                                                                                                                                                                                                                                                                                       |    |
| 32 | <b>Ethics and dissemination</b> |     |                                                                                                                                                                                                                                                                                                                                       |    |
| 33 |                                 |     |                                                                                                                                                                                                                                                                                                                                       |    |
| 34 | Research ethics approval        | 24  | Plans for seeking research ethics committee/institutional review board (REC/IRB) approval                                                                                                                                                                                                                                             | 2  |
| 35 |                                 |     |                                                                                                                                                                                                                                                                                                                                       |    |
| 36 |                                 |     |                                                                                                                                                                                                                                                                                                                                       |    |
| 37 | Protocol amendments             | 25  | Plans for communicating important protocol modifications (eg, changes to eligibility criteria, outcomes, analyses) to relevant parties (eg, investigators, REC/IRBs, trial participants, trial registries, journals, regulators)                                                                                                      | 10 |
| 38 |                                 |     |                                                                                                                                                                                                                                                                                                                                       |    |
| 39 |                                 |     |                                                                                                                                                                                                                                                                                                                                       |    |
| 40 |                                 |     |                                                                                                                                                                                                                                                                                                                                       |    |
| 41 |                                 |     |                                                                                                                                                                                                                                                                                                                                       |    |
| 42 |                                 |     |                                                                                                                                                                                                                                                                                                                                       |    |



|    |                               |     |                                                                                                                                                                                                                                                                                     |              |
|----|-------------------------------|-----|-------------------------------------------------------------------------------------------------------------------------------------------------------------------------------------------------------------------------------------------------------------------------------------|--------------|
| 1  | Consent or assent             | 26a | Who will obtain informed consent or assent from potential trial participants or authorised surrogates, and how (see Item 32)                                                                                                                                                        | _____6_____  |
| 2  |                               |     |                                                                                                                                                                                                                                                                                     |              |
| 3  |                               |     |                                                                                                                                                                                                                                                                                     |              |
| 4  |                               | 26b | Additional consent provisions for collection and use of participant data and biological specimens in ancillary studies, if applicable                                                                                                                                               | _____6_____  |
| 5  |                               |     |                                                                                                                                                                                                                                                                                     |              |
| 6  |                               |     |                                                                                                                                                                                                                                                                                     |              |
| 7  | Confidentiality               | 27  | How personal information about potential and enrolled participants will be collected, shared, and maintained in order to protect confidentiality before, during, and after the trial                                                                                                | _____9_____  |
| 8  |                               |     |                                                                                                                                                                                                                                                                                     |              |
| 9  |                               |     |                                                                                                                                                                                                                                                                                     |              |
| 10 | Declaration of interests      | 28  | Financial and other competing interests for principal investigators for the overall trial and each study site                                                                                                                                                                       | _____11_____ |
| 11 |                               |     |                                                                                                                                                                                                                                                                                     |              |
| 12 |                               |     |                                                                                                                                                                                                                                                                                     |              |
| 13 | Access to data                | 29  | Statement of who will have access to the final trial dataset, and disclosure of contractual agreements that limit such access for investigators                                                                                                                                     | _____9_____  |
| 14 |                               |     |                                                                                                                                                                                                                                                                                     |              |
| 15 |                               |     |                                                                                                                                                                                                                                                                                     |              |
| 16 | Ancillary and post-trial care | 30  | Provisions, if any, for ancillary and post-trial care, and for compensation to those who suffer harm from trial participation                                                                                                                                                       | _____9_____  |
| 17 |                               |     |                                                                                                                                                                                                                                                                                     |              |
| 18 |                               |     |                                                                                                                                                                                                                                                                                     |              |
| 19 |                               |     |                                                                                                                                                                                                                                                                                     |              |
| 20 | Dissemination policy          | 31a | Plans for investigators and sponsor to communicate trial results to participants, healthcare professionals, the public, and other relevant groups (eg, via publication, reporting in results databases, or other data sharing arrangements), including any publication restrictions | _____2_____  |
| 21 |                               |     |                                                                                                                                                                                                                                                                                     |              |
| 22 |                               |     |                                                                                                                                                                                                                                                                                     |              |
| 23 |                               |     |                                                                                                                                                                                                                                                                                     |              |
| 24 |                               | 31b | Authorship eligibility guidelines and any intended use of professional writers                                                                                                                                                                                                      | _____2_____  |
| 25 |                               |     |                                                                                                                                                                                                                                                                                     |              |
| 26 |                               | 31c | Plans, if any, for granting public access to the full protocol, participant-level dataset, and statistical code                                                                                                                                                                     | _____2_____  |
| 27 |                               |     |                                                                                                                                                                                                                                                                                     |              |
| 28 |                               |     |                                                                                                                                                                                                                                                                                     |              |
| 29 | <b>Appendices</b>             |     |                                                                                                                                                                                                                                                                                     |              |
| 30 |                               |     |                                                                                                                                                                                                                                                                                     |              |
| 31 | Informed consent materials    | 32  | Model consent form and other related documentation given to participants and authorised surrogates                                                                                                                                                                                  | _____NA_____ |
| 32 |                               |     |                                                                                                                                                                                                                                                                                     |              |
| 33 |                               |     |                                                                                                                                                                                                                                                                                     |              |
| 34 | Biological specimens          | 33  | Plans for collection, laboratory evaluation, and storage of biological specimens for genetic or molecular analysis in the current trial and for future use in ancillary studies, if applicable                                                                                      | _____NA_____ |
| 35 |                               |     |                                                                                                                                                                                                                                                                                     |              |
| 36 |                               |     |                                                                                                                                                                                                                                                                                     |              |

37 \*It is strongly recommended that this checklist be read in conjunction with the SPIRIT 2013 Explanation & Elaboration for important clarification on the items.  
 38 Amendments to the protocol should be tracked and dated. The SPIRIT checklist is copyrighted by the SPIRIT Group under the Creative Commons  
 39 “[Attribution-NonCommercial-NoDerivs 3.0 Unported](https://creativecommons.org/licenses/by-nc-nd/3.0/)” license.  
 40  
 41  
 42

# BMJ Open

## Pretreatment with transcutaneous electrical acupoint stimulation to prevent postoperative ileus in patients undergoing laparoscopic colon surgery: study protocol for a randomized controlled trial

|                                 |                                                                                                                                                                                                                                                                                                                                                                                                                                                                                                                                                                                                                                                                                                                                                                                                                                                                                                                                                                                                                                                                                                                                                                                                                                                                                                                                                                                                                    |
|---------------------------------|--------------------------------------------------------------------------------------------------------------------------------------------------------------------------------------------------------------------------------------------------------------------------------------------------------------------------------------------------------------------------------------------------------------------------------------------------------------------------------------------------------------------------------------------------------------------------------------------------------------------------------------------------------------------------------------------------------------------------------------------------------------------------------------------------------------------------------------------------------------------------------------------------------------------------------------------------------------------------------------------------------------------------------------------------------------------------------------------------------------------------------------------------------------------------------------------------------------------------------------------------------------------------------------------------------------------------------------------------------------------------------------------------------------------|
| Journal:                        | <i>BMJ Open</i>                                                                                                                                                                                                                                                                                                                                                                                                                                                                                                                                                                                                                                                                                                                                                                                                                                                                                                                                                                                                                                                                                                                                                                                                                                                                                                                                                                                                    |
| Manuscript ID                   | bmjopen-2019-030694.R1                                                                                                                                                                                                                                                                                                                                                                                                                                                                                                                                                                                                                                                                                                                                                                                                                                                                                                                                                                                                                                                                                                                                                                                                                                                                                                                                                                                             |
| Article Type:                   | Protocol                                                                                                                                                                                                                                                                                                                                                                                                                                                                                                                                                                                                                                                                                                                                                                                                                                                                                                                                                                                                                                                                                                                                                                                                                                                                                                                                                                                                           |
| Date Submitted by the Author:   | 03-Dec-2019                                                                                                                                                                                                                                                                                                                                                                                                                                                                                                                                                                                                                                                                                                                                                                                                                                                                                                                                                                                                                                                                                                                                                                                                                                                                                                                                                                                                        |
| Complete List of Authors:       | <p>Wang, Jian; Shuguang Hospital Affiliated to Shanghai University of Traditional Chinese Medicine</p> <p>Li, Dongli; Wenzhou Medical University, the sixth Affiliated Hospital, Anesthesiology</p> <p>Tang, Wei; Shuguang Hospital Affiliated to Shanghai University of Traditional Chinese Medicine, Anesthesiology</p> <p>Guo, Jun; Shuguang Hospital Affiliated to Shanghai University of Traditional Chinese Medicine, Anesthesiology</p> <p>Chen, Wenting; Shuguang Hospital Affiliated to Shanghai University of Traditional Chinese Medicine, Anesthesiology</p> <p>Yong, Yue; Shuguang Hospital Affiliated to Shanghai University of Traditional Chinese Medicine, Anesthesiology</p> <p>Yu, Guijie; Shuguang Hospital Affiliated to Shanghai University of Traditional Chinese Medicine, Anesthesiology</p> <p>Feng, Rui; Shuguang Hospital Affiliated to Shanghai University of Traditional Chinese Medicine, Anesthesiology</p> <p>Yuan, Lan; Shuguang Hospital Affiliated to Shanghai University of Traditional Chinese Medicine, Anesthesiology</p> <p>Fu, Guoqiang; Shuguang Hospital Affiliated to Shanghai University of Traditional Chinese Medicine, Anesthesiology</p> <p>Song, Jiangang; Shuguang Hospital Affiliated to Shanghai University of Traditional Chinese Medicine, Anesthesiology</p> <p>Fan, Lihua; Wenzhou Medical University, the sixth Affiliated Hospital, Anesthesiology</p> |
| <b>Primary Subject Heading</b>: | Complementary medicine                                                                                                                                                                                                                                                                                                                                                                                                                                                                                                                                                                                                                                                                                                                                                                                                                                                                                                                                                                                                                                                                                                                                                                                                                                                                                                                                                                                             |
| Secondary Subject Heading:      | Anaesthesia, Gastroenterology and hepatology, Surgery                                                                                                                                                                                                                                                                                                                                                                                                                                                                                                                                                                                                                                                                                                                                                                                                                                                                                                                                                                                                                                                                                                                                                                                                                                                                                                                                                              |
| Keywords:                       | Transcutaneous electrical acupoint stimulation (TEAS), postoperative ileus (POI), Pretreatment                                                                                                                                                                                                                                                                                                                                                                                                                                                                                                                                                                                                                                                                                                                                                                                                                                                                                                                                                                                                                                                                                                                                                                                                                                                                                                                     |
|                                 |                                                                                                                                                                                                                                                                                                                                                                                                                                                                                                                                                                                                                                                                                                                                                                                                                                                                                                                                                                                                                                                                                                                                                                                                                                                                                                                                                                                                                    |

1  
2  
3  
4  
5  
6  
7  
8  
9  
10  
11  
12  
13  
14  
15  
16  
17  
18  
19  
20  
21  
22  
23  
24  
25  
26  
27  
28  
29  
30  
31  
32  
33  
34  
35  
36  
37  
38  
39  
40  
41  
42  
43  
44  
45  
46  
47  
48  
49  
50  
51  
52  
53  
54  
55  
56  
57  
58  
59  
60

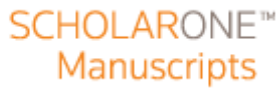



I, the Submitting Author has the right to grant and does grant on behalf of all authors of the Work (as defined in the below author licence), an exclusive licence and/or a non-exclusive licence for contributions from authors who are: i) UK Crown employees; ii) where BMJ has agreed a CC-BY licence shall apply, and/or iii) in accordance with the terms applicable for US Federal Government officers or employees acting as part of their official duties; on a worldwide, perpetual, irrevocable, royalty-free basis to BMJ Publishing Group Ltd ("BMJ") its licensees and where the relevant Journal is co-owned by BMJ to the co-owners of the Journal, to publish the Work in this journal and any other BMJ products and to exploit all rights, as set out in our [licence](#).

The Submitting Author accepts and understands that any supply made under these terms is made by BMJ to the Submitting Author unless you are acting as an employee on behalf of your employer or a postgraduate student of an affiliated institution which is paying any applicable article publishing charge ("APC") for Open Access articles. Where the Submitting Author wishes to make the Work available on an Open Access basis (and intends to pay the relevant APC), the terms of reuse of such Open Access shall be governed by a Creative Commons licence – details of these licences and which [Creative Commons](#) licence will apply to this Work are set out in our licence referred to above.

Other than as permitted in any relevant BMJ Author's Self Archiving Policies, I confirm this Work has not been accepted for publication elsewhere, is not being considered for publication elsewhere and does not duplicate material already published. I confirm all authors consent to publication of this Work and authorise the granting of this licence.

1  
2  
3  
4 1 **Pretreatment with transcutaneous electrical acupoint stimulation to prevent**  
5  
6 2 **postoperative ileus in patients undergoing laparoscopic colon surgery: study protocol for**  
7  
8 3 **a randomized controlled trial**  
9  
10 4

11 5 Wang, Jian MD<sup>1,#</sup>; Li, Dongli MD<sup>2,#</sup>; Tang, Wei MD<sup>1</sup>; Guo, Jun MD<sup>1</sup>; Chen, Wenting MD<sup>1</sup>;  
12 6 Yong, Yue MD<sup>1</sup>; Yu, Guijie MD<sup>1</sup>; Feng, Rui MD<sup>1</sup>; Yuan, Lan MD<sup>1</sup>; Fu, Guoqiang MD<sup>1</sup>; Song,  
13 7 Jiangang MD<sup>1,\*</sup>; Fan, Lihua MD<sup>2,\*</sup>  
14  
15  
16  
17  
18  
19

20 9 <sup>1</sup>Department of Anesthesiology, Shuguang Hospital Affiliated to Shanghai University of  
21 10 Traditional Chinese Medicine, Shanghai, China

22 11 <sup>2</sup>Department of Anesthesiology, Wenzhou Medical University, the sixth Affiliated Hospital,  
23 12 Lishui 323000, China  
24  
25  
26  
27  
28  
29

30 14 #These authors contributed equally to this work.  
31  
32  
33

34 16 \*Corresponding Author: Li-hua Fan. Department of Anesthesiology, Wenzhou Medical  
35 17 University, the sixth Affiliated Hospital, Lishui 323000, China; Email: fanlihua\_ls@126.com.  
36 18 Jian-gang Song, Department of Anesthesiology, Shuguang Hospital Affiliated to Shanghai  
37 19 University of Traditional Chinese Medicine, Shanghai 201203, China. email:  
38 20 songjg1993@126.com  
39  
40  
41  
42  
43  
44  
45  
46  
47  
48  
49  
50  
51  
52  
53  
54  
55  
56  
57  
58  
59  
60

1  
2  
3  
4 22 **Abstract**

5 23 **Introduction:** Postoperative ileus (POI), a common complication after surgery, severely affects  
6  
7  
8 24 postoperative recovery. It is unclear whether pretreatment with transcutaneous electrical  
9  
10 25 acupoint stimulation (TEAS) can improve recovery from POI. This trial will evaluate the effects  
11  
12 26 of pretreatment with TEAS on POI.

13  
14 27 **Methods and analysis:** This will be a prospective, randomized, controlled trial. ASA I–III  
15  
16 28 level patients, aged 18–75 years and scheduled for laparoscopic colon surgery, will be included  
17  
18 29 in the study. It is planned that 146 subjects will be randomized to the TEAS and sham TEAS  
19  
20 30 (STEAS) groups. The groups will undergo two sessions of TEAS/STEAS daily for three days  
21  
22 31 before surgery, with a final TEAS/STEAS treatment 30 minutes before anesthesia. The primary  
23  
24 32 endpoint of the study will be time to first defecation. Secondary endpoints will include time to  
25  
26 33 first flatus, time to tolerance of oral diet, GI-2 (composite outcome of time to first defecation  
27  
28 34 and time to tolerance of oral diet), time to independent walking , length of hospital stay,  
29  
30 35 postoperative pain VAS score on the first three days after surgery, analgesic requirements,  
31  
32 36 complications, and plasma concentrations of IFN- $\beta$ , IFN- $\gamma$ , IL-6 and IL-1 $\beta$ . Multiple linear  
33  
34 37 regression will be used to identify independent predictors of outcome measures.

35  
36 38 **Ethics and dissemination:** This study has been approved by the Chinese Registered Clinical  
37  
38 39 Trial Ethics Review Committee (NO.ChiECRCT-20170084). The results of the trial will be  
39  
40 40 published in an international peer-reviewed journal.

41 41 **Trial registration:** This study has been registered with the Chinese Clinical Trial Registry (NO.  
42  
43 42 ChiCTR-INR-17013184).

44 43 **Trial status:** The study was in the recruitment phase at the time of manuscript submission.

45 44 **Abbreviations:** POI = postoperative ileus, TCM = traditional Chinese medicine, EA = electro-  
46  
47 45 acupuncture, TEAS = transcutaneous electrical acupoint stimulation, BIS = bispectral index,  
48  
49 46 PACU = post anesthesia care unit, ERAS= enhanced recovery after surgery.

50  
51 47 **Key words:** transcutaneous electrical acupoint stimulation (TEAS); postoperative ileus (POI);  
52  
53 48 pretreatment.  
54  
55  
56  
57  
58  
59  
60

1  
2  
3  
4 49 Strengths and limitations of the study

5 50

6  
7 51 ➤ This study aims to evaluate whether pretreatment with transcutaneous electrical  
8 52 acupoint stimulation (TEAS) can prevent postoperative ileus (POI).

9 53 ➤ TEAS is a safe, noninvasive and easily accepted adjunctive intervention.

10  
11 54 ➤ This study will provide deeper insights into the mechanism by which TEAS  
12 55 pretreatment reduces the inflammatory response.

13  
14 56 ➤ This is a single-center study, which is a potential limitation.  
15  
16  
17  
18  
19  
20  
21  
22  
23  
24  
25  
26  
27  
28  
29  
30  
31  
32  
33  
34  
35  
36  
37  
38  
39  
40  
41  
42  
43  
44  
45  
46  
47  
48  
49  
50  
51  
52  
53  
54  
55  
56  
57  
58  
59  
60

For peer review only

## 57 **Introduction**

58 Postoperative ileus (POI) is a transient dysfunction of gastrointestinal propulsion that often  
59 occurs after abdominal surgery and may also occur following surgery at other sites<sup>1</sup>. The main  
60 symptoms of POI include abdominal pain and distention, nausea, vomiting, difficult  
61 defecation and intolerance to solid food. POI is usually temporary, but if prolonged, may lead  
62 to surgical incision dehiscence, intestinal anastomotic fistula, abdominal cavity infection,  
63 intestinal ischemia, aspiration pneumonia and other serious complications<sup>2-4</sup>. A retrospective  
64 cohort study involving nearly 500 hospitals in the United States showed that POI is a key reason  
65 for prolonged hospitalization and increased medical costs for patients undergoing abdominal  
66 surgery<sup>1</sup>. The United States spends more than \$1.46 billion treating POI every year<sup>5</sup>. At present,  
67 the most common methods used to treat POI include: rational perioperative use of narcotic  
68 drugs and opioids, eating as soon as possible after surgery, avoidance of nasogastric tubes after  
69 the operation, early ambulation, postoperative epidural analgesia, restriction of fluid intake, the  
70 use of minimally invasive surgery (such as laparoscopic), drug therapy and the use of chewing  
71 gum. Despite the numerous treatment strategies, POI remains a difficult clinical challenge that  
72 compromises the rapid recovery of postoperative patients. It is, therefore, necessary to find  
73 more effective, convenient and economical treatment methods<sup>6-10</sup>.

74 The main mechanism underlying POI may be activation of macrophages in the external  
75 muscular layer during the surgical procedure<sup>11</sup>. Intestinal manipulation during surgery can  
76 activate macrophages in the outer muscle layer of the small intestine, leading to release of  
77 inflammatory factors (IL-6, IL-1 $\beta$ ) and the chemokine MIP-1 $\alpha$ , together with increased  
78 expression of the adhesion molecule ICAM-1 on endothelial cells and induction of neutrophils  
79 and monocytes in the circulation into the small intestine muscle layer. These cells, and activated  
80 macrophages, can release a large amount of inducible nitric oxide synthase (iNOS) and  
81 prostaglandin, which inhibit the movement and contraction of the gastrointestinal tract<sup>12,13</sup>.  
82 Transport of these inflammatory mediators in the blood stream causes activation of  
83 macrophages in the distal gastrointestinal tract, leading to total gastrointestinal paralysis<sup>14</sup>. It



1  
2  
3  
4 84 has been confirmed by a large number of animal experiments that reducing the inflammatory  
5  
6 85 response is an effective way to treat POI<sup>15-17</sup>.

7  
8 86 There is a long history in traditional Chinese medicine (TCM) of using acupuncture to treat  
9  
10 87 functional gastrointestinal diseases and, in recent years, there has been significant global  
11  
12 88 interest in the beneficial effects of acupuncture on POI. The positive effect of  
13  
14 89 electroacupuncture (EA) on POI has been clearly demonstrated. Ng *et al.* used EA to treat  
15  
16 90 postoperative intestinal paralysis in patients undergoing laparoscopic colon surgery<sup>18</sup>.  
17  
18 91 Defecation time and length of hospital stay were significantly shortened in patients who  
19  
20 92 received EA compared with those who did not receive the treatment. In patients undergoing  
21  
22 93 hepatic resection, You *et al.* found a significant reduction in the incidence of POI in patients  
23  
24 94 treated with a combination of acupuncture and Chinese herbal medicine. The length of  
25  
26 95 hospitalization was also significantly shortened in the treated group ( $14.0 \pm 4.9$  d vs  $16.5 \pm 6.8$   
27  
28 96 d,  $P = 0.014$ )<sup>19</sup>.

29  
30 97 In previous studies, we proved that pretreatment with acupuncture could reduce excessive  
31  
32 98 activation of the innate immune system and inhibit the inflammatory response. This effect may  
33  
34 99 be achieved by activation of the vagal nervous system<sup>20,21</sup>. Other studies have shown that  
35  
36 100 transcutaneous electrical acupoint stimulation (TEAS) and EA have similar effects in the  
37  
38 101 treatment of pain and alleviating the inflammatory response<sup>22,23</sup>.

39  
40 102 Traditional Chinese medicine holds that the best treatment for disease is prevention . Based on  
41  
42 103 all of the above studies, we hypothesize that the use of TEAS as a preoperative treatment may  
43  
44 104 reduce the incidence of POI. There have, so far, not been any studies that address this question.  
45  
46 105 We have, therefore, designed a randomized, controlled trial to investigate whether pretreatment  
47  
48 106 with TEAS can reduce the incidence of POI in patients undergoing laparoscopic colon resection.  
49  
50 107 The study is also designed to verify that the anti-inflammatory effect is associated with the  
51  
52 108 immunomodulatory function of TEAS.

53  
54  
55 109

## 56 110 **Methods and analysis**

### 57 58 111 ***Study objective***

1  
2  
3  
4 112 The primary objective is to assess the effect of TEAS on clinical recovery of bowel function  
5  
6 113 after laparoscopic colon surgery. The secondary objective is to verify that suppression of  
7  
8 114 overactivation of the innate immune system and reduction of the inflammatory response are the  
9  
10 115 mechanisms underlying the ability of pretreatment of percutaneous acupuncture to prevent POI.

### 116 ***Study location***

117 A prospective, single-center, single-blinded, randomized, controlled trial will be conducted at  
118 Shuguang Hospital, which is affiliated to the Shanghai University of Traditional Chinese  
119 Medicine, China.

### 120 ***Study population***

121 Participants will be recruited according to the inclusion and exclusion criteria.

### 122 **Inclusion criteria**

- 123 1. Male and female patients aged 18–75 years
- 124 2. Patients undergoing elective laparoscopic colonic surgery and upper rectal resection (such  
125 as left colectomy, right colectomy, and anterior resection of the upper part of the rectum  
126 and lower part of the sigmoid)
- 127 3. Body mass index (BMI) 18–31 kg/m<sup>2</sup>
- 128 4. ASA classification I–III
- 129 5. Patients provide signed informed consent

### 130 **Exclusion criteria**

- 131 1. Middle and lower rectal resection, total/proctocolectomy or the need for complex  
132 endoscopic surgery
- 133 2. Need for abdominal wall fistula, gastrointestinal fistula, fistula surgery or stoma creation
- 134 3. History of abdominal/pelvic operations or complications
- 135 4. Patients receiving epidural anesthesia or epidural analgesia
- 136 5. Patients with skin infections, surgical incision or scar at the point of application of  
137 acupuncture
- 138 6. Patients with limbs, spinal surgery or nerve injury

- 1  
2  
3  
4 139 7. Patients who participated in other clinical trials, or received other acupuncture therapy, in  
5  
6 140 the previous four weeks  
7  
8 141 8. Patients with cardiac pacemakers  
9  
10 142 9. Patients with preoperative combined pain, patients using centrally active analgesic drugs,  
11  
12 143 opioid addiction or dependency, patients with a history of alcoholism  
13  
14 144 10. Patients with preoperative combination of severe central nervous system disease and  
15  
16 145 severe mental illness

17  
18 146 **Endpoints**

19  
20 147 **Primary endpoint**

21  
22 148 First defecation time (h) i.e., time to first anal defecation after laparoscopic surgery.

23  
24 149 **Secondary endpoints**

25  
26 150 Time to first flatus (h), time to tolerance of solid oral diet (h), GI-2 (composite outcome of time  
27  
28 151 to first defecation and time to tolerance of oral diet), time to walk independently (h), length of  
29  
30 152 hospital stay, defined as number of days from operation to discharge (d). Criteria for hospital  
31  
32 153 discharge include stability of vital signs with no fever, achievement of flatus or defecation,  
33  
34 154 ability to tolerate solid food without vomiting, control of postoperative pain, absence of other  
35  
36 155 postoperative complications and ability to function at home independently or with home care  
37  
38 156 provided. Pain will be assessed using the visual analogue scale (VAS) on postoperative days 1,  
39  
40 157 2 and 3 (scale of 0 to 10, where 0 represents complete absence of pain and 10 represent the  
41  
42 158 worst pain intensity). Postoperative requirements for analgesia will also be assessed.  
43  
44 159 Inflammatory mediators (IFN- $\beta$ , IFN- $\gamma$ , IL-6 and IL-1 $\beta$ ) in blood will be measured before  
45  
46 160 TEAS/STEAS intervention and on days 1, 3 and 5 after the operation. Postoperative  
47  
48 161 complications will be recorded using the Clavien - Dindo classification for complication  
49  
50 162 assessment<sup>24</sup>. The follow-up period will be at least 6 months.

51  
52 163 **Randomization and blinding**

53  
54 164 Patients will be randomized to receive either TEAS or STEAS by stratified randomization  
55  
56 165 according to sex, in a 1:1 ratio (Figure 1). Using a computer-generated random sequence, a  
57  
58 166 sealed envelope will be opened to determine to which group the patient has been assigned. The

1  
2  
3  
4 167 acupuncturist will be aware of the treatment group, but the nurse anesthetist, as outcome  
5  
6 168 investigator, will be blinded to the treatment allocation.

7  
8 169 ***Current sample size justification***

9  
10 170 According to Wang Jian and Song Jiangan's preliminary study of transcutaneous electrical  
11  
12 171 acupoint stimulation pretreatment for prevention of postoperative ileus in patients undergoing  
13  
14 172 laparoscopic colon surgery in Shuguang Hospital, the mean time to first defecation following  
15  
16 173 laparoscopic colon surgery was  $62 \pm 19$  h ( $M \pm SD$ ). Working on the assumption that a clinically  
17  
18 174 meaningful difference in mean time to first defecation between the TEAS and STEAS groups  
19  
20 175 is 1 day or 24 h, 66 patients would be needed in each group to reach a power of 80% and a 5%  
21  
22 176 Type I error rate. If the drop-out rate is 10%, a total sample size of 146 patients for the two  
23  
24 177 groups is needed for this study.

25  
26 178 ***Statistical analysis***

27  
28 179 Data for continuous variables (i.e., first defecation time, first passage of flatus, time to tolerance  
29  
30 180 of oral diet, time to walking independently, length of hospital stay) will be reported using the  
31  
32 181 mean and standard deviation ( $M \pm SD$ ) for normally distributed data or median (range) for  
33  
34 182 skewed data. Data for categorical variables will be expressed as a number (percentage).  
35  
36 183 Intergroup differences will be assessed using the Student's t-test or Mann-Whitney U test.  
37  
38 184 Outcomes such as time to first flatus, time to tolerance of oral diet, GI-2 and time to walking  
39  
40 185 independently will be included in multiple linear regression to identify independent predictors  
41  
42 186 that affect length of hospital stay. The significance level will be set at 5%. All data will be  
43  
44 187 analyzed using SPSS 17.0 software or other appropriate statistical software packages.

45  
46 188 ***Pretreatment***

47  
48 189 Patients randomized to the TEAS and STEAS groups will undergo two treatment sessions daily  
49  
50 190 for three consecutive days before surgery. The patients will then be treated for a final time 30  
51  
52 191 minutes before anesthesia.

53  
54 192 For patients in the TEAS group, the Zusanli (ST-36), Shangjuxu (ST-37), Hegu (LI-4) and  
55  
56 193 Neiguan (P-6) acupoints will be identified before electrical stimulation with surface electrodes  
57  
58 194 (Figure 2). Selection of these acupoints is based on a consensus between the acupuncturists

1  
2  
3  
4 195 carrying out the study. The acupuncturist will stimulate these acupoints using a Han's acupoint  
5  
6 196 nerve stimulator (HANS200A, Nanjing Jisheng Medical Technology Co., Ltd., Nanjing, China),  
7  
8 197 at a frequency of 100 Hz. The intensity will be adjusted for each individual to maintain a slight  
9  
10 198 twitching of the regional muscle and achieve De-Qi sensations, such as soreness, numbness,  
11  
12 199 distention and heaviness. The STEAS group will receive a strong, but comfortable current for  
13  
14 200 30 s, and the current will then gradually vanish over the next 15 s. The participants will be told  
15  
16 201 that they are receiving TEAS, but that sensation thresholds differ and that there may be no  
17  
18 202 precise perception of current stimulation. Each session of acupoints treatment will last for 30  
19  
20 203 min. During the application of TEAS, patients will be required not to change the current settings  
21  
22 204 themselves. A prompt beep at the end of TEAS will indicate the end of treatment.

23  
24 205 All surgery will be carried out under general anesthesia, using standardized anesthetic  
25  
26 206 procedures. Patients will be fasted for 12 h before surgery. Right upper extremity venous access  
27  
28 207 will be established before the patients entering the operating theater. Ringer's lactate solution  
29  
30 208 (8 mL/kg) will be administered by intravenous infusion for compensatory expansion before  
31  
32 209 induction of anesthesia. Patients will then receive midazolam (0.04 mg/kg), fentanyl (3 µg/kg),  
33  
34 210 vecuronium bromide (0.1 mg/kg) and propofol (1.5–2.0 mg/kg) intravenously for induction of  
35  
36 211 anesthesia. Anesthesia will be maintained using a CP-600 anesthesia delivery system (Slgo  
37  
38 212 Medical Technology Co., Ltd., Beijing, China). The dose of propofol will be adjusted to  
39  
40 213 maintain the bispectral index (BIS) in the range 40–60. After surgery, all patients will remain  
41  
42 214 in the post anesthesia care unit and then return to the ward for recovery until discharge.

43  
44 215 The perioperative management of all patients will be standardized. Early ambulation will be  
45  
46 216 encouraged and oral feeding will be resumed as early as possible. All patients will be followed-  
47  
48 217 up for at least 6 months after discharge from the hospital.

#### 49 218 *Adverse events*

50  
51 219 All adverse reactions will be closely monitored through spontaneous reports by patients or  
52  
53 220 direct observation by clinicians, or by asking the patients about adverse events using open  
54  
55 221 questions. All adverse reactions will be recorded and appropriate treatment will be provided if  
56  
57 222 necessary. Serious adverse events will be reported to the ethics committee.  
58  
59  
60

1  
2  
3  
4 223 ***Data collection and management***

5 224 Demographic variables and clinical data will be collected from all patients. During the study,  
6  
7 225 blood pressure, heart rate and oxygen saturation will also be monitored. Any adverse events  
8  
9 226 will be recorded. Data will be collected throughout the study and will be securely managed  
10  
11 227 under conditions of confidentiality. Data collection will be performed by a nurse anesthetist.  
12  
13 228 The participants will be referred to by their participant number rather than by their name  
14  
15 229 throughout the study, unless otherwise specified. All relevant documents and files will be  
16  
17 230 archived for 5 years. The data will be accessible only by investigators who sign the confidential  
18  
19 231 disclosure agreement and by institutional or governmental auditors during the study. Data  
20  
21 232 without patient identifiers will be publicly accessible after the study. Data collection and  
22  
23 233 management will be monitored by the Institutional Ethics Committee for Clinical Research of  
24  
25 234 Shuguang Hospital.

26  
27  
28 235 ***Patient and public involvement***

29  
30 236 This study is currently in the recruitment phase. The participants will be able to access the study  
31  
32 237 results through social media.

33  
34 238 **Discussion**

35  
36 239 POI continues to represent an important cause of morbidity following colon surgery. The  
37  
38 240 prevention of postoperative bowel paralysis is thus of great importance in reducing  
39  
40 241 perioperative complications and reducing hospitalization costs. Although it has been shown  
41  
42 242 that EA can shorten the duration of POI<sup>18</sup>, the effectiveness of TEAS, which is a similar  
43  
44 243 technique, in preventing POI has not been investigated. It is, therefore, important to assess the  
45  
46 244 effectiveness of TEAS in preventing POI through a clinical study.

47  
48 245 This study has several strengths. Firstly, the intervention strategy of the protocol will be  
49  
50 246 pretreatment with TEAS. Previous studies have shown that pretreatment has a prophylactic  
51  
52 247 effect. For example, pretreatment with TEAS has been shown to improve pain treatment<sup>25,26</sup>  
53  
54 248 and to improve resuscitation after anesthesia, with reduction of postoperative nausea and  
55  
56 249 vomiting<sup>27</sup>. It is, however, unclear whether preoperative TEAS can prevent POI. Studies  
57  
58 250 suggest that early preoperative intervention may be more beneficial in regulating physiological  
59  
60

1  
2  
3  
4 251 functions and preventing gastrointestinal paralysis<sup>28</sup>. In an extension to these findings, the  
5  
6 252 present study will help to determine whether TEAS pretreatment could improve  
7  
8 253 postoperative bowel paralysis.

9  
10 254 Secondly, the effectiveness of TEAS will be evaluated by assessing clinical function and by  
11  
12 255 serological examination. In this randomized controlled trial of patients undergoing laparoscopic  
13  
14 256 colorectal surgery, our aim is to assess the effects of preoperative TEAS on POI using relevant  
15  
16 257 clinical parameters associated with bowel function. These include time to first defecation, time  
17  
18 258 to first flatus, time to tolerance of oral diet and GI-2. Importantly, we will also measure serum  
19  
20 259 concentrations of inflammatory mediators associated with POI, such as IFN- $\beta$ , IFN- $\gamma$ , IL-6 and  
21  
22 260 IL-1 $\beta$ . Our findings may, thus, provide deeper insights into the mechanisms by which TEAS  
23  
24 261 improves POI.

25  
26 262 There are also limitations to this protocol. Various clinical indicators have been used in studies  
27  
28 263 for the diagnosis of POI, but there is no consensus on which clinical parameter is the best for  
29  
30 264 assessment of gastrointestinal (GI) transit<sup>9,29,30</sup>. Two indicators that are widely used to assess  
31  
32 265 bowel movement will be used in this study. Time to first defecation will be the primary outcome  
33  
34 266 and time to first flatus will be one of the secondary outcomes. There is a possibility that we  
35  
36 267 may observe conflicting results (i.e., significant improvement in time to flatus, but not  
37  
38 268 defecation). Because flatus can vary considerably between patients, clinical trials support the  
39  
40 269 time to tolerance of oral diet and GI-2 (defined as the later of the following two events: time to  
41  
42 270 first tolerance of solid food and time to first bowel movement) as supplementary  
43  
44 271 secondary outcomes to measure the recovery time of GI function and these will be used in this  
45  
46 272 study<sup>31,32</sup>. Other limitations of these indicators are that they require objective measurement of  
47  
48 273 motility and are time consuming to measure<sup>33,34</sup>. Recently, this situation has been improved by  
49  
50 274 the use of in vivo monitoring techniques to assess the function of gastrointestinal movements.  
51  
52 275 Innovative devices, such as Sitz markers, have been used to evaluate postoperative recovery of  
53  
54 276 small bowel movement by counting the number of Sitz markers that did not pass through the  
55  
56 277 ileocecal valve, but remained in the small intestine using radiography<sup>35</sup>. The SmartPill is a  
57  
58 278 swallowable device that records parameters within the GI tract. Indicators, such as pH,  
59  
60

1  
2  
3  
4 279 temperature and intracavitary pressure, can be collected to analyze gastrointestinal transit times  
5  
6 280 in vivo<sup>36</sup>. These devices acquire objective parameters to evaluate bowel movement and could  
7  
8 281 save time. Research into the satisfaction of both doctors and patients with these device needs  
9  
10 282 to be carried out. Furthermore, this study is a single-center trial and, because the therapeutic  
11  
12 283 effect of TEAS may be affected by ethnicity and region, it will be necessary to conduct multi-  
13  
14 284 center and large sample studies in the future.

15  
16 285 Notwithstanding its limitations, this study can clearly indicate the overall effects of TEAS on  
17  
18 286 postoperative recovery. We hypothesize that pretreatment with TEAS could improve recovery  
19  
20 287 of gastrointestinal function in patients undergoing laparoscopic surgery. If this study provides  
21  
22 288 positive results, it will be possible to recommend this pretreatment strategy for patients  
23  
24 289 undergoing abdominal surgery. Relevant cost-effectiveness studies are also worthy of  
25  
26 290 consideration.

#### 27 28 291 ***Acknowledgements***

29  
30 292 We thank Dr. Stanley Tao from Shanghai Ruihui Biotech for his valuable assistance in the  
31  
32 293 statistical design of this study.

#### 33 34 294 ***Funding***

35  
36 295 The present study is supported by the project of the National Natural Science Foundation of  
37  
38 296 China (No. 81703898) and the commercial sponsorship of SINCH Pharmaceuticals Tech. Co.,  
39  
40 297 Ltd.

#### 41 42 298 ***Availability of data and materials***

43  
44 299 The dataset to be generated during the study will be available from the corresponding author  
45  
46 300 on reasonable request via email.

#### 47 48 301 ***Author contributions***

49  
50 302 Jian Wang conceived the study. Dong-li Li, Wei Tang, Jun Guo and Guo-qiang Fu participated  
51  
52 303 in its design and coordination. Wen-ting Chen, Yue Yong, Jia-qun He and Jun Guo collected  
53  
54 304 references and developed the protocol. Gui-jie Yu and Lan Yuan will perform statistical  
55  
56 305 analyses. Rui Feng will follow-up with patients and record data. Jian Wang, Li-hua Fan and  
57  
58 306 Jian-gang Song drafted the manuscript. All authors have read and approved the final manuscript.



1  
2  
3  
4  
5  
6  
7  
8  
9  
10  
11  
12  
13  
14  
15  
16  
17  
18  
19  
20  
21  
22  
23  
24  
25  
26  
27  
28  
29  
30  
31  
32  
33  
34  
35  
36  
37  
38  
39  
40  
41  
42  
43  
44  
45  
46  
47  
48  
49  
50  
51  
52  
53  
54  
55  
56  
57  
58  
59  
60

307 ***Competing interests***

308 None declared.

For peer review only

310 **References**

- 311 1. Iyer S, Saunders WB, Stemkowski S. Economic burden of postoperative  
312 ileus associated with colectomy in the United States. *J Manag*  
313 *Care Pharm* 2009;15(6):485–94. doi: 10.18553/jmcp.2009.15.6.485
- 314 2. Boelens PG, Heesakkers FF, Luyer MD, et al. Reduction of  
315 postoperative ileus by early enteral nutrition in patients  
316 undergoing major rectal surgery: prospective, randomized,  
317 controlled trial. *Ann Surg* 2014;259(4):649–55. doi:  
318 10.1097/SLA.0000000000000288
- 319 3. Melis M, Fichera A, Ferguson MK. Bowel necrosis associated with  
320 early jejunal tube feeding: A complication of postoperative  
321 enteral nutrition. *Arch Surg* 2006;141(7):701–4. doi:  
322 10.1001/archsurg.141.7.701
- 323 4. Moghadamyeghaneh Z, Hwang GS, Hanna MH, et al. Risk factors for  
324 prolonged ileus following colon surgery. *Surg Endosc*  
325 2016;30(2):603–09. doi: 10.1007/s00464-015-4247-1
- 326 5. Goldstein JL, Matuszewski KA, Delaney CP, et al. Inpatient economic  
327 burden of postoperative ileus associated with abdominal surgery  
328 in the United States. *P and T* 2007;32(2):82–90.
- 329 6. Bragg D, El-Sharkawy AM, Psaltis E, et al. Postoperative ileus:  
330 Recent developments in pathophysiology and management. *Clin Nutr*  
331 2015;34(3):367–76. doi: 10.1016/j.clnu.2015.01.016
- 332 7. Wolthuis AM, Bislenghi G, Fieuids S, et al. Incidence of prolonged  
333 postoperative ileus after colorectal surgery: a systematic  
334 review and meta-analysis. *Colorectal Dis* 2016;18(1):01–9. doi:  
335 10.1111/codi.13210
- 336 8. Nguyen DL, Maithel S, Nguyen ET, et al. Does Alvimopan enhance  
337 return of bowel function in laparoscopic gastrointestinal  
338 surgery? A meta-analysis. *Annals of Gastroenterology*  
339 2015;28(4):475–80.
- 340 9. van Bree SH, Nemethova A, Cailotto C, et al. New therapeutic  
341 strategies for postoperative ileus. *Nat Rev Gastroenterol*  
342 *Hepatol* 2012;9(11):675–83. doi: 10.1038/nrgastro.2012.134
- 343 10. Hilton WM, Lotan Y, Parekh DJ, et al. Alvimopan for prevention of  
344 postoperative paralytic ileus in radical cystectomy patients: a  
345 cost-effectiveness analysis. *BJU Int* 2013;111(7):1054–60. doi:  
346 10.1111/j.1464-410X.2012.11499.x
- 347 11. Wehner S, Behrendt FF, Lyutenski BN, et al. Inhibition of  
348 macrophage function prevents intestinal inflammation and  
349 postoperative ileus in rodents. *Gut* 2007;56(2):176–85. doi:  
350 10.1136/gut.2005.089615

- 1  
2  
3 351 12. Wehner S, Straesser S, Vilz TO, et al. Inhibition of p38 mitogen-  
4 352 activated protein kinase pathway as prophylaxis of postoperative  
5 353 ileus in mice. *Gastroenterology* 2009;136(2):619-29. doi:  
6 354 10.1053/j.gastro.2008.10.017  
7  
8 355 13. Schwarz NT, Kalff JC, Turler A, et al. Prostanoid production via  
9 356 COX-2 as a causative mechanism of rodent postoperative ileus.  
10 357 *Gastroenterology* 2001;121(6):1354-71. doi:  
11 358 10.1053/gast.2001.29605  
12  
13 359 14. Engel DR, Koscielny A, Wehner S, et al. T helper type 1 memory  
14 360 cells disseminate postoperative ileus over the entire intestinal  
15 361 tract. *Nat Med* 2010;16(12):1407-13. doi: 10.1038/nm.2255  
16  
17 362 15. Adding LC, Bannenberg GL, Gustafsson LE. Basic experimental studies  
18 363 and clinical aspects of gadolinium salts and chelates. *Cardiovasc*  
19 364 *Drug Rev* 2001;19(1):41-56. doi: 10.1111/j.1527-  
20 365 3466.2001.tb00182.x  
21  
22 366 16. Koscielny A, Kalff JC. T-helper cell type 1 memory cells and  
23 367 postoperative ileus in the entire gut. *Curr Opin Gastroenterol*  
24 368 2011;27(6):509-14. doi: 10.1097/MOG.0b013e32834bb7d7  
25  
26 369 17. Mikkelsen HB, Thuneberg L. Op/op mice defective in production of  
27 370 functional colony-stimulating factor-1 lack macrophages in  
28 371 muscularis externa of the small intestine. *Cell Tissue Res*  
29 372 1999;295(3):485-93. doi: 10.1007/s004410051254  
30  
31 373 18. Ng SS, Leung WW, Mak TW, et al. Electroacupuncture reduces duration  
32 374 of postoperative ileus after laparoscopic surgery for colorectal  
33 375 cancer. *Gastroenterology* 2013;144(2):307-13 e1. doi:  
34 376 10.1053/j.gastro.2012.10.050  
35  
36 377 19. You XM, Mo XS, Ma L, et al. Randomized Clinical Trial Comparing  
37 378 Efficacy of Simo Decoction and Acupuncture or Chewing Gum Alone  
38 379 on Postoperative Ileus in Patients With Hepatocellular Carcinoma  
39 380 After Hepatectomy. *Medicine (Baltimore)* 2015;94(45):e1968. doi:  
40 381 10.1097/MD.0000000000001968  
41  
42 382 20. Song JG, Li HH, Cao YF, et al. Electroacupuncture improves survival  
43 383 in rats with lethal endotoxemia via the autonomic nervous system.  
44 384 *Anesthesiology* 2012;116(2):406-14. doi:  
45 385 10.1097/ALN.0b013e3182426ebd  
46  
47 386 21. Zhang J, Yong Y, Li X, et al. Vagal modulation of high mobility  
48 387 group box-1 protein mediates electroacupuncture-induced  
49 388 cardioprotection in ischemia-reperfusion injury. *Sci Rep*  
50 389 2015;5:15503. doi: 10.1038/srep15503  
51  
52 390 22. Balogun JA, Biasci S, Han L. The effects of acupuncture,  
53 391 electroneedling and transcutaneous electrical stimulation

- 1  
2  
3 392 therapies on peripheral haemodynamic functioning. *Disabil Rehabil* 1998;20(2):41-8. doi: 10.3109/09638289809166052
- 4 393
- 5 394 23. Jiang Y, Wang H, Liu Z, et al. Manipulation of and sustained effects
- 6 395 on the human brain induced by different modalities of acupuncture:
- 7 396 an fMRI study. *PLoS One* 2013;8(6):e66815. doi:
- 8 397 10.1371/journal.pone.0066815
- 9 398 24. Dindo D, Demartines N, Clavien PA. Classification of surgical
- 10 399 complications: a new proposal with evaluation in a cohort of 6336
- 11 400 patients and results of a survey. *Ann Surg* 2004;240(2):205-13.
- 12 401 doi: 10.1097/01.sla.0000133083.54934.ae
- 13 402 25. Huang L, Pan Y, Chen S, et al. Prevention of propofol injection-
- 14 403 related pain using pretreatment transcutaneous electrical
- 15 404 acupoint stimulation. *Turk J Med Sci* 2017;47(4):1267-76. doi:
- 16 405 10.3906/sag-1611-35
- 17 406 26. Zhang Q, Gao Z, Wang H, et al. The effect of pre-treatment with
- 18 407 transcutaneous electrical acupoint stimulation on the quality of
- 19 408 recovery after ambulatory breast surgery: a prospective,
- 20 409 randomised controlled trial. *Anaesthesia* 2014;69(8):832-9. doi:
- 21 410 10.1111/anae.12639
- 22 411 27. Zheng LH, Sun H, Wang GN, et al. Effect of transcutaneous electrical
- 23 412 acupoint stimulation on nausea and vomiting induced by patient
- 24 413 controlled intravenous analgesia with tramadol. *Chin J Integr*
- 25 414 *Med* 2008;14(1):61-4. doi: 10.1007/s11655-007-9006
- 26 415 28. Stakenborg N, Labeeuw E, Gomez-Pinilla PJ, et al. Preoperative
- 27 416 administration of the 5-HT4 receptor agonist prucalopride
- 28 417 reduces intestinal inflammation and shortens postoperative ileus
- 29 418 via cholinergic enteric neurons. *Gut* 2019;68(8):1406-16. doi:
- 30 419 10.1136/gutjnl-2018-317263
- 31 420 29. Vather R, Trivedi S, Bissett I. Defining postoperative ileus:
- 32 421 results of a systematic review and global survey. *J Gastrointest*
- 33 422 *Surg* 2013;17(5):962-72. doi: 10.1007/s11605-013-2148-y
- 34 423 30. Wu Z, Boersema GS, Dereci A, et al. Clinical endpoint, early
- 35 424 detection, and differential diagnosis of postoperative ileus: a
- 36 425 systematic review of the literature. *Eur Surg Res* 2015;54(3-
- 37 426 4):127-38. doi: 10.1159/000369529
- 38 427 31. Deng G, Wong WD, Guillem J, et al. A phase II, randomized,
- 39 428 controlled trial of acupuncture for reduction of Postcolectomy
- 40 429 Ileus. *Annals of surgical oncology* 2013;20(4):1164 - 69. doi:
- 41 430 10.1245/s10434-012-2759-7
- 42 431 32. van Bree SH, Bemelman WA, Hollmann MW, et al. Identification of
- 43 432 clinical outcome measures for recovery of gastrointestinal

- 1  
2  
3 433 motility in postoperative ileus. *Ann Surg* 2014;259(4):708-14.  
4 434 doi: 10.1097/SLA.0b013e318293ee55  
5  
6 435 33. Maffezzini M, Campodonico F, Canepa G, et al. Current perioperative  
7 436 management of radical cystectomy with intestinal urinary  
8 437 reconstruction for muscle-invasive bladder cancer and reduction  
9 438 of the incidence of postoperative ileus. *Surg Oncol*  
10 439 2008;17(1):41-8. doi: 10.1016/j.suronc.2007.09.003  
11  
12  
13 440 34. Bungard TJ, Kale-Pradhan PB. Prokinetic agents for the treatment  
14 441 of postoperative ileus in adults: a review of the literature.  
15 442 *Pharmacotherapy* 1999;19(4):416-23. doi:  
16 443 10.1592/phco.19.6.416.31040  
17  
18 444 35. Chae HD, Kwak MA, Kim IH. Effect of Acupuncture on Reducing Duration  
19 445 of Postoperative Ileus After Gastrectomy in Patients with Gastric  
20 446 Cancer: a Pilot Study Using Sitz Marker. *Journal of alternative*  
21 447 *and complementary medicine (new york, NY)* 2016;22(6):465 - 72.  
22 448 doi: 10.1089/acm.2015.0161  
23  
24  
25 449 36. Vilz TO, Pantelis D, Lingohr P, et al. SmartPill® as an objective  
26 450 parameter for determination of severity and duration of  
27 451 postoperative ileus: study protocol of a prospective, two-arm,  
28 452 open-label trial (the PIDuSA study). *Bmj Open* 2016;6(7):e011014.  
29  
30  
31 453  
32  
33 454

### 455 **Figure Legend**

456 Figure 1. Flow chart of the study protocol

457 Figure 2. Acupoints selected in this trial (a) Hegu (IL-4) and Neiguan (P-6); (b) Zusanli (ST-  
458 36) and Shangjuxu (ST-37); (c) Han's acupoint nerve stimulator

459  
460  
461  
462

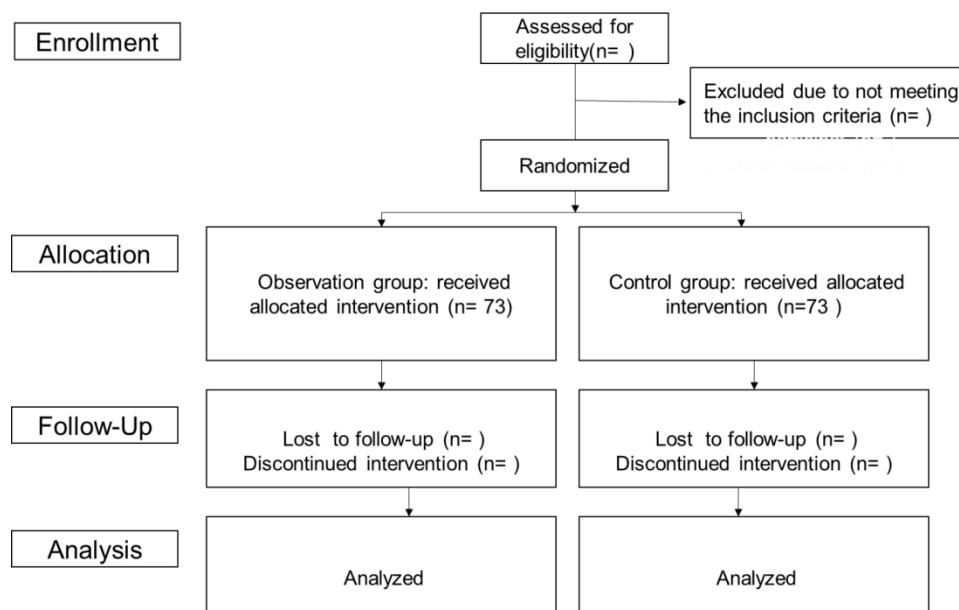

Figure 1. Flow chart of the study

177x109mm (300 x 300 DPI)



Figure 2. Acupoints selected in this trial. (a) shows Hegu (LI-4), Neiguan (P-6). (b) shows Zusanli (ST-36), Shangjuxu (ST-37). (c) Han's acupoint nerve stimulator.

103x87mm (300 x 300 DPI)

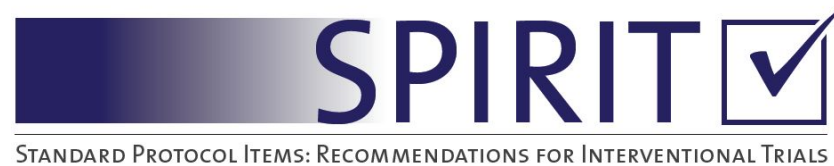

SPIRIT 2013 Checklist for the ReTrain pilot RCT: Recommended items to address in a clinical trial protocol and related documents\*

| Section/item                      | Item No | Description                                                                                                                                                                                                                                                                              | Addressed on page number |
|-----------------------------------|---------|------------------------------------------------------------------------------------------------------------------------------------------------------------------------------------------------------------------------------------------------------------------------------------------|--------------------------|
| <b>Administrative information</b> |         |                                                                                                                                                                                                                                                                                          |                          |
| Title                             | 1       | Descriptive title identifying the study design, population, interventions, and, if applicable, trial acronym                                                                                                                                                                             | _____ 1 _____            |
| Trial registration                | 2a      | Trial identifier and registry name. If not yet registered, name of intended registry                                                                                                                                                                                                     | _____ 2 _____            |
|                                   | 2b      | All items from the World Health Organization Trial Registration Data Set                                                                                                                                                                                                                 | _____ 2 _____            |
| Protocol version                  | 3       | Date and version identifier                                                                                                                                                                                                                                                              | _____ 2 _____            |
| Funding                           | 4       | Sources and types of financial, material, and other support                                                                                                                                                                                                                              | _____ 11 _____           |
| Roles and responsibilities        | 5a      | Names, affiliations, and roles of protocol contributors                                                                                                                                                                                                                                  | _____ 1&11 _____         |
|                                   | 5b      | Name and contact information for the trial sponsor                                                                                                                                                                                                                                       | _____ 11 _____           |
|                                   | 5c      | Role of study sponsor and funders, if any, in study design; collection, management, analysis, and interpretation of data; writing of the report; and the decision to submit the report for publication, including whether they will have ultimate authority over any of these activities | _____ 11 _____           |
|                                   | 5d      | Composition, roles, and responsibilities of the coordinating centre, steering committee, endpoint adjudication committee, data management team, and other individuals or groups overseeing the trial, if applicable (see Item 21a for data monitoring committee)                         | _____ 9 _____            |



|    |                                                           |     |                                                                                                               |                 |
|----|-----------------------------------------------------------|-----|---------------------------------------------------------------------------------------------------------------|-----------------|
| 1  | <b>Introduction</b>                                       |     |                                                                                                               |                 |
| 2  |                                                           |     |                                                                                                               |                 |
| 3  | Background and                                            | 6a  | Description of research question and justification for undertaking the trial, including summary of relevant   | _____ 4&5 _____ |
| 4  | rationale                                                 |     | studies (published and unpublished) examining benefits and harms for each intervention                        |                 |
| 5  |                                                           |     |                                                                                                               |                 |
| 6  |                                                           | 6b  | Explanation for choice of comparators                                                                         | _____           |
| 7  |                                                           |     |                                                                                                               |                 |
| 8  | Objectives                                                | 7   | Specific objectives or hypotheses                                                                             | _____ 5 _____   |
| 9  |                                                           |     |                                                                                                               |                 |
| 10 | Trial design                                              | 8   | Description of trial design including type of trial (eg, parallel group, crossover, factorial, single group), | _____ 5 _____   |
| 11 |                                                           |     | allocation ratio, and framework (eg, superiority, equivalence, noninferiority, exploratory)                   |                 |
| 12 |                                                           |     |                                                                                                               |                 |
| 13 |                                                           |     |                                                                                                               |                 |
| 14 | <b>Methods: Participants, interventions, and outcomes</b> |     |                                                                                                               |                 |
| 15 |                                                           |     |                                                                                                               |                 |
| 16 | Study setting                                             | 9   | Description of study settings (eg, community clinic, academic hospital) and list of countries where data will | _____ 6 _____   |
| 17 |                                                           |     | be collected. Reference to where list of study sites can be obtained                                          |                 |
| 18 |                                                           |     |                                                                                                               |                 |
| 19 | Eligibility criteria                                      | 10  | Inclusion and exclusion criteria for participants. If applicable, eligibility criteria for study centres and  | _____ 6 _____   |
| 20 |                                                           |     | individuals who will perform the interventions (eg, surgeons, psychotherapists)                               |                 |
| 21 |                                                           |     |                                                                                                               |                 |
| 22 | Interventions                                             | 11a | Interventions for each group with sufficient detail to allow replication, including how and when they will be | _____ 8&9 _____ |
| 23 |                                                           |     | administered                                                                                                  |                 |
| 24 |                                                           |     |                                                                                                               |                 |
| 25 |                                                           | 11b | Criteria for discontinuing or modifying allocated interventions for a given trial participant (eg, drug dose  | _____           |
| 26 |                                                           |     | change in response to harms, participant request, or improving/worsening disease)                             |                 |
| 27 |                                                           |     |                                                                                                               |                 |
| 28 |                                                           | 11c | Strategies to improve adherence to intervention protocols, and any procedures for monitoring adherence        | _____           |
| 29 |                                                           |     | (eg, drug tablet return, laboratory tests)                                                                    |                 |
| 30 |                                                           |     |                                                                                                               |                 |
| 31 |                                                           | 11d | Relevant concomitant care and interventions that are permitted or prohibited during the trial                 | _____           |
| 32 |                                                           |     |                                                                                                               |                 |
| 33 | Outcomes                                                  | 12  | Primary, secondary, and other outcomes, including the specific measurement variable (eg, systolic blood       | _____ 7 _____   |
| 34 |                                                           |     | pressure), analysis metric (eg, change from baseline, final value, time to event), method of aggregation (eg, |                 |
| 35 |                                                           |     | median, proportion), and time point for each outcome. Explanation of the clinical relevance of chosen         |                 |
| 36 |                                                           |     | efficacy and harm outcomes is strongly recommended                                                            |                 |
| 37 |                                                           |     |                                                                                                               |                 |
| 38 | Participant timeline                                      | 13  | Time schedule of enrolment, interventions (including any run-ins and washouts), assessments, and visits for   | _____ 7 _____   |
| 39 |                                                           |     | participants. A schematic diagram is highly recommended (see Figure)                                          |                 |
| 40 |                                                           |     |                                                                                                               |                 |
| 41 |                                                           |     |                                                                                                               |                 |
| 42 |                                                           |     |                                                                                                               |                 |
| 43 |                                                           |     |                                                                                                               |                 |
| 44 |                                                           |     |                                                                                                               |                 |
| 45 |                                                           |     |                                                                                                               |                 |
| 46 |                                                           |     |                                                                                                               |                 |

|   |             |    |                                                                                                                                                                                       |             |
|---|-------------|----|---------------------------------------------------------------------------------------------------------------------------------------------------------------------------------------|-------------|
| 1 | Sample size | 14 | Estimated number of participants needed to achieve study objectives and how it was determined, including clinical and statistical assumptions supporting any sample size calculations | _____8_____ |
| 2 |             |    |                                                                                                                                                                                       |             |
| 3 |             |    |                                                                                                                                                                                       |             |
| 4 | Recruitment | 15 | Strategies for achieving adequate participant enrolment to reach target sample size                                                                                                   | _____8_____ |
| 5 |             |    |                                                                                                                                                                                       |             |

### 6 **Methods: Assignment of interventions (for controlled trials)**

#### 7 Allocation:

|    |                    |     |                                                                                                                                                                                                                                                                                                                                                          |             |
|----|--------------------|-----|----------------------------------------------------------------------------------------------------------------------------------------------------------------------------------------------------------------------------------------------------------------------------------------------------------------------------------------------------------|-------------|
| 8  |                    |     |                                                                                                                                                                                                                                                                                                                                                          |             |
| 9  |                    |     |                                                                                                                                                                                                                                                                                                                                                          |             |
| 10 | Sequence           | 16a | Method of generating the allocation sequence (eg, computer-generated random numbers), and list of any factors for stratification. To reduce predictability of a random sequence, details of any planned restriction (eg, blocking) should be provided in a separate document that is unavailable to those who enrol participants or assign interventions | _____7_____ |
| 11 | generation         |     |                                                                                                                                                                                                                                                                                                                                                          |             |
| 12 |                    |     |                                                                                                                                                                                                                                                                                                                                                          |             |
| 13 |                    |     |                                                                                                                                                                                                                                                                                                                                                          |             |
| 14 |                    |     |                                                                                                                                                                                                                                                                                                                                                          |             |
| 15 |                    |     |                                                                                                                                                                                                                                                                                                                                                          |             |
| 16 | Allocation         | 16b | Mechanism of implementing the allocation sequence (eg, central telephone; sequentially numbered, opaque, sealed envelopes), describing any steps to conceal the sequence until interventions are assigned                                                                                                                                                | _____7_____ |
| 17 | concealment        |     |                                                                                                                                                                                                                                                                                                                                                          |             |
| 18 | mechanism          |     |                                                                                                                                                                                                                                                                                                                                                          |             |
| 19 |                    |     |                                                                                                                                                                                                                                                                                                                                                          |             |
| 20 | Implementation     | 16c | Who will generate the allocation sequence, who will enrol participants, and who will assign participants to interventions                                                                                                                                                                                                                                | _____7_____ |
| 21 |                    |     |                                                                                                                                                                                                                                                                                                                                                          |             |
| 22 |                    |     |                                                                                                                                                                                                                                                                                                                                                          |             |
| 23 |                    |     |                                                                                                                                                                                                                                                                                                                                                          |             |
| 24 | Blinding (masking) | 17a | Who will be blinded after assignment to interventions (eg, trial participants, care providers, outcome assessors, data analysts), and how                                                                                                                                                                                                                | _____7_____ |
| 25 |                    |     |                                                                                                                                                                                                                                                                                                                                                          |             |
| 26 |                    |     |                                                                                                                                                                                                                                                                                                                                                          |             |
| 27 |                    | 17b | If blinded, circumstances under which unblinding is permissible, and procedure for revealing a participant's allocated intervention during the trial                                                                                                                                                                                                     | _____7_____ |
| 28 |                    |     |                                                                                                                                                                                                                                                                                                                                                          |             |
| 29 |                    |     |                                                                                                                                                                                                                                                                                                                                                          |             |
| 30 |                    |     |                                                                                                                                                                                                                                                                                                                                                          |             |

### 31 **Methods: Data collection, management, and analysis**

|    |                 |     |                                                                                                                                                                                                                                                                                                                                                                                                              |             |
|----|-----------------|-----|--------------------------------------------------------------------------------------------------------------------------------------------------------------------------------------------------------------------------------------------------------------------------------------------------------------------------------------------------------------------------------------------------------------|-------------|
| 32 |                 |     |                                                                                                                                                                                                                                                                                                                                                                                                              |             |
| 33 | Data collection | 18a | Plans for assessment and collection of outcome, baseline, and other trial data, including any related processes to promote data quality (eg, duplicate measurements, training of assessors) and a description of study instruments (eg, questionnaires, laboratory tests) along with their reliability and validity, if known. Reference to where data collection forms can be found, if not in the protocol | _____9_____ |
| 34 | methods         |     |                                                                                                                                                                                                                                                                                                                                                                                                              |             |
| 35 |                 |     |                                                                                                                                                                                                                                                                                                                                                                                                              |             |
| 36 |                 |     |                                                                                                                                                                                                                                                                                                                                                                                                              |             |
| 37 |                 |     |                                                                                                                                                                                                                                                                                                                                                                                                              |             |
| 38 |                 |     |                                                                                                                                                                                                                                                                                                                                                                                                              |             |
| 39 |                 | 18b | Plans to promote participant retention and complete follow-up, including list of any outcome data to be collected for participants who discontinue or deviate from intervention protocols                                                                                                                                                                                                                    | _____9_____ |
| 40 |                 |     |                                                                                                                                                                                                                                                                                                                                                                                                              |             |
| 41 |                 |     |                                                                                                                                                                                                                                                                                                                                                                                                              |             |
| 42 |                 |     |                                                                                                                                                                                                                                                                                                                                                                                                              |             |

|    |                                 |     |                                                                                                                                                                                                                                                                                                                                       |              |
|----|---------------------------------|-----|---------------------------------------------------------------------------------------------------------------------------------------------------------------------------------------------------------------------------------------------------------------------------------------------------------------------------------------|--------------|
| 1  | Data management                 | 19  | Plans for data entry, coding, security, and storage, including any related processes to promote data quality (eg, double data entry; range checks for data values). Reference to where details of data management procedures can be found, if not in the protocol                                                                     | _____9_____  |
| 2  |                                 |     |                                                                                                                                                                                                                                                                                                                                       |              |
| 3  |                                 |     |                                                                                                                                                                                                                                                                                                                                       |              |
| 4  |                                 |     |                                                                                                                                                                                                                                                                                                                                       |              |
| 5  | Statistical methods             | 20a | Statistical methods for analysing primary and secondary outcomes. Reference to where other details of the statistical analysis plan can be found, if not in the protocol                                                                                                                                                              | _____8_____  |
| 6  |                                 |     |                                                                                                                                                                                                                                                                                                                                       |              |
| 7  |                                 |     |                                                                                                                                                                                                                                                                                                                                       |              |
| 8  |                                 | 20b | Methods for any additional analyses (eg, subgroup and adjusted analyses)                                                                                                                                                                                                                                                              | _____8_____  |
| 9  |                                 |     |                                                                                                                                                                                                                                                                                                                                       |              |
| 10 |                                 | 20c | Definition of analysis population relating to protocol non-adherence (eg, as randomised analysis), and any statistical methods to handle missing data (eg, multiple imputation)                                                                                                                                                       | _____8_____  |
| 11 |                                 |     |                                                                                                                                                                                                                                                                                                                                       |              |
| 12 |                                 |     |                                                                                                                                                                                                                                                                                                                                       |              |
| 13 |                                 |     |                                                                                                                                                                                                                                                                                                                                       |              |
| 14 | <b>Methods: Monitoring</b>      |     |                                                                                                                                                                                                                                                                                                                                       |              |
| 15 |                                 |     |                                                                                                                                                                                                                                                                                                                                       |              |
| 16 | Data monitoring                 | 21a | Composition of data monitoring committee (DMC); summary of its role and reporting structure; statement of whether it is independent from the sponsor and competing interests; and reference to where further details about its charter can be found, if not in the protocol. Alternatively, an explanation of why a DMC is not needed | _____9_____  |
| 17 |                                 |     |                                                                                                                                                                                                                                                                                                                                       |              |
| 18 |                                 |     |                                                                                                                                                                                                                                                                                                                                       |              |
| 19 |                                 |     |                                                                                                                                                                                                                                                                                                                                       |              |
| 20 |                                 |     |                                                                                                                                                                                                                                                                                                                                       |              |
| 21 |                                 |     |                                                                                                                                                                                                                                                                                                                                       |              |
| 22 |                                 | 21b | Description of any interim analyses and stopping guidelines, including who will have access to these interim results and make the final decision to terminate the trial                                                                                                                                                               | _____9_____  |
| 23 |                                 |     |                                                                                                                                                                                                                                                                                                                                       |              |
| 24 |                                 |     |                                                                                                                                                                                                                                                                                                                                       |              |
| 25 | Harms                           | 22  | Plans for collecting, assessing, reporting, and managing solicited and spontaneously reported adverse events and other unintended effects of trial interventions or trial conduct                                                                                                                                                     | _____9_____  |
| 26 |                                 |     |                                                                                                                                                                                                                                                                                                                                       |              |
| 27 |                                 |     |                                                                                                                                                                                                                                                                                                                                       |              |
| 28 | Auditing                        | 23  | Frequency and procedures for auditing trial conduct, if any, and whether the process will be independent from investigators and the sponsor                                                                                                                                                                                           | _____10_____ |
| 29 |                                 |     |                                                                                                                                                                                                                                                                                                                                       |              |
| 30 |                                 |     |                                                                                                                                                                                                                                                                                                                                       |              |
| 31 |                                 |     |                                                                                                                                                                                                                                                                                                                                       |              |
| 32 | <b>Ethics and dissemination</b> |     |                                                                                                                                                                                                                                                                                                                                       |              |
| 33 |                                 |     |                                                                                                                                                                                                                                                                                                                                       |              |
| 34 | Research ethics approval        | 24  | Plans for seeking research ethics committee/institutional review board (REC/IRB) approval                                                                                                                                                                                                                                             | _____2_____  |
| 35 |                                 |     |                                                                                                                                                                                                                                                                                                                                       |              |
| 36 |                                 |     |                                                                                                                                                                                                                                                                                                                                       |              |
| 37 | Protocol amendments             | 25  | Plans for communicating important protocol modifications (eg, changes to eligibility criteria, outcomes, analyses) to relevant parties (eg, investigators, REC/IRBs, trial participants, trial registries, journals, regulators)                                                                                                      | _____10_____ |
| 38 |                                 |     |                                                                                                                                                                                                                                                                                                                                       |              |
| 39 |                                 |     |                                                                                                                                                                                                                                                                                                                                       |              |
| 40 |                                 |     |                                                                                                                                                                                                                                                                                                                                       |              |
| 41 |                                 |     |                                                                                                                                                                                                                                                                                                                                       |              |
| 42 |                                 |     |                                                                                                                                                                                                                                                                                                                                       |              |
| 43 |                                 |     |                                                                                                                                                                                                                                                                                                                                       |              |
| 44 |                                 |     |                                                                                                                                                                                                                                                                                                                                       |              |
| 45 |                                 |     |                                                                                                                                                                                                                                                                                                                                       |              |
| 46 |                                 |     |                                                                                                                                                                                                                                                                                                                                       |              |

|    |                               |     |                                                                                                                                                                                                                                                                                     |              |
|----|-------------------------------|-----|-------------------------------------------------------------------------------------------------------------------------------------------------------------------------------------------------------------------------------------------------------------------------------------|--------------|
| 1  | Consent or assent             | 26a | Who will obtain informed consent or assent from potential trial participants or authorised surrogates, and how (see Item 32)                                                                                                                                                        | _____6_____  |
| 2  |                               |     |                                                                                                                                                                                                                                                                                     |              |
| 3  |                               |     |                                                                                                                                                                                                                                                                                     |              |
| 4  |                               | 26b | Additional consent provisions for collection and use of participant data and biological specimens in ancillary studies, if applicable                                                                                                                                               | _____6_____  |
| 5  |                               |     |                                                                                                                                                                                                                                                                                     |              |
| 6  |                               |     |                                                                                                                                                                                                                                                                                     |              |
| 7  | Confidentiality               | 27  | How personal information about potential and enrolled participants will be collected, shared, and maintained in order to protect confidentiality before, during, and after the trial                                                                                                | _____9_____  |
| 8  |                               |     |                                                                                                                                                                                                                                                                                     |              |
| 9  |                               |     |                                                                                                                                                                                                                                                                                     |              |
| 10 | Declaration of interests      | 28  | Financial and other competing interests for principal investigators for the overall trial and each study site                                                                                                                                                                       | _____11_____ |
| 11 |                               |     |                                                                                                                                                                                                                                                                                     |              |
| 12 |                               |     |                                                                                                                                                                                                                                                                                     |              |
| 13 | Access to data                | 29  | Statement of who will have access to the final trial dataset, and disclosure of contractual agreements that limit such access for investigators                                                                                                                                     | _____9_____  |
| 14 |                               |     |                                                                                                                                                                                                                                                                                     |              |
| 15 |                               |     |                                                                                                                                                                                                                                                                                     |              |
| 16 | Ancillary and post-trial care | 30  | Provisions, if any, for ancillary and post-trial care, and for compensation to those who suffer harm from trial participation                                                                                                                                                       | _____9_____  |
| 17 |                               |     |                                                                                                                                                                                                                                                                                     |              |
| 18 |                               |     |                                                                                                                                                                                                                                                                                     |              |
| 19 |                               |     |                                                                                                                                                                                                                                                                                     |              |
| 20 | Dissemination policy          | 31a | Plans for investigators and sponsor to communicate trial results to participants, healthcare professionals, the public, and other relevant groups (eg, via publication, reporting in results databases, or other data sharing arrangements), including any publication restrictions | _____2_____  |
| 21 |                               |     |                                                                                                                                                                                                                                                                                     |              |
| 22 |                               |     |                                                                                                                                                                                                                                                                                     |              |
| 23 |                               |     |                                                                                                                                                                                                                                                                                     |              |
| 24 |                               | 31b | Authorship eligibility guidelines and any intended use of professional writers                                                                                                                                                                                                      | _____2_____  |
| 25 |                               |     |                                                                                                                                                                                                                                                                                     |              |
| 26 |                               | 31c | Plans, if any, for granting public access to the full protocol, participant-level dataset, and statistical code                                                                                                                                                                     | _____2_____  |
| 27 |                               |     |                                                                                                                                                                                                                                                                                     |              |
| 28 |                               |     |                                                                                                                                                                                                                                                                                     |              |
| 29 | <b>Appendices</b>             |     |                                                                                                                                                                                                                                                                                     |              |
| 30 |                               |     |                                                                                                                                                                                                                                                                                     |              |
| 31 | Informed consent materials    | 32  | Model consent form and other related documentation given to participants and authorised surrogates                                                                                                                                                                                  | _____NA_____ |
| 32 |                               |     |                                                                                                                                                                                                                                                                                     |              |
| 33 |                               |     |                                                                                                                                                                                                                                                                                     |              |
| 34 | Biological specimens          | 33  | Plans for collection, laboratory evaluation, and storage of biological specimens for genetic or molecular analysis in the current trial and for future use in ancillary studies, if applicable                                                                                      | _____NA_____ |
| 35 |                               |     |                                                                                                                                                                                                                                                                                     |              |
| 36 |                               |     |                                                                                                                                                                                                                                                                                     |              |

\*It is strongly recommended that this checklist be read in conjunction with the SPIRIT 2013 Explanation & Elaboration for important clarification on the items. Amendments to the protocol should be tracked and dated. The SPIRIT checklist is copyrighted by the SPIRIT Group under the Creative Commons [“Attribution-NonCommercial-NoDerivs 3.0 Unported”](https://creativecommons.org/licenses/by-nc-nd/3.0/) license.

# BMJ Open

## Pretreatment with transcutaneous electrical acupoint stimulation to prevent postoperative ileus in patients undergoing laparoscopic colon surgery: study protocol for a randomized controlled trial

|                                 |                                                                                                                                                                                                                                                                                                                                                                                                                                                                                                                                                                                                                                                                                                                                                                                                                                                                                                                                                                                                                                                                                                                                                                                                                                                                                                                                                                                                                                                                                                                          |
|---------------------------------|--------------------------------------------------------------------------------------------------------------------------------------------------------------------------------------------------------------------------------------------------------------------------------------------------------------------------------------------------------------------------------------------------------------------------------------------------------------------------------------------------------------------------------------------------------------------------------------------------------------------------------------------------------------------------------------------------------------------------------------------------------------------------------------------------------------------------------------------------------------------------------------------------------------------------------------------------------------------------------------------------------------------------------------------------------------------------------------------------------------------------------------------------------------------------------------------------------------------------------------------------------------------------------------------------------------------------------------------------------------------------------------------------------------------------------------------------------------------------------------------------------------------------|
| Journal:                        | <i>BMJ Open</i>                                                                                                                                                                                                                                                                                                                                                                                                                                                                                                                                                                                                                                                                                                                                                                                                                                                                                                                                                                                                                                                                                                                                                                                                                                                                                                                                                                                                                                                                                                          |
| Manuscript ID                   | bmjopen-2019-030694.R2                                                                                                                                                                                                                                                                                                                                                                                                                                                                                                                                                                                                                                                                                                                                                                                                                                                                                                                                                                                                                                                                                                                                                                                                                                                                                                                                                                                                                                                                                                   |
| Article Type:                   | Protocol                                                                                                                                                                                                                                                                                                                                                                                                                                                                                                                                                                                                                                                                                                                                                                                                                                                                                                                                                                                                                                                                                                                                                                                                                                                                                                                                                                                                                                                                                                                 |
| Date Submitted by the Author:   | 26-Feb-2020                                                                                                                                                                                                                                                                                                                                                                                                                                                                                                                                                                                                                                                                                                                                                                                                                                                                                                                                                                                                                                                                                                                                                                                                                                                                                                                                                                                                                                                                                                              |
| Complete List of Authors:       | <p>Wang, Jian; Shuguang Hospital Affiliated to Shanghai University of Traditional Chinese Medicine</p> <p>Li, Dongli; Wenzhou Medical University, the sixth Affiliated Hospital, Anesthesiology</p> <p>Tang, Wei; Shuguang Hospital Affiliated to Shanghai University of Traditional Chinese Medicine, Anesthesiology</p> <p>Guo, Jun; Shuguang Hospital Affiliated to Shanghai University of Traditional Chinese Medicine, Anesthesiology</p> <p>Chen, Wenting; Shuguang Hospital Affiliated to Shanghai University of Traditional Chinese Medicine, Anesthesiology</p> <p>Yong, Yue; Shuguang Hospital Affiliated to Shanghai University of Traditional Chinese Medicine, Anesthesiology</p> <p>Song, Wei; Shuguang Hospital Affiliated to Shanghai University of Traditional Chinese Medicine</p> <p>Yu, Guijie; Shuguang Hospital Affiliated to Shanghai University of Traditional Chinese Medicine, Anesthesiology</p> <p>Feng, Rui; Shuguang Hospital Affiliated to Shanghai University of Traditional Chinese Medicine, Anesthesiology</p> <p>Yuan, Lan; Shuguang Hospital Affiliated to Shanghai University of Traditional Chinese Medicine, Anesthesiology</p> <p>Fu, Guoqiang; Shuguang Hospital Affiliated to Shanghai University of Traditional Chinese Medicine, Anesthesiology</p> <p>Song, Jiangang; Shuguang Hospital Affiliated to Shanghai University of Traditional Chinese Medicine, Anesthesiology</p> <p>Fan, Lihua; Wenzhou Medical University, the sixth Affiliated Hospital, Anesthesiology</p> |
| <b>Primary Subject Heading</b>: | Complementary medicine                                                                                                                                                                                                                                                                                                                                                                                                                                                                                                                                                                                                                                                                                                                                                                                                                                                                                                                                                                                                                                                                                                                                                                                                                                                                                                                                                                                                                                                                                                   |
| Secondary Subject Heading:      | Anaesthesia, Gastroenterology and hepatology, Surgery                                                                                                                                                                                                                                                                                                                                                                                                                                                                                                                                                                                                                                                                                                                                                                                                                                                                                                                                                                                                                                                                                                                                                                                                                                                                                                                                                                                                                                                                    |
| Keywords:                       | Transcutaneous electrical acupoint stimulation (TEAS), postoperative ileus (POI), Pretreatment                                                                                                                                                                                                                                                                                                                                                                                                                                                                                                                                                                                                                                                                                                                                                                                                                                                                                                                                                                                                                                                                                                                                                                                                                                                                                                                                                                                                                           |
|                                 |                                                                                                                                                                                                                                                                                                                                                                                                                                                                                                                                                                                                                                                                                                                                                                                                                                                                                                                                                                                                                                                                                                                                                                                                                                                                                                                                                                                                                                                                                                                          |

1  
2  
3  
4  
5  
6  
7  
8  
9  
10  
11  
12  
13  
14  
15  
16  
17  
18  
19  
20  
21  
22  
23  
24  
25  
26  
27  
28  
29  
30  
31  
32  
33  
34  
35  
36  
37  
38  
39  
40  
41  
42  
43  
44  
45  
46  
47  
48  
49  
50  
51  
52  
53  
54  
55  
56  
57  
58  
59  
60





I, the Submitting Author has the right to grant and does grant on behalf of all authors of the Work (as defined in the below author licence), an exclusive licence and/or a non-exclusive licence for contributions from authors who are: i) UK Crown employees; ii) where BMJ has agreed a CC-BY licence shall apply, and/or iii) in accordance with the terms applicable for US Federal Government officers or employees acting as part of their official duties; on a worldwide, perpetual, irrevocable, royalty-free basis to BMJ Publishing Group Ltd ("BMJ") its licensees and where the relevant Journal is co-owned by BMJ to the co-owners of the Journal, to publish the Work in this journal and any other BMJ products and to exploit all rights, as set out in our [licence](#).

The Submitting Author accepts and understands that any supply made under these terms is made by BMJ to the Submitting Author unless you are acting as an employee on behalf of your employer or a postgraduate student of an affiliated institution which is paying any applicable article publishing charge ("APC") for Open Access articles. Where the Submitting Author wishes to make the Work available on an Open Access basis (and intends to pay the relevant APC), the terms of reuse of such Open Access shall be governed by a Creative Commons licence – details of these licences and which [Creative Commons](#) licence will apply to this Work are set out in our licence referred to above.

Other than as permitted in any relevant BMJ Author's Self Archiving Policies, I confirm this Work has not been accepted for publication elsewhere, is not being considered for publication elsewhere and does not duplicate material already published. I confirm all authors consent to publication of this Work and authorise the granting of this licence.

1  
2  
3  
4 1 **Pretreatment with transcutaneous electrical acupoint stimulation to prevent**  
5  
6 2 **postoperative ileus in patients undergoing laparoscopic colon surgery: study protocol for**  
7  
8 3 **a randomized controlled trial**  
9  
10 4

11 5 Wang, Jian MD<sup>1,#</sup>; Li, Dongli MD<sup>2,#</sup>; Tang, Wei MD<sup>1</sup>; Guo, Jun MD<sup>1</sup>; Chen, Wenting MD<sup>1</sup>;  
12 6 Yong, Yue MD<sup>1</sup>; Song, Wei<sup>1</sup>; Yu, Guijie MD<sup>1</sup>; Feng, Rui MD<sup>1</sup>; Yuan, Lan MD<sup>1</sup>; Fu, Guoqiang  
13 7 MD<sup>1</sup>; Song, Jiangang MD<sup>1,\*</sup>; Fan, Lihua MD<sup>2,\*</sup>  
14  
15  
16  
17  
18  
19

20 9 <sup>1</sup>Department of Anesthesiology, Shuguang Hospital Affiliated to Shanghai University of  
21  
22 10 Traditional Chinese Medicine, Shanghai, China  
23

24 11 <sup>2</sup>Department of Anesthesiology, Wenzhou Medical University, the sixth Affiliated Hospital,  
25  
26 12 Lishui 323000, China  
27  
28  
29

30 14 #These authors contributed equally to this work.  
31  
32  
33

34 16 \*Corresponding Author: Li-hua Fan. Department of Anesthesiology, Wenzhou Medical  
35  
36 17 University, the sixth Affiliated Hospital, Lishui 323000, China; Email: fanlihua\_ls@126.com.  
37  
38 18 Jian-gang Song, Department of Anesthesiology, Shuguang Hospital Affiliated to Shanghai  
39  
40 19 University of Traditional Chinese Medicine, Shanghai 201203, China. email:  
41  
42 20 songjg1993@126.com  
43  
44 21



1  
2  
3  
4 22 **Abstract**

5 23 **Introduction:** Postoperative ileus (POI), a common complication after surgery, severely affects  
6  
7  
8 24 postoperative recovery. It is unclear whether pretreatment with transcutaneous electrical  
9  
10 25 acupoint stimulation (TEAS) can improve recovery from POI. This trial will evaluate the effects  
11  
12 26 of pretreatment with TEAS on POI.

13  
14 27 **Methods and analysis:** This will be a prospective, randomized, controlled trial. ASA I–III  
15  
16 28 level patients, aged 18–75 years and scheduled for laparoscopic colon surgery, will be included  
17  
18 29 in the study. It is planned that 146 subjects will be randomized to the TEAS and sham TEAS  
19  
20 30 (STEAS) groups. The groups will undergo two sessions of TEAS/STEAS daily for three days  
21  
22 31 before surgery, with a final TEAS/STEAS treatment 30 minutes before anesthesia. The primary  
23  
24 32 endpoint of the study will be time to first defecation. Secondary endpoints will include time to  
25  
26 33 first flatus, time to tolerance of oral diet, GI-2 (composite outcome of time to first defecation  
27  
28 34 and time to tolerance of oral diet), time to independent walking , length of hospital stay,  
29  
30 35 postoperative pain VAS score on the first three days after surgery, analgesic requirements,  
31  
32 36 complications, and plasma concentrations of IFN- $\beta$ , IFN- $\gamma$ , IL-6 and IL-1 $\beta$ . Multiple linear  
33  
34 37 regression will be used to identify independent predictors of outcome measures.

35  
36 38 **Ethics and dissemination:** This study has been approved by the Chinese Registered Clinical  
37  
38 39 Trial Ethics Review Committee (NO.ChiECRCT-20170084). The results of the trial will be  
39  
40 40 published in an international peer-reviewed journal.

41 41 **Trial registration:** This study has been registered with the Chinese Clinical Trial Registry (NO.  
42  
43 42 ChiCTR-INR-17013184).

44 43 **Trial status:** The study was in the recruitment phase at the time of manuscript submission.

45 44 **Abbreviations:** POI = postoperative ileus, TCM = traditional Chinese medicine, EA = electro-  
46  
47 45 acupuncture, TEAS = transcutaneous electrical acupoint stimulation, BIS = bispectral index,  
48  
49 46 PACU = post anesthesia care unit, ERAS= enhanced recovery after surgery.

50  
51 47 **Key words:** transcutaneous electrical acupoint stimulation (TEAS); postoperative ileus (POI);  
52  
53 48 pretreatment.  
54  
55  
56  
57  
58  
59  
60

1  
2  
3  
4 49 Strengths and limitations of the study

5 50

6  
7 51 ➤ This study aims to evaluate whether pretreatment with transcutaneous electrical  
8 52 acupoint stimulation (TEAS) can prevent postoperative ileus (POI).

9 53 ➤ TEAS is a safe, noninvasive and easily accepted adjunctive intervention.

10  
11 54 ➤ This study will provide deeper insights into the mechanism by which TEAS  
12 55 pretreatment reduces the inflammatory response.

13  
14 56 ➤ This is a single-center study, which is a potential limitation.  
15  
16  
17  
18  
19  
20  
21  
22  
23  
24  
25  
26  
27  
28  
29  
30  
31  
32  
33  
34  
35  
36  
37  
38  
39  
40  
41  
42  
43  
44  
45  
46  
47  
48  
49  
50  
51  
52  
53  
54  
55  
56  
57  
58  
59  
60

For peer review only

## 57 Introduction

58 Postoperative ileus (POI) is a transient dysfunction of gastrointestinal propulsion that often  
59 occurs after abdominal surgery and may also occur following surgery at other sites<sup>1</sup>. The main  
60 symptoms of POI include abdominal pain and distention, nausea, vomiting, difficult defecation  
61 and intolerance to solid food. POI is usually temporary, but if prolonged, may lead to surgical  
62 incision dehiscence, intestinal anastomotic fistula, abdominal cavity infection, intestinal  
63 ischemia, aspiration pneumonia and other serious complications<sup>2-4</sup>. A retrospective cohort study  
64 involving nearly 500 hospitals in the United States showed that POI is a key reason for  
65 prolonged hospitalization and increased medical costs for patients undergoing abdominal  
66 surgery<sup>1</sup>. The United States spends more than \$1.46 billion treating POI every year<sup>5</sup>. At present,  
67 the most common methods used to treat POI include: rational perioperative use of narcotic  
68 drugs and opioids, eating as soon as possible after surgery, avoidance of nasogastric tubes after  
69 the operation, early ambulation, postoperative epidural analgesia, restriction of fluid intake, the  
70 use of minimally invasive surgery (such as laparoscopic), drug therapy and the use of chewing  
71 gum. Despite the numerous treatment strategies, POI remains a difficult clinical challenge that  
72 compromises the rapid recovery of postoperative patients. It is, therefore, necessary to find  
73 more effective, convenient and economical treatment methods<sup>6-10</sup>.

74 The main mechanism underlying POI may be activation of macrophages in the external  
75 muscular layer during the surgical procedure<sup>11</sup>. Intestinal manipulation during surgery can  
76 activate macrophages in the outer muscle layer of the small intestine, leading to release of  
77 inflammatory factors (IL-6, IL-1 $\beta$ ) and the chemokine MIP-1 $\alpha$ , together with increased  
78 expression of the adhesion molecule ICAM-1 on endothelial cells and induction of neutrophils  
79 and monocytes in the circulation into the small intestine muscle layer. These cells, and activated  
80 macrophages, can release a large amount of inducible nitric oxide synthase (iNOS) and  
81 prostaglandin, which inhibit the movement and contraction of the gastrointestinal tract<sup>12,13</sup>.  
82 Transport of these inflammatory mediators in the blood stream causes activation of  
83 macrophages in the distal gastrointestinal tract, leading to postoperative ileus over the entire

1  
2  
3  
4 84 intestinal tract<sup>14</sup>. It has been confirmed by a large number of animal experiments that reducing  
5 85 the inflammatory response is an effective way to treat POI<sup>15-17</sup>.

6  
7 86 There is a long history in traditional Chinese medicine (TCM) of using acupuncture to treat  
8  
9 87 functional gastrointestinal diseases and, in recent years, there has been significant global  
10 88 interest in the beneficial effects of acupuncture on POI. The positive effect of  
11  
12 89 electroacupuncture (EA) on POI has been clearly demonstrated. Ng *et al.* used EA to treat POI  
13  
14 90 in patients undergoing laparoscopic colon surgery<sup>18</sup>. Defecation time and length of hospital stay  
15  
16 91 were significantly shortened in patients who received EA compared with those who did not  
17  
18 92 receive the treatment. In patients undergoing hepatic resection, You *et al.* found a significant  
19  
20 93 reduction in the incidence of POI in patients treated with a combination of acupuncture and  
21  
22 94 Chinese herbal medicine. The length of hospitalization was also significantly shortened in the  
23  
24 95 treated group ( $14.0 \pm 4.9$  d vs  $16.5 \pm 6.8$  d,  $P = 0.014$ )<sup>19</sup>.

25  
26  
27 96 In previous studies, we proved that pretreatment with acupuncture could reduce excessive  
28  
29 97 activation of the innate immune system and inhibit the inflammatory response. This effect may  
30  
31 98 be achieved by activation of the vagal nervous system<sup>20,21</sup>. Other studies have shown that  
32  
33 99 transcutaneous electrical acupoint stimulation (TEAS) and EA have similar effects in the  
34  
35 100 treatment of pain and alleviating the inflammatory response<sup>22,23</sup>.

36  
37  
38 101 Traditional Chinese medicine holds that the best treatment for disease is prevention. Based on  
39  
40 102 all of the above studies, we hypothesize that the use of TEAS as a preoperative treatment may  
41  
42 103 reduce the incidence of POI. There have, so far, not been any studies that address this question.  
43  
44 104 We have, therefore, designed a randomized, controlled trial to investigate whether pretreatment  
45  
46 105 with TEAS can reduce the incidence of POI in patients undergoing laparoscopic colon resection.  
47  
48 106 The study is also designed to verify that the anti-inflammatory effect is associated with the  
49  
50 107 immunomodulatory function of TEAS.

51  
52 108

## 53 54 109 **Methods and analysis**

### 55 56 110 ***Study objective***

1  
2  
3  
4 111 The primary objective is to assess the effect of TEAS on clinical recovery of bowel function  
5  
6 112 after laparoscopic colon surgery. The secondary objective is to verify that suppression of  
7  
8 113 overactivation of the innate immune system and reduction of the inflammatory response are the  
9  
10 114 mechanisms underlying the ability of pretreatment of percutaneous acupuncture to prevent POI.

11  
12 115 ***Study location***

13  
14 116 A prospective, single-center, double-blinded, randomized, controlled trial will be conducted at  
15  
16 117 Shuguang Hospital, which is affiliated to the Shanghai University of Traditional Chinese  
17  
18 118 Medicine, China.

19  
20 119 ***Study population***

21  
22 120 Participants will be recruited according to the inclusion and exclusion criteria.

23  
24 121 **Inclusion criteria**

- 25  
26 122 1. Male and female patients aged 18–75 years  
27  
28 123 2. Patients undergoing elective laparoscopic colonic surgery and upper rectal resection (such  
29  
30 124 as left colectomy, right colectomy, and anterior resection of the upper part of the rectum  
31  
32 125 and lower part of the sigmoid)  
33  
34 126 3. Body mass index (BMI) 18–31 kg/m<sup>2</sup>  
35  
36 127 4. ASA classification I–III  
37  
38 128 5. Patients provide signed informed consent

39  
40 129 **Exclusion criteria**

- 41  
42 130 1. Middle and lower rectal resection, total/proctocolectomy or the need for complex  
43  
44 131 endoscopic surgery  
45  
46 132 2. Need for abdominal wall fistula, gastrointestinal fistula, fistula surgery or stoma creation  
47  
48 133 3. History of abdominal/pelvic operations or complications  
49  
50 134 4. Patients receiving epidural anesthesia or epidural analgesia  
51  
52 135 5. Patients with skin infections, surgical incision or scar at the point of application of  
53  
54 136 acupuncture  
55  
56 137 6. Patients have a history of limb surgery, spinal surgery or nerve injury  
57  
58  
59  
60

- 1  
2  
3  
4 138 7. Patients who participated in other clinical trials, or received other acupuncture therapy, in  
5  
6 139 the previous four weeks  
7  
8 140 8. Patients with cardiac pacemakers  
9  
10 141 9. Patients have one of the following conditions before surgery: chronic pain, drug  
11  
12 142 addiction or alcohol dependence  
13  
14 143 10. Patients with preoperative combination of severe central nervous system disease and  
15  
16 144 severe mental illness

17  
18 145 **Endpoints**

19  
20 146 **Primary endpoint**

21  
22 147 First defecation time (h) i.e., time to first anal defecation after laparoscopic surgery.

23  
24 148 **Secondary endpoints**

25  
26 149 Time to first flatus (h), time to tolerance of solid oral diet (h), GI-2 (composite outcome of time  
27  
28 150 to first defecation and time to tolerance of oral diet), time to walk independently (h), length of  
29  
30 151 hospital stay, defined as number of days from operation to discharge (d). Criteria for hospital  
31  
32 152 discharge include stability of vital signs with no fever, achievement of flatus or defecation,  
33  
34 153 ability to tolerate solid food without vomiting, control of postoperative pain, absence of other  
35  
36 154 postoperative complications and ability to function at home independently or with home care  
37  
38 155 provided. Pain will be assessed using the visual analogue scale (VAS) on postoperative days 1,  
39  
40 156 2 and 3 (scale of 0 to 10, where 0 represents complete absence of pain and 10 represent the  
41  
42 157 worst pain intensity). Postoperative requirements for analgesia will also be assessed.  
43  
44 158 Inflammatory mediators (IFN- $\beta$ , IFN- $\gamma$ , IL-6 and IL-1 $\beta$ ) in blood will be measured before  
45  
46 159 TEAS/STEAS intervention and on days 1, 3 and 5 after the operation. Postoperative  
47  
48 160 complications will be recorded using the Clavien - Dindo classification for complication  
49  
50 161 assessment<sup>24</sup>. The follow-up period will be at least 6 months.

51  
52 162 **Randomization and blinding**

53  
54 163 Patients will be randomized to receive either TEAS or STEAS by stratified randomization  
55  
56 164 according to sex, in a 1:1 ratio (Figure 1). Using a computer-generated random sequence, a  
57  
58 165 sealed envelope will be opened to determine to which group the patient has been assigned. The  
59  
60

1  
2  
3  
4 166 acupuncturist will be aware of the treatment group. Patients as well as the outcome investigator  
5  
6 167 (nurse anesthetist) , will be blinded to the treatment allocation.  
7

#### 8 168 ***Current sample size justification***

9  
10 169 According to Wang Jian and Song Jiangan's preliminary study of transcutaneous electrical  
11  
12 170 acupoint stimulation pretreatment for prevention of postoperative ileus in patients undergoing  
13  
14 171 laparoscopic colon surgery in Shuguang Hospital, the mean time to first defecation following  
15  
16 172 laparoscopic colon surgery was  $62 \pm 19$  h ( $M \pm SD$ ). Working on the assumption that a clinically  
17  
18 173 meaningful difference in mean time to first defecation between the TEAS and STEAS groups  
19  
20 174 is 1 day or 24 h, 66 patients would be needed in each group to reach a power of 80% and a 5%  
21  
22 175 Type I error rate. If the drop-out rate is 10%, a total sample size of 146 patients for the two  
23  
24 176 groups is needed for this study.  
25

#### 26 177 ***Statistical analysis***

27  
28 178 Data for continuous variables (i.e., first defecation time, first passage of flatus, time to tolerance  
29  
30 179 of oral diet, time to walking independently, length of hospital stay) will be reported using the  
31  
32 180 mean and standard deviation ( $M \pm SD$ ) for normally distributed data or median (range) for  
33  
34 181 skewed data. Data for categorical variables will be expressed as a number (percentage).  
35  
36 182 Intergroup differences will be assessed using the Student's t-test or Mann-Whitney U test.  
37  
38 183 Intergroup differences in inflammatory mediators (at time points of pre-TEAS/STEAS  
39  
40 184 treatment, and on post-operative days 1, 3, and 5) were assessed by two-way repeated measures  
41  
42 185 analysis of variance with Bonferroni post hoc test. The significance level will be set at 5%. All  
43  
44 186 data will be analyzed using SPSS 17.0 software or other appropriate statistical software  
45  
46 187 packages.  
47

#### 48 188 ***Pretreatment***

49  
50 189 Patients randomized to the TEAS and STEAS groups will undergo two treatment sessions daily  
51  
52 190 for three consecutive days before surgery. The patients will then be treated for a final time 30  
53  
54 191 minutes before anesthesia.  
55

56 192 For patients in the TEAS group, the Zusanli (ST-36), Shangjuxu (ST-37), Hegu (LI-4) and  
57  
58 193 Neiguan (P-6) acupoints will be identified before electrical stimulation with surface electrodes  
59  
60

1  
2  
3  
4 194 (Figure 2). Selection of these acupoints is based on a consensus between the acupuncturists  
5  
6 195 carrying out the study. The acupuncturist will stimulate these acupoints using a Han's acupoint  
7  
8 196 nerve stimulator (HANS200A, Nanjing Jisheng Medical Technology Co., Ltd., Nanjing, China),  
9  
10 197 at a frequency of 100 Hz. The intensity will be adjusted for each individual to maintain a slight  
11  
12 198 twitching of the regional muscle and achieve De-Qi sensations, such as soreness, numbness,  
13  
14 199 distention and heaviness. The STEAS group will receive a strong, but comfortable current for  
15  
16 200 30 s, and the current will then gradually vanish over the next 15 s<sup>25</sup>. The participants of both  
17  
18 201 groups will be told that they are receiving current stimulation. Each session of acupoints  
19  
20 202 treatment will last for 30 min. During the application of TEAS, patients will be required not to  
21  
22 203 change the current settings themselves. A prompt beep at the end of TEAS will indicate the end  
23  
24 204 of treatment.

25  
26 205 All surgery will be carried out under general anesthesia, using standardized anesthetic  
27  
28 206 procedures. Patients will be fasted for 12 h before surgery. Right upper extremity venous access  
29  
30 207 will be established before the patients entering the operating theater. Ringer's lactate solution  
31  
32 208 (8 mL/kg) will be administered by intravenous infusion for compensatory expansion before  
33  
34 209 induction of anesthesia. Patients will then receive midazolam (0.04 mg/kg), fentanyl (3 µg/kg),  
35  
36 210 vecuronium bromide (0.1 mg/kg) and propofol (1.5–2.0 mg/kg) intravenously for induction of  
37  
38 211 anesthesia. Anesthesia will be maintained using a CP-600 anesthesia delivery system (Slgo  
39  
40 212 Medical Technology Co., Ltd., Beijing, China). The dose of propofol will be adjusted to  
41  
42 213 maintain the bispectral index (BIS) in the range 40–60. After surgery, all patients will remain  
43  
44 214 in the post anesthesia care unit and then return to the ward for recovery until discharge.

45  
46 215 The perioperative management of all patients will be standardized. Early ambulation will be  
47  
48 216 encouraged and oral feeding will be resumed as early as possible. All patients will be followed-  
49  
50 217 up for at least 6 months after discharge from the hospital.

#### 51 52 218 *Adverse events*

53  
54 219 All adverse reactions will be closely monitored through spontaneous reports by patients or  
55  
56 220 direct observation by clinicians, or by asking the patients about adverse events using open  
57  
58  
59  
60



221 questions. All adverse reactions will be recorded and appropriate treatment will be provided if  
222 necessary. Serious adverse events will be reported to the ethics committee.

### 223 ***Data collection and management***

224 Demographic variables and clinical data will be collected from all patients. During the study,  
225 blood pressure, heart rate and oxygen saturation will also be monitored. Any adverse events  
226 will be recorded. Data will be collected throughout the study and will be securely managed  
227 under conditions of confidentiality. Data collection will be performed by a nurse anesthetist.  
228 The participants will be referred to by their participant number rather than by their name  
229 throughout the study, unless otherwise specified. All relevant documents and files will be  
230 archived for 5 years. The data will be accessible only by investigators who sign the confidential  
231 disclosure agreement and by institutional or governmental auditors during the study. Data  
232 without patient identifiers will be publicly accessible after the study. Data collection and  
233 management will be monitored by the Institutional Ethics Committee for Clinical Research of  
234 Shuguang Hospital.

### 235 ***Patient and public involvement***

236 This study is currently in the recruitment phase. The participants will be able to access the study  
237 results through social media.

### 238 **Discussion**

239 POI continues to represent an important cause of morbidity following colon surgery. The  
240 prevention of POI is thus of great importance in reducing perioperative complications and  
241 reducing hospitalization costs. Although it has been shown that EA can shorten the duration of  
242 POI<sup>18</sup>, the effectiveness of TEAS, which is a similar technique, in preventing POI has not been  
243 investigated. It is, therefore, important to assess the effectiveness of TEAS in preventing POI  
244 through a clinical study.

245 This study has several strengths. Firstly, the intervention strategy of the protocol will be  
246 pretreatment with TEAS. Previous studies have shown that pretreatment has a prophylactic  
247 effect. For example, pretreatment with TEAS has been shown to improve pain treatment<sup>26,27</sup>  
248 and to improve resuscitation after anesthesia, with reduction of postoperative nausea and

1  
2  
3  
4 249 vomiting<sup>28</sup>. It is, however, unclear whether preoperative TEAS can prevent POI. Studies  
5  
6 250 suggest that early preoperative intervention may be more beneficial in regulating physiological  
7  
8 251 functions and preventing POI<sup>29</sup>. In an extension to these findings, the present study will help to  
9  
10 252 determine whether TEAS pretreatment could improve POI.

11  
12 253 Secondly, the effectiveness of TEAS will be evaluated by assessing clinical function and by  
13  
14 254 serological examination. In this randomized controlled trial of patients undergoing laparoscopic  
15  
16 255 colorectal surgery, our aim is to assess the effects of preoperative TEAS on POI using relevant  
17  
18 256 clinical parameters associated with bowel function. These include time to first defecation, time  
19  
20 257 to first flatus, time to tolerance of oral diet and GI-2. Importantly, we will also measure serum  
21  
22 258 concentrations of inflammatory mediators associated with POI, such as IFN- $\beta$ , IFN- $\gamma$ , IL-6 and  
23  
24 259 IL-1 $\beta$ . Our findings may, thus, provide deeper insights into the mechanisms by which TEAS  
25  
26 260 improves POI.

27  
28 261 There are also limitations to this protocol. Various clinical indicators have been used in studies  
29  
30 262 for the diagnosis of POI, but there is no consensus on which clinical parameter is the best for  
31  
32 263 assessment of gastrointestinal (GI) transit<sup>9,30,31</sup>. Two indicators that are widely used to assess  
33  
34 264 bowel movement will be used in this study. Time to first defecation will be the primary outcome  
35  
36 265 and time to first flatus will be one of the secondary outcomes. There is a possibility that we  
37  
38 266 may observe conflicting results (i.e., significant improvement in time to flatus, but not  
39  
40 267 defecation). Because flatus can vary considerably between patients, clinical trials support the  
41  
42 268 time to tolerance of oral diet and GI-2 (defined as the later of the following two events: time to  
43  
44 269 first tolerance of solid food and time to first bowel movement) as supplementary  
45  
46 270 secondary outcomes to measure the recovery time of GI function and these will be used in this  
47  
48 271 study<sup>32,33</sup>. Other limitations of these indicators are that they require objective measurement of  
49  
50 272 motility and are time consuming to measure<sup>34,35</sup>. Recently, this situation has been improved by  
51  
52 273 the use of in vivo monitoring techniques to assess the function of gastrointestinal movements.  
53  
54 274 Innovative devices, such as Sitz markers, have been used to evaluate postoperative recovery of  
55  
56 275 small bowel movement by counting the number of Sitz markers that did not pass through the  
57  
58 276 ileocecal valve, but remained in the small intestine using radiography<sup>36</sup>. The SmartPill is a  
59  
60

1  
2  
3  
4 277 swallowable device that record parameters within the GI tract. Indicators, such as pH,  
5  
6 278 temperature and intracavitary pressure, can be collected to analyze gastrointestinal transit times  
7  
8 279 in vivo<sup>37</sup>. These devices acquire objective parameters to evaluate bowel movement and could  
9  
10 280 save time. Research into the satisfaction of both doctors and patients with these device needs  
11  
12 281 to be carried out. Furthermore, this study is a single-center trial and, because the therapeutic  
13  
14 282 effect of TEAS may be affected by ethnicity and region, it will be necessary to conduct multi-  
15  
16 283 center and large sample studies in the future.

17  
18 284 Notwithstanding its limitations, this study can clearly indicate the overall effects of TEAS on  
19  
20 285 postoperative recovery. We hypothesize that pretreatment with TEAS could improve recovery  
21  
22 286 of gastrointestinal function in patients undergoing laparoscopic surgery. If this study provides  
23  
24 287 positive results, it will be possible to recommend this pretreatment strategy for patients  
25  
26 288 undergoing abdominal surgery. Relevant cost-effectiveness studies are also worthy of  
27  
28 289 consideration.

#### 30 ***Acknowledgements***

31  
32 291 We thank Dr. Stanley Tao from Shanghai Ruihui Biotech for his valuable assistance in the  
33  
34 292 statistical design of this study.

#### 36 ***Funding***

37  
38 294 The present study is supported by the project of the National Natural Science Foundation of  
39  
40 295 China (No. 81703898, 81603702, 81603700 and 81774108) and the commercial sponsorship  
41  
42 296 of SINCH Pharmaceuticals Tech. Co., Ltd.

#### 44 ***Availability of data and materials***

45  
46 297  
47 298 The dataset to be generated during the study will be available from the corresponding author  
48  
49 299 on reasonable request via email.

#### 50 ***Author contributions***

51  
52 301 Jian Wang conceived the study. Dong-li Li, Wei Tang, Jun Guo and Guo-qiang Fu participated  
53  
54 302 in its design and coordination. Wen-ting Chen, Yue Yong, Wei Song and Jun Guo collected  
55  
56 303 references and developed the protocol. Gui-jie Yu and Lan Yuan will perform statistical  
57  
58 304 analyses. Rui Feng will follow-up with patients and record data. Jian Wang, Li-hua Fan and  
59  
60

1  
2  
3  
4  
5  
6  
7  
8  
9  
10  
11  
12  
13  
14  
15  
16  
17  
18  
19  
20  
21  
22  
23  
24  
25  
26  
27  
28  
29  
30  
31  
32  
33  
34  
35  
36  
37  
38  
39  
40  
41  
42  
43  
44  
45  
46  
47  
48  
49  
50  
51  
52  
53  
54  
55  
56  
57  
58  
59  
60

305 Jian-gang Song drafted the manuscript. All authors have read and approved the final manuscript.

306 ***Competing interests***

307 None declared.

For peer review only

309 **References**

- 310 1. Iyer S, Saunders WB, Stemkowski S. Economic burden of postoperative  
311 ileus associated with colectomy in the United States. *J Manag*  
312 *Care Pharm* 2009;15(6):485–94. doi: 10.18553/jmcp.2009.15.6.485
- 313 2. Boelens PG, Heesakkers FF, Luyer MD, et al. Reduction of  
314 postoperative ileus by early enteral nutrition in patients  
315 undergoing major rectal surgery: prospective, randomized,  
316 controlled trial. *Ann Surg* 2014;259(4):649–55. doi:  
317 10.1097/SLA.000000000000288
- 318 3. Melis M, Fichera A, Ferguson MK. Bowel necrosis associated with  
319 early jejunal tube feeding: A complication of postoperative  
320 enteral nutrition. *Arch Surg* 2006;141(7):701–4. doi:  
321 10.1001/archsurg.141.7.701
- 322 4. Moghadamyeghaneh Z, Hwang GS, Hanna MH, et al. Risk factors for  
323 prolonged ileus following colon surgery. *Surg Endosc*  
324 2016;30(2):603–09. doi: 10.1007/s00464-015-4247-1
- 325 5. Goldstein JL, Matuszewski KA, Delaney CP, et al. Inpatient economic  
326 burden of postoperative ileus associated with abdominal surgery  
327 in the United States. *P and T* 2007;32(2):82–90.
- 328 6. Bragg D, El-Sharkawy AM, Psaltis E, et al. Postoperative ileus:  
329 Recent developments in pathophysiology and management. *Clin Nutr*  
330 2015;34(3):367–76. doi: 10.1016/j.clnu.2015.01.016
- 331 7. Wolthuis AM, Bislenghi G, Fieuids S, et al. Incidence of prolonged  
332 postoperative ileus after colorectal surgery: a systematic  
333 review and meta-analysis. *Colorectal Dis* 2016;18(1):01–9. doi:  
334 10.1111/codi.13210
- 335 8. Nguyen DL, Maithel S, Nguyen ET, et al. Does Alvimopan enhance  
336 return of bowel function in laparoscopic gastrointestinal  
337 surgery? A meta-analysis. *Annals of Gastroenterology*  
338 2015;28(4):475–80.
- 339 9. van Bree SH, Nemethova A, Cailotto C, et al. New therapeutic  
340 strategies for postoperative ileus. *Nat Rev Gastroenterol*  
341 *Hepatol* 2012;9(11):675–83. doi: 10.1038/nrgastro.2012.134
- 342 10. Hilton WM, Lotan Y, Parekh DJ, et al. Alvimopan for prevention of  
343 postoperative paralytic ileus in radical cystectomy patients: a  
344 cost-effectiveness analysis. *BJU Int* 2013;111(7):1054–60. doi:  
345 10.1111/j.1464-410X.2012.11499.x
- 346 11. Wehner S, Behrendt FF, Lyutenski BN, et al. Inhibition of  
347 macrophage function prevents intestinal inflammation and  
348 postoperative ileus in rodents. *Gut* 2007;56(2):176–85. doi:  
349 10.1136/gut.2005.089615

- 1  
2  
3 350 12. Wehner S, Straesser S, Vilz TO, et al. Inhibition of p38 mitogen-  
4 351 activated protein kinase pathway as prophylaxis of postoperative  
5 352 ileus in mice. *Gastroenterology* 2009;136(2):619-29. doi:  
6 353 10.1053/j.gastro.2008.10.017  
7  
8 354 13. Schwarz NT, Kalff JC, Turler A, et al. Prostanoid production via  
9 355 COX-2 as a causative mechanism of rodent postoperative ileus.  
10 356 *Gastroenterology* 2001;121(6):1354-71. doi:  
11 357 10.1053/gast.2001.29605  
12  
13 358 14. Engel DR, Koscielny A, Wehner S, et al. T helper type 1 memory  
14 359 cells disseminate postoperative ileus over the entire intestinal  
15 360 tract. *Nat Med* 2010;16(12):1407-13. doi: 10.1038/nm.2255  
16  
17 361 15. Adding LC, Bannenberg GL, Gustafsson LE. Basic experimental studies  
18 362 and clinical aspects of gadolinium salts and chelates. *Cardiovasc*  
19 363 *Drug Rev* 2001;19(1):41-56. doi: 10.1111/j.1527-  
20 364 3466.2001.tb00182.x  
21  
22 365 16. Koscielny A, Kalff JC. T-helper cell type 1 memory cells and  
23 366 postoperative ileus in the entire gut. *Curr Opin Gastroenterol*  
24 367 2011;27(6):509-14. doi: 10.1097/MOG.0b013e32834bb7d7  
25  
26 368 17. Mikkelsen HB, Thuneberg L. Op/op mice defective in production of  
27 369 functional colony-stimulating factor-1 lack macrophages in  
28 370 muscularis externa of the small intestine. *Cell Tissue Res*  
29 371 1999;295(3):485-93. doi: 10.1007/s004410051254  
30  
31 372 18. Ng SS, Leung WW, Mak TW, et al. Electroacupuncture reduces duration  
32 373 of postoperative ileus after laparoscopic surgery for colorectal  
33 374 cancer. *Gastroenterology* 2013;144(2):307-13 e1. doi:  
34 375 10.1053/j.gastro.2012.10.050  
35  
36 376 19. You XM, Mo XS, Ma L, et al. Randomized Clinical Trial Comparing  
37 377 Efficacy of Simo Decoction and Acupuncture or Chewing Gum Alone  
38 378 on Postoperative Ileus in Patients With Hepatocellular Carcinoma  
39 379 After Hepatectomy. *Medicine (Baltimore)* 2015;94(45):e1968. doi:  
40 380 10.1097/MD.0000000000001968  
41  
42 381 20. Song JG, Li HH, Cao YF, et al. Electroacupuncture improves survival  
43 382 in rats with lethal endotoxemia via the autonomic nervous system.  
44 383 *Anesthesiology* 2012;116(2):406-14. doi:  
45 384 10.1097/ALN.0b013e3182426ebd  
46  
47 385 21. Zhang J, Yong Y, Li X, et al. Vagal modulation of high mobility  
48 386 group box-1 protein mediates electroacupuncture-induced  
49 387 cardioprotection in ischemia-reperfusion injury. *Sci Rep*  
50 388 2015;5:15503. doi: 10.1038/srep15503  
51  
52 389 22. Balogun JA, Biasci S, Han L. The effects of acupuncture,  
53 390 electroneedling and transcutaneous electrical stimulation

- 1  
2  
3 391 therapies on peripheral haemodynamic functioning. *Disabil Rehabil* 1998;20(2):41-8. doi: 10.3109/09638289809166052
- 4 392
- 5 393 23. Jiang Y, Wang H, Liu Z, et al. Manipulation of and sustained effects
- 6 394 on the human brain induced by different modalities of acupuncture:
- 7 395 an fMRI study. *PLoS One* 2013;8(6):e66815. doi:
- 8 396 10.1371/journal.pone.0066815
- 9 397 24. Dindo D, Demartines N, Clavien PA. Classification of surgical
- 10 398 complications: a new proposal with evaluation in a cohort of 6336
- 11 399 patients and results of a survey. *Ann Surg* 2004;240(2):205-13.
- 12 400 doi: 10.1097/01.sla.0000133083.54934.ae
- 13 401 25. Rakel B, Cooper N, Adams HJ, et al. A new transient sham TENS
- 14 402 device allows for investigator blinding while delivering a true
- 15 403 placebo treatment. *J Pain* 2010;11(3):230-8. doi:
- 16 404 10.1016/j.jpain.2009.07.007
- 17 405 26. Huang L, Pan Y, Chen S, et al. Prevention of propofol injection-
- 18 406 related pain using pretreatment transcutaneous electrical
- 19 407 acupoint stimulation. *Turk J Med Sci* 2017;47(4):1267-76. doi:
- 20 408 10.3906/sag-1611-35
- 21 409 27. Zhang Q, Gao Z, Wang H, et al. The effect of pre-treatment with
- 22 410 transcutaneous electrical acupoint stimulation on the quality of
- 23 411 recovery after ambulatory breast surgery: a prospective,
- 24 412 randomised controlled trial. *Anaesthesia* 2014;69(8):832-9. doi:
- 25 413 10.1111/anae.12639
- 26 414 28. Zheng LH, Sun H, Wang GN, et al. Effect of transcutaneous electrical
- 27 415 acupoint stimulation on nausea and vomiting induced by patient
- 28 416 controlled intravenous analgesia with tramadol. *Chin J Integr*
- 29 417 *Med* 2008;14(1):61-4. doi: 10.1007/s11655-007-9006
- 30 418 29. Stakenborg N, Labeeuw E, Gomez-Pinilla PJ, et al. Preoperative
- 31 419 administration of the 5-HT4 receptor agonist prucalopride
- 32 420 reduces intestinal inflammation and shortens postoperative ileus
- 33 421 via cholinergic enteric neurons. *Gut* 2019;68(8):1406-16. doi:
- 34 422 10.1136/gutjnl-2018-317263
- 35 423 30. Vather R, Trivedi S, Bissett I. Defining postoperative ileus:
- 36 424 results of a systematic review and global survey. *J Gastrointest*
- 37 425 *Surg* 2013;17(5):962-72. doi: 10.1007/s11605-013-2148-y
- 38 426 31. Wu Z, Boersema GS, Dereci A, et al. Clinical endpoint, early
- 39 427 detection, and differential diagnosis of postoperative ileus: a
- 40 428 systematic review of the literature. *Eur Surg Res* 2015;54(3-
- 41 429 4):127-38. doi: 10.1159/000369529
- 42 430 32. Deng G, Wong WD, Guillem J, et al. A phase II, randomized,
- 43 431 controlled trial of acupuncture for reduction of Postcolectomy

- 1  
2  
3 432 Ileus. *Annals of surgical oncology* 2013;20(4):1164 - 69. doi:  
4 433 10.1245/s10434-012-2759-7
- 5  
6 434 33. van Bree SH, Bemelman WA, Hollmann MW, et al. Identification of  
7 435 clinical outcome measures for recovery of gastrointestinal  
8 436 motility in postoperative ileus. *Ann Surg* 2014;259(4):708-14.  
9 437 doi: 10.1097/SLA.0b013e318293ee55
- 10  
11 438 34. Maffezzini M, Campodonico F, Canepa G, et al. Current perioperative  
12 439 management of radical cystectomy with intestinal urinary  
13 440 reconstruction for muscle-invasive bladder cancer and reduction  
14 441 of the incidence of postoperative ileus. *Surg Oncol*  
15 442 2008;17(1):41-8. doi: 10.1016/j.suronc.2007.09.003
- 16  
17 443 35. Bungard TJ, Kale-Pradhan PB. Prokinetic agents for the treatment  
18 444 of postoperative ileus in adults: a review of the literature.  
19 445 *Pharmacotherapy* 1999;19(4):416-23. doi:  
20 446 10.1592/phco.19.6.416.31040
- 21  
22 447 36. Chae HD, Kwak MA, Kim IH. Effect of Acupuncture on Reducing Duration  
23 448 of Postoperative Ileus After Gastrectomy in Patients with Gastric  
24 449 Cancer: a Pilot Study Using Sitz Marker. *Journal of alternative*  
25 450 *and complementary medicine (new york, NY)* 2016;22(6):465 - 72.  
26 451 doi: 10.1089/acm.2015.0161
- 27  
28 452 37. Vilz TO, Pantelis D, Lingohr P, et al. SmartPill® as an objective  
29 453 parameter for determination of severity and duration of  
30 454 postoperative ileus: study protocol of a prospective, two-arm,  
31 455 open-label trial (the PIDuSA study). *Bmj Open* 2016;6(7):e011014.
- 32  
33  
34  
35  
36  
37  
38  
39  
40  
41  
42  
43  
44  
45  
46  
47  
48  
49  
50  
51  
52  
53  
54  
55  
56  
57  
58  
59  
60

## 458 **Figure Legend**

459 Figure 1. Flow chart of the study protocol

460 Figure 2. Acupoints selected in this trial (a) Hegu (IL-4) and Neiguan (P-6); (b) Zusanli (ST-  
461 36) and Shangjuxu (ST-37); (c) Han's acupoint nerve stimulator



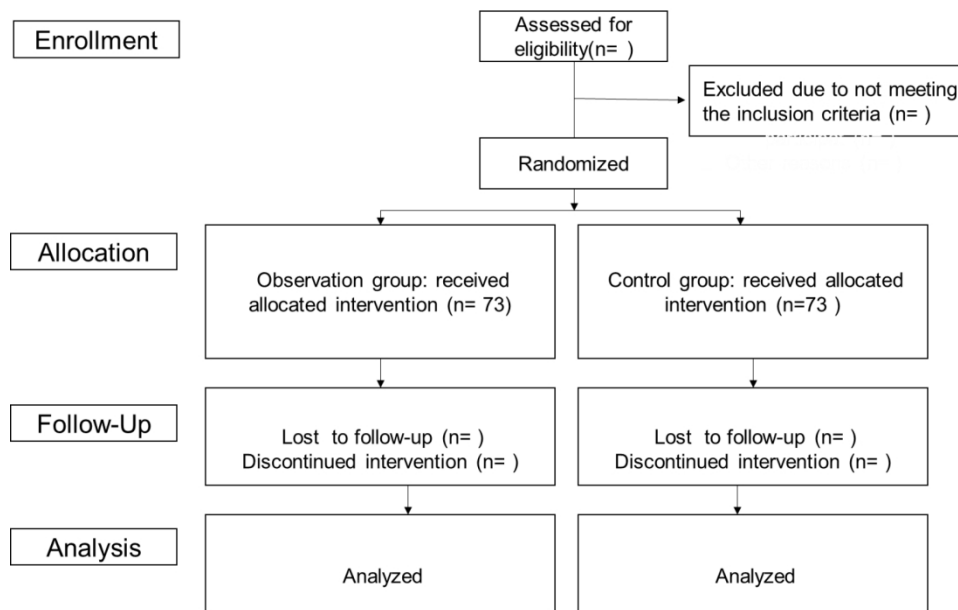

Figure 1. Flow chart of the study

177x109mm (300 x 300 DPI)



Figure 2. Acupoints selected in this trial. (a) shows Hegu (LI-4), Neiguan (P-6). (b) shows Zusanli (ST-36), Shangjuxu (ST-37). (c) Han's acupoint nerve stimulator.

103x87mm (300 x 300 DPI)



SPIRIT 2013 Checklist for the ReTrain pilot RCT: Recommended items to address in a clinical trial protocol and related documents\*

| Section/item                      | Item No | Description                                                                                                                                                                                                                                                                              | Addressed on page number |
|-----------------------------------|---------|------------------------------------------------------------------------------------------------------------------------------------------------------------------------------------------------------------------------------------------------------------------------------------------|--------------------------|
| <b>Administrative information</b> |         |                                                                                                                                                                                                                                                                                          |                          |
| Title                             | 1       | Descriptive title identifying the study design, population, interventions, and, if applicable, trial acronym                                                                                                                                                                             | _____ 1 _____            |
| Trial registration                | 2a      | Trial identifier and registry name. If not yet registered, name of intended registry                                                                                                                                                                                                     | _____ 2 _____            |
|                                   | 2b      | All items from the World Health Organization Trial Registration Data Set                                                                                                                                                                                                                 | _____ 2 _____            |
| Protocol version                  | 3       | Date and version identifier                                                                                                                                                                                                                                                              | _____ 2 _____            |
| Funding                           | 4       | Sources and types of financial, material, and other support                                                                                                                                                                                                                              | _____ 11 _____           |
| Roles and responsibilities        | 5a      | Names, affiliations, and roles of protocol contributors                                                                                                                                                                                                                                  | _____ 1&11 _____         |
|                                   | 5b      | Name and contact information for the trial sponsor                                                                                                                                                                                                                                       | _____ 11 _____           |
|                                   | 5c      | Role of study sponsor and funders, if any, in study design; collection, management, analysis, and interpretation of data; writing of the report; and the decision to submit the report for publication, including whether they will have ultimate authority over any of these activities | _____ 11 _____           |
|                                   | 5d      | Composition, roles, and responsibilities of the coordinating centre, steering committee, endpoint adjudication committee, data management team, and other individuals or groups overseeing the trial, if applicable (see Item 21a for data monitoring committee)                         | _____ 9 _____            |

|    |                                                           |     |                                                                                                               |               |
|----|-----------------------------------------------------------|-----|---------------------------------------------------------------------------------------------------------------|---------------|
| 1  | <b>Introduction</b>                                       |     |                                                                                                               |               |
| 2  |                                                           |     |                                                                                                               |               |
| 3  | Background and                                            | 6a  | Description of research question and justification for undertaking the trial, including summary of relevant   | _____4&5_____ |
| 4  | rationale                                                 |     | studies (published and unpublished) examining benefits and harms for each intervention                        |               |
| 5  |                                                           |     |                                                                                                               |               |
| 6  |                                                           | 6b  | Explanation for choice of comparators                                                                         | _____         |
| 7  |                                                           |     |                                                                                                               |               |
| 8  | Objectives                                                | 7   | Specific objectives or hypotheses                                                                             | _____5_____   |
| 9  |                                                           |     |                                                                                                               |               |
| 10 | Trial design                                              | 8   | Description of trial design including type of trial (eg, parallel group, crossover, factorial, single group), | _____5_____   |
| 11 |                                                           |     | allocation ratio, and framework (eg, superiority, equivalence, noninferiority, exploratory)                   |               |
| 12 |                                                           |     |                                                                                                               |               |
| 13 |                                                           |     |                                                                                                               |               |
| 14 | <b>Methods: Participants, interventions, and outcomes</b> |     |                                                                                                               |               |
| 15 |                                                           |     |                                                                                                               |               |
| 16 | Study setting                                             | 9   | Description of study settings (eg, community clinic, academic hospital) and list of countries where data will | _____6_____   |
| 17 |                                                           |     | be collected. Reference to where list of study sites can be obtained                                          |               |
| 18 |                                                           |     |                                                                                                               |               |
| 19 | Eligibility criteria                                      | 10  | Inclusion and exclusion criteria for participants. If applicable, eligibility criteria for study centres and  | _____6_____   |
| 20 |                                                           |     | individuals who will perform the interventions (eg, surgeons, psychotherapists)                               |               |
| 21 |                                                           |     |                                                                                                               |               |
| 22 | Interventions                                             | 11a | Interventions for each group with sufficient detail to allow replication, including how and when they will be | _____8&9_____ |
| 23 |                                                           |     | administered                                                                                                  |               |
| 24 |                                                           |     |                                                                                                               |               |
| 25 |                                                           | 11b | Criteria for discontinuing or modifying allocated interventions for a given trial participant (eg, drug dose  | _____         |
| 26 |                                                           |     | change in response to harms, participant request, or improving/worsening disease)                             |               |
| 27 |                                                           |     |                                                                                                               |               |
| 28 |                                                           | 11c | Strategies to improve adherence to intervention protocols, and any procedures for monitoring adherence        | _____         |
| 29 |                                                           |     | (eg, drug tablet return, laboratory tests)                                                                    |               |
| 30 |                                                           |     |                                                                                                               |               |
| 31 |                                                           | 11d | Relevant concomitant care and interventions that are permitted or prohibited during the trial                 | _____         |
| 32 |                                                           |     |                                                                                                               |               |
| 33 | Outcomes                                                  | 12  | Primary, secondary, and other outcomes, including the specific measurement variable (eg, systolic blood       | _____7_____   |
| 34 |                                                           |     | pressure), analysis metric (eg, change from baseline, final value, time to event), method of aggregation (eg, |               |
| 35 |                                                           |     | median, proportion), and time point for each outcome. Explanation of the clinical relevance of chosen         |               |
| 36 |                                                           |     | efficacy and harm outcomes is strongly recommended                                                            |               |
| 37 |                                                           |     |                                                                                                               |               |
| 38 | Participant timeline                                      | 13  | Time schedule of enrolment, interventions (including any run-ins and washouts), assessments, and visits for   | _____7_____   |
| 39 |                                                           |     | participants. A schematic diagram is highly recommended (see Figure)                                          |               |
| 40 |                                                           |     |                                                                                                               |               |
| 41 |                                                           |     |                                                                                                               |               |
| 42 |                                                           |     |                                                                                                               |               |
| 43 |                                                           |     |                                                                                                               |               |
| 44 |                                                           |     |                                                                                                               |               |
| 45 |                                                           |     |                                                                                                               |               |
| 46 |                                                           |     |                                                                                                               |               |

|   |             |    |                                                                                                                                                                                       |             |
|---|-------------|----|---------------------------------------------------------------------------------------------------------------------------------------------------------------------------------------|-------------|
| 1 | Sample size | 14 | Estimated number of participants needed to achieve study objectives and how it was determined, including clinical and statistical assumptions supporting any sample size calculations | _____8_____ |
| 2 |             |    |                                                                                                                                                                                       |             |
| 3 |             |    |                                                                                                                                                                                       |             |
| 4 | Recruitment | 15 | Strategies for achieving adequate participant enrolment to reach target sample size                                                                                                   | _____8_____ |
| 5 |             |    |                                                                                                                                                                                       |             |

### 6 **Methods: Assignment of interventions (for controlled trials)**

#### 7 Allocation:

|    |                                  |     |                                                                                                                                                                                                                                                                                                                                                          |             |
|----|----------------------------------|-----|----------------------------------------------------------------------------------------------------------------------------------------------------------------------------------------------------------------------------------------------------------------------------------------------------------------------------------------------------------|-------------|
| 8  |                                  |     |                                                                                                                                                                                                                                                                                                                                                          |             |
| 9  |                                  |     |                                                                                                                                                                                                                                                                                                                                                          |             |
| 10 | Sequence generation              | 16a | Method of generating the allocation sequence (eg, computer-generated random numbers), and list of any factors for stratification. To reduce predictability of a random sequence, details of any planned restriction (eg, blocking) should be provided in a separate document that is unavailable to those who enrol participants or assign interventions | _____7_____ |
| 11 |                                  |     |                                                                                                                                                                                                                                                                                                                                                          |             |
| 12 |                                  |     |                                                                                                                                                                                                                                                                                                                                                          |             |
| 13 |                                  |     |                                                                                                                                                                                                                                                                                                                                                          |             |
| 14 |                                  |     |                                                                                                                                                                                                                                                                                                                                                          |             |
| 15 |                                  |     |                                                                                                                                                                                                                                                                                                                                                          |             |
| 16 | Allocation concealment mechanism | 16b | Mechanism of implementing the allocation sequence (eg, central telephone; sequentially numbered, opaque, sealed envelopes), describing any steps to conceal the sequence until interventions are assigned                                                                                                                                                | _____7_____ |
| 17 |                                  |     |                                                                                                                                                                                                                                                                                                                                                          |             |
| 18 |                                  |     |                                                                                                                                                                                                                                                                                                                                                          |             |
| 19 |                                  |     |                                                                                                                                                                                                                                                                                                                                                          |             |
| 20 | Implementation                   | 16c | Who will generate the allocation sequence, who will enrol participants, and who will assign participants to interventions                                                                                                                                                                                                                                | _____7_____ |
| 21 |                                  |     |                                                                                                                                                                                                                                                                                                                                                          |             |
| 22 |                                  |     |                                                                                                                                                                                                                                                                                                                                                          |             |
| 23 |                                  |     |                                                                                                                                                                                                                                                                                                                                                          |             |
| 24 | Blinding (masking)               | 17a | Who will be blinded after assignment to interventions (eg, trial participants, care providers, outcome assessors, data analysts), and how                                                                                                                                                                                                                | _____7_____ |
| 25 |                                  |     |                                                                                                                                                                                                                                                                                                                                                          |             |
| 26 |                                  |     |                                                                                                                                                                                                                                                                                                                                                          |             |
| 27 |                                  | 17b | If blinded, circumstances under which unblinding is permissible, and procedure for revealing a participant's allocated intervention during the trial                                                                                                                                                                                                     | _____7_____ |
| 28 |                                  |     |                                                                                                                                                                                                                                                                                                                                                          |             |
| 29 |                                  |     |                                                                                                                                                                                                                                                                                                                                                          |             |
| 30 |                                  |     |                                                                                                                                                                                                                                                                                                                                                          |             |

### 31 **Methods: Data collection, management, and analysis**

|    |                         |     |                                                                                                                                                                                                                                                                                                                                                                                                              |             |
|----|-------------------------|-----|--------------------------------------------------------------------------------------------------------------------------------------------------------------------------------------------------------------------------------------------------------------------------------------------------------------------------------------------------------------------------------------------------------------|-------------|
| 32 |                         |     |                                                                                                                                                                                                                                                                                                                                                                                                              |             |
| 33 | Data collection methods | 18a | Plans for assessment and collection of outcome, baseline, and other trial data, including any related processes to promote data quality (eg, duplicate measurements, training of assessors) and a description of study instruments (eg, questionnaires, laboratory tests) along with their reliability and validity, if known. Reference to where data collection forms can be found, if not in the protocol | _____9_____ |
| 34 |                         |     |                                                                                                                                                                                                                                                                                                                                                                                                              |             |
| 35 |                         |     |                                                                                                                                                                                                                                                                                                                                                                                                              |             |
| 36 |                         |     |                                                                                                                                                                                                                                                                                                                                                                                                              |             |
| 37 |                         |     |                                                                                                                                                                                                                                                                                                                                                                                                              |             |
| 38 |                         |     |                                                                                                                                                                                                                                                                                                                                                                                                              |             |
| 39 |                         | 18b | Plans to promote participant retention and complete follow-up, including list of any outcome data to be collected for participants who discontinue or deviate from intervention protocols                                                                                                                                                                                                                    | _____9_____ |
| 40 |                         |     |                                                                                                                                                                                                                                                                                                                                                                                                              |             |
| 41 |                         |     |                                                                                                                                                                                                                                                                                                                                                                                                              |             |
| 42 |                         |     |                                                                                                                                                                                                                                                                                                                                                                                                              |             |

|    |                                 |     |                                                                                                                                                                                                                                                                                                                                       |    |
|----|---------------------------------|-----|---------------------------------------------------------------------------------------------------------------------------------------------------------------------------------------------------------------------------------------------------------------------------------------------------------------------------------------|----|
| 1  | Data management                 | 19  | Plans for data entry, coding, security, and storage, including any related processes to promote data quality (eg, double data entry; range checks for data values). Reference to where details of data management procedures can be found, if not in the protocol                                                                     | 9  |
| 2  |                                 |     |                                                                                                                                                                                                                                                                                                                                       |    |
| 3  |                                 |     |                                                                                                                                                                                                                                                                                                                                       |    |
| 4  |                                 |     |                                                                                                                                                                                                                                                                                                                                       |    |
| 5  | Statistical methods             | 20a | Statistical methods for analysing primary and secondary outcomes. Reference to where other details of the statistical analysis plan can be found, if not in the protocol                                                                                                                                                              | 8  |
| 6  |                                 |     |                                                                                                                                                                                                                                                                                                                                       |    |
| 7  |                                 |     |                                                                                                                                                                                                                                                                                                                                       |    |
| 8  |                                 | 20b | Methods for any additional analyses (eg, subgroup and adjusted analyses)                                                                                                                                                                                                                                                              | 8  |
| 9  |                                 |     |                                                                                                                                                                                                                                                                                                                                       |    |
| 10 |                                 | 20c | Definition of analysis population relating to protocol non-adherence (eg, as randomised analysis), and any statistical methods to handle missing data (eg, multiple imputation)                                                                                                                                                       | 8  |
| 11 |                                 |     |                                                                                                                                                                                                                                                                                                                                       |    |
| 12 |                                 |     |                                                                                                                                                                                                                                                                                                                                       |    |
| 13 |                                 |     |                                                                                                                                                                                                                                                                                                                                       |    |
| 14 | <b>Methods: Monitoring</b>      |     |                                                                                                                                                                                                                                                                                                                                       |    |
| 15 |                                 |     |                                                                                                                                                                                                                                                                                                                                       |    |
| 16 | Data monitoring                 | 21a | Composition of data monitoring committee (DMC); summary of its role and reporting structure; statement of whether it is independent from the sponsor and competing interests; and reference to where further details about its charter can be found, if not in the protocol. Alternatively, an explanation of why a DMC is not needed | 9  |
| 17 |                                 |     |                                                                                                                                                                                                                                                                                                                                       |    |
| 18 |                                 |     |                                                                                                                                                                                                                                                                                                                                       |    |
| 19 |                                 |     |                                                                                                                                                                                                                                                                                                                                       |    |
| 20 |                                 |     |                                                                                                                                                                                                                                                                                                                                       |    |
| 21 |                                 |     |                                                                                                                                                                                                                                                                                                                                       |    |
| 22 |                                 | 21b | Description of any interim analyses and stopping guidelines, including who will have access to these interim results and make the final decision to terminate the trial                                                                                                                                                               | 9  |
| 23 |                                 |     |                                                                                                                                                                                                                                                                                                                                       |    |
| 24 |                                 |     |                                                                                                                                                                                                                                                                                                                                       |    |
| 25 | Harms                           | 22  | Plans for collecting, assessing, reporting, and managing solicited and spontaneously reported adverse events and other unintended effects of trial interventions or trial conduct                                                                                                                                                     | 9  |
| 26 |                                 |     |                                                                                                                                                                                                                                                                                                                                       |    |
| 27 |                                 |     |                                                                                                                                                                                                                                                                                                                                       |    |
| 28 | Auditing                        | 23  | Frequency and procedures for auditing trial conduct, if any, and whether the process will be independent from investigators and the sponsor                                                                                                                                                                                           | 10 |
| 29 |                                 |     |                                                                                                                                                                                                                                                                                                                                       |    |
| 30 |                                 |     |                                                                                                                                                                                                                                                                                                                                       |    |
| 31 |                                 |     |                                                                                                                                                                                                                                                                                                                                       |    |
| 32 | <b>Ethics and dissemination</b> |     |                                                                                                                                                                                                                                                                                                                                       |    |
| 33 |                                 |     |                                                                                                                                                                                                                                                                                                                                       |    |
| 34 | Research ethics approval        | 24  | Plans for seeking research ethics committee/institutional review board (REC/IRB) approval                                                                                                                                                                                                                                             | 2  |
| 35 |                                 |     |                                                                                                                                                                                                                                                                                                                                       |    |
| 36 |                                 |     |                                                                                                                                                                                                                                                                                                                                       |    |
| 37 | Protocol amendments             | 25  | Plans for communicating important protocol modifications (eg, changes to eligibility criteria, outcomes, analyses) to relevant parties (eg, investigators, REC/IRBs, trial participants, trial registries, journals, regulators)                                                                                                      | 10 |
| 38 |                                 |     |                                                                                                                                                                                                                                                                                                                                       |    |
| 39 |                                 |     |                                                                                                                                                                                                                                                                                                                                       |    |
| 40 |                                 |     |                                                                                                                                                                                                                                                                                                                                       |    |
| 41 |                                 |     |                                                                                                                                                                                                                                                                                                                                       |    |
| 42 |                                 |     |                                                                                                                                                                                                                                                                                                                                       |    |
| 43 |                                 |     |                                                                                                                                                                                                                                                                                                                                       |    |
| 44 |                                 |     |                                                                                                                                                                                                                                                                                                                                       |    |
| 45 |                                 |     |                                                                                                                                                                                                                                                                                                                                       |    |
| 46 |                                 |     |                                                                                                                                                                                                                                                                                                                                       |    |

|    |                               |     |                                                                                                                                                                                                                                                                                     |              |
|----|-------------------------------|-----|-------------------------------------------------------------------------------------------------------------------------------------------------------------------------------------------------------------------------------------------------------------------------------------|--------------|
| 1  | Consent or assent             | 26a | Who will obtain informed consent or assent from potential trial participants or authorised surrogates, and how (see Item 32)                                                                                                                                                        | _____6_____  |
| 2  |                               |     |                                                                                                                                                                                                                                                                                     |              |
| 3  |                               |     |                                                                                                                                                                                                                                                                                     |              |
| 4  |                               | 26b | Additional consent provisions for collection and use of participant data and biological specimens in ancillary studies, if applicable                                                                                                                                               | _____6_____  |
| 5  |                               |     |                                                                                                                                                                                                                                                                                     |              |
| 6  |                               |     |                                                                                                                                                                                                                                                                                     |              |
| 7  | Confidentiality               | 27  | How personal information about potential and enrolled participants will be collected, shared, and maintained in order to protect confidentiality before, during, and after the trial                                                                                                | _____9_____  |
| 8  |                               |     |                                                                                                                                                                                                                                                                                     |              |
| 9  |                               |     |                                                                                                                                                                                                                                                                                     |              |
| 10 | Declaration of interests      | 28  | Financial and other competing interests for principal investigators for the overall trial and each study site                                                                                                                                                                       | _____11_____ |
| 11 |                               |     |                                                                                                                                                                                                                                                                                     |              |
| 12 |                               |     |                                                                                                                                                                                                                                                                                     |              |
| 13 | Access to data                | 29  | Statement of who will have access to the final trial dataset, and disclosure of contractual agreements that limit such access for investigators                                                                                                                                     | _____9_____  |
| 14 |                               |     |                                                                                                                                                                                                                                                                                     |              |
| 15 |                               |     |                                                                                                                                                                                                                                                                                     |              |
| 16 | Ancillary and post-trial care | 30  | Provisions, if any, for ancillary and post-trial care, and for compensation to those who suffer harm from trial participation                                                                                                                                                       | _____9_____  |
| 17 |                               |     |                                                                                                                                                                                                                                                                                     |              |
| 18 |                               |     |                                                                                                                                                                                                                                                                                     |              |
| 19 |                               |     |                                                                                                                                                                                                                                                                                     |              |
| 20 | Dissemination policy          | 31a | Plans for investigators and sponsor to communicate trial results to participants, healthcare professionals, the public, and other relevant groups (eg, via publication, reporting in results databases, or other data sharing arrangements), including any publication restrictions | _____2_____  |
| 21 |                               |     |                                                                                                                                                                                                                                                                                     |              |
| 22 |                               |     |                                                                                                                                                                                                                                                                                     |              |
| 23 |                               |     |                                                                                                                                                                                                                                                                                     |              |
| 24 |                               | 31b | Authorship eligibility guidelines and any intended use of professional writers                                                                                                                                                                                                      | _____2_____  |
| 25 |                               |     |                                                                                                                                                                                                                                                                                     |              |
| 26 |                               | 31c | Plans, if any, for granting public access to the full protocol, participant-level dataset, and statistical code                                                                                                                                                                     | _____2_____  |
| 27 |                               |     |                                                                                                                                                                                                                                                                                     |              |
| 28 |                               |     |                                                                                                                                                                                                                                                                                     |              |
| 29 | <b>Appendices</b>             |     |                                                                                                                                                                                                                                                                                     |              |
| 30 |                               |     |                                                                                                                                                                                                                                                                                     |              |
| 31 | Informed consent materials    | 32  | Model consent form and other related documentation given to participants and authorised surrogates                                                                                                                                                                                  | _____NA_____ |
| 32 |                               |     |                                                                                                                                                                                                                                                                                     |              |
| 33 |                               |     |                                                                                                                                                                                                                                                                                     |              |
| 34 | Biological specimens          | 33  | Plans for collection, laboratory evaluation, and storage of biological specimens for genetic or molecular analysis in the current trial and for future use in ancillary studies, if applicable                                                                                      | _____NA_____ |
| 35 |                               |     |                                                                                                                                                                                                                                                                                     |              |
| 36 |                               |     |                                                                                                                                                                                                                                                                                     |              |

\*It is strongly recommended that this checklist be read in conjunction with the SPIRIT 2013 Explanation & Elaboration for important clarification on the items. Amendments to the protocol should be tracked and dated. The SPIRIT checklist is copyrighted by the SPIRIT Group under the Creative Commons [“Attribution-NonCommercial-NoDerivs 3.0 Unported”](https://creativecommons.org/licenses/by-nc-nd/3.0/) license.

# BMJ Open

## Pretreatment with transcutaneous electrical acupoint stimulation to prevent postoperative ileus in patients undergoing laparoscopic colon surgery: study protocol for a randomized controlled trial

|                                 |                                                                                                                                                                                                                                                                                                                                                                                                                                                                                                                                                                                                                                                                                                                                                                                                                                                                                                                                                                                                                                                                                                                                                                                                                                                                                                                                                                                                                                                                                                                                                                                                                          |
|---------------------------------|--------------------------------------------------------------------------------------------------------------------------------------------------------------------------------------------------------------------------------------------------------------------------------------------------------------------------------------------------------------------------------------------------------------------------------------------------------------------------------------------------------------------------------------------------------------------------------------------------------------------------------------------------------------------------------------------------------------------------------------------------------------------------------------------------------------------------------------------------------------------------------------------------------------------------------------------------------------------------------------------------------------------------------------------------------------------------------------------------------------------------------------------------------------------------------------------------------------------------------------------------------------------------------------------------------------------------------------------------------------------------------------------------------------------------------------------------------------------------------------------------------------------------------------------------------------------------------------------------------------------------|
| Journal:                        | <i>BMJ Open</i>                                                                                                                                                                                                                                                                                                                                                                                                                                                                                                                                                                                                                                                                                                                                                                                                                                                                                                                                                                                                                                                                                                                                                                                                                                                                                                                                                                                                                                                                                                                                                                                                          |
| Manuscript ID                   | bmjopen-2019-030694.R3                                                                                                                                                                                                                                                                                                                                                                                                                                                                                                                                                                                                                                                                                                                                                                                                                                                                                                                                                                                                                                                                                                                                                                                                                                                                                                                                                                                                                                                                                                                                                                                                   |
| Article Type:                   | Protocol                                                                                                                                                                                                                                                                                                                                                                                                                                                                                                                                                                                                                                                                                                                                                                                                                                                                                                                                                                                                                                                                                                                                                                                                                                                                                                                                                                                                                                                                                                                                                                                                                 |
| Date Submitted by the Author:   | 09-May-2020                                                                                                                                                                                                                                                                                                                                                                                                                                                                                                                                                                                                                                                                                                                                                                                                                                                                                                                                                                                                                                                                                                                                                                                                                                                                                                                                                                                                                                                                                                                                                                                                              |
| Complete List of Authors:       | <p>Wang, Jian; Shuguang Hospital Affiliated to Shanghai University of Traditional Chinese Medicine<br/>           Li, Dongli; Wenzhou Medical University, the sixth Affiliated Hospital, Anesthesiology<br/>           Tang, Wei; Shuguang Hospital Affiliated to Shanghai University of Traditional Chinese Medicine, Anesthesiology<br/>           Guo, Jun; Shuguang Hospital Affiliated to Shanghai University of Traditional Chinese Medicine, Anesthesiology<br/>           Chen, Wenting; Shuguang Hospital Affiliated to Shanghai University of Traditional Chinese Medicine, Anesthesiology<br/>           Yong, Yue; Shuguang Hospital Affiliated to Shanghai University of Traditional Chinese Medicine, Anesthesiology<br/>           Song, Wei; Shuguang Hospital Affiliated to Shanghai University of Traditional Chinese Medicine<br/>           Yu, Guijie; Shuguang Hospital Affiliated to Shanghai University of Traditional Chinese Medicine, Anesthesiology<br/>           Feng, Rui; Shuguang Hospital Affiliated to Shanghai University of Traditional Chinese Medicine, Anesthesiology<br/>           Yuan, Lan; Shuguang Hospital Affiliated to Shanghai University of Traditional Chinese Medicine, Anesthesiology<br/>           Fu, Guoqiang; Shuguang Hospital Affiliated to Shanghai University of Traditional Chinese Medicine, Anesthesiology<br/>           Song, Jiangang; Shuguang Hospital Affiliated to Shanghai University of Traditional Chinese Medicine, Anesthesiology<br/>           Fan, Lihua; Wenzhou Medical University, the sixth Affiliated Hospital, Anesthesiology</p> |
| <b>Primary Subject Heading</b>: | Complementary medicine                                                                                                                                                                                                                                                                                                                                                                                                                                                                                                                                                                                                                                                                                                                                                                                                                                                                                                                                                                                                                                                                                                                                                                                                                                                                                                                                                                                                                                                                                                                                                                                                   |
| Secondary Subject Heading:      | Anaesthesia, Gastroenterology and hepatology, Surgery                                                                                                                                                                                                                                                                                                                                                                                                                                                                                                                                                                                                                                                                                                                                                                                                                                                                                                                                                                                                                                                                                                                                                                                                                                                                                                                                                                                                                                                                                                                                                                    |
| Keywords:                       | Transcutaneous electrical acupoint stimulation (TEAS), postoperative ileus (POI), Pretreatment                                                                                                                                                                                                                                                                                                                                                                                                                                                                                                                                                                                                                                                                                                                                                                                                                                                                                                                                                                                                                                                                                                                                                                                                                                                                                                                                                                                                                                                                                                                           |
|                                 |                                                                                                                                                                                                                                                                                                                                                                                                                                                                                                                                                                                                                                                                                                                                                                                                                                                                                                                                                                                                                                                                                                                                                                                                                                                                                                                                                                                                                                                                                                                                                                                                                          |



1  
2  
3  
4  
5  
6  
7  
8  
9  
10  
11  
12  
13  
14  
15  
16  
17  
18  
19  
20  
21  
22  
23  
24  
25  
26  
27  
28  
29  
30  
31  
32  
33  
34  
35  
36  
37  
38  
39  
40  
41  
42  
43  
44  
45  
46  
47  
48  
49  
50  
51  
52  
53  
54  
55  
56  
57  
58  
59  
60





I, the Submitting Author has the right to grant and does grant on behalf of all authors of the Work (as defined in the below author licence), an exclusive licence and/or a non-exclusive licence for contributions from authors who are: i) UK Crown employees; ii) where BMJ has agreed a CC-BY licence shall apply, and/or iii) in accordance with the terms applicable for US Federal Government officers or employees acting as part of their official duties; on a worldwide, perpetual, irrevocable, royalty-free basis to BMJ Publishing Group Ltd ("BMJ") its licensees and where the relevant Journal is co-owned by BMJ to the co-owners of the Journal, to publish the Work in this journal and any other BMJ products and to exploit all rights, as set out in our [licence](#).

The Submitting Author accepts and understands that any supply made under these terms is made by BMJ to the Submitting Author unless you are acting as an employee on behalf of your employer or a postgraduate student of an affiliated institution which is paying any applicable article publishing charge ("APC") for Open Access articles. Where the Submitting Author wishes to make the Work available on an Open Access basis (and intends to pay the relevant APC), the terms of reuse of such Open Access shall be governed by a Creative Commons licence – details of these licences and which [Creative Commons](#) licence will apply to this Work are set out in our licence referred to above.

Other than as permitted in any relevant BMJ Author's Self Archiving Policies, I confirm this Work has not been accepted for publication elsewhere, is not being considered for publication elsewhere and does not duplicate material already published. I confirm all authors consent to publication of this Work and authorise the granting of this licence.

1  
2  
3  
4 1 **Pretreatment with transcutaneous electrical acupoint stimulation to prevent**  
5  
6 2 **postoperative ileus in patients undergoing laparoscopic colon surgery: study protocol for**  
7  
8 3 **a randomized controlled trial**  
9  
10 4

11 5 Wang, Jian MD<sup>1,#</sup>; Li, Dongli MD<sup>2,#</sup>; Tang, Wei MD<sup>1</sup>; Guo, Jun MD<sup>1</sup>; Chen, Wenting MD<sup>1</sup>;  
12 6 Yong, Yue MD<sup>1</sup>; Song, Wei<sup>1</sup>; Yu, Guijie MD<sup>1</sup>; Feng, Rui MD<sup>1</sup>; Yuan, Lan MD<sup>1</sup>; Fu, Guoqiang  
13 7 MD<sup>1</sup>; Song, Jiangang MD<sup>1,\*</sup>; Fan, Lihua MD<sup>2,\*</sup>  
14  
15  
16  
17  
18  
19

20 9 <sup>1</sup>Department of Anesthesiology, Shuguang Hospital Affiliated to Shanghai University of  
21  
22 10 Traditional Chinese Medicine, Shanghai, China  
23

24 11 <sup>2</sup>Department of Anesthesiology, Wenzhou Medical University, the sixth Affiliated Hospital,  
25  
26 12 Lishui 323000, China  
27  
28  
29

30 14 #These authors contributed equally to this work.  
31  
32  
33

34 16 \*Corresponding Author: Li-hua Fan. Department of Anesthesiology, Wenzhou Medical  
35  
36 17 University, the sixth Affiliated Hospital, Lishui 323000, China; Email: fanlihua\_ls@126.com.  
37  
38 18 Jian-gang Song, Department of Anesthesiology, Shuguang Hospital Affiliated to Shanghai  
39  
40 19 University of Traditional Chinese Medicine, Shanghai 201203, China. email:  
41  
42 20 songjg1993@126.com  
43  
44 21

1  
2  
3  
4 22 **Abstract**

5 23 **Introduction:** Postoperative ileus (POI), a common complication after surgery, severely affects  
6  
7  
8 24 postoperative recovery. It is unclear whether pretreatment with transcutaneous electrical  
9  
10 25 acupoint stimulation (TEAS) can improve recovery from POI. This trial will evaluate the effects  
11  
12 26 of pretreatment with TEAS on POI.

13  
14 27 **Methods and analysis:** This will be a prospective, randomized, controlled trial. ASA I–III  
15  
16 28 level patients, aged 18–75 years and scheduled for laparoscopic colon surgery, will be included  
17  
18 29 in the study. It is planned that 146 subjects will be randomized to the TEAS and sham TEAS  
19  
20 30 (STEAS) groups. The groups will undergo two sessions of TEAS/STEAS daily for three days  
21  
22 31 before surgery, with a final TEAS/STEAS treatment 30 minutes before anesthesia. The primary  
23  
24 32 endpoint of the study will be time to first defecation. Secondary endpoints will include time to  
25  
26 33 first flatus, time to tolerance of oral diet, GI-2 (composite outcome of time to first defecation  
27  
28 34 and time to tolerance of oral diet), time to independent walking , length of hospital stay,  
29  
30 35 postoperative pain VAS score on the first three days after surgery, analgesic requirements,  
31  
32 36 complications, and plasma concentrations of IFN- $\beta$ , IFN- $\gamma$ , IL-6 and IL-1 $\beta$ . Multiple linear  
33  
34 37 regression will be used to identify independent predictors of outcome measures.

35  
36 38 **Ethics and dissemination:** This study has been approved by the Chinese Registered Clinical  
37  
38 39 Trial Ethics Review Committee (NO.ChiECRCT-20170084). The results of the trial will be  
39  
40 40 published in an international peer-reviewed journal.

41 41 **Trial registration:** This study has been registered with the Chinese Clinical Trial Registry (NO.  
42  
43 42 ChiCTR-INR-17013184).

44 43 **Trial status:** The study was in the recruitment phase at the time of manuscript submission.

45 44 **Abbreviations:** POI = postoperative ileus, TCM = traditional Chinese medicine, EA = electro-  
46  
47 45 acupuncture, TEAS = transcutaneous electrical acupoint stimulation, BIS = bispectral index,  
48  
49 46 PACU = post anesthesia care unit, ERAS= enhanced recovery after surgery.

50  
51 47 **Key words:** transcutaneous electrical acupoint stimulation (TEAS); postoperative ileus (POI);  
52  
53 48 pretreatment.  
54  
55  
56  
57  
58  
59  
60

1  
2  
3  
4 49 Strengths and limitations of the study  
5  
6 50

- 7 51 ➤ This study aims to evaluate whether pretreatment with transcutaneous electrical  
8 52 acupoint stimulation (TEAS) can prevent postoperative ileus (POI).  
9 53 ➤ TEAS is a safe, noninvasive and easily accepted adjunctive intervention.  
10 54 ➤ This study will provide deeper insights into the mechanism by which TEAS  
11 55 pretreatment reduces the inflammatory response.  
12 56 ➤ This is a single-center study, which is a potential limitation.  
13  
14  
15  
16  
17  
18  
19  
20  
21  
22  
23  
24  
25  
26  
27  
28  
29  
30  
31  
32  
33  
34  
35  
36  
37  
38  
39  
40  
41  
42  
43  
44  
45  
46  
47  
48  
49  
50  
51  
52  
53  
54  
55  
56  
57  
58  
59  
60

For peer review only

## 57 **Introduction**

58 Postoperative ileus (POI) is a transient dysfunction of gastrointestinal propulsion that often  
59 occurs after abdominal surgery and may also occur following surgery at other sites<sup>1</sup>. The main  
60 symptoms of POI include abdominal pain and distention, nausea, vomiting, difficult defecation  
61 and intolerance to solid food. POI is usually temporary, but if prolonged, may lead to surgical  
62 incision dehiscence, intestinal anastomotic fistula, abdominal cavity infection, intestinal  
63 ischemia, aspiration pneumonia and other serious complications<sup>2-4</sup>. A retrospective cohort study  
64 involving nearly 500 hospitals in the United States showed that POI is a key reason for  
65 prolonged hospitalization and increased medical costs for patients undergoing abdominal  
66 surgery<sup>1</sup>. The United States spends more than \$1.46 billion treating POI every year<sup>5</sup>. At present,  
67 the most common methods used to treat POI include: rational perioperative use of narcotic  
68 drugs and opioids, eating as soon as possible after surgery, avoidance of nasogastric tubes after  
69 the operation, early ambulation, postoperative epidural analgesia, restriction of fluid intake, the  
70 use of minimally invasive surgery (such as laparoscopic), drug therapy and the use of chewing  
71 gum. Despite the numerous treatment strategies, POI remains a difficult clinical challenge that  
72 compromises the rapid recovery of postoperative patients. It is, therefore, necessary to find  
73 more effective, convenient and economical treatment methods<sup>6-10</sup>.

74 The main mechanism underlying POI may be activation of macrophages in the external  
75 muscular layer during the surgical procedure<sup>11</sup>. Intestinal manipulation during surgery can  
76 activate macrophages in the outer muscle layer of the small intestine, leading to release of  
77 inflammatory factors (IL-6, IL-1 $\beta$ ) and the chemokine MIP-1 $\alpha$ , together with increased  
78 expression of the adhesion molecule ICAM-1 on endothelial cells and induction of neutrophils  
79 and monocytes in the circulation into the small intestine muscle layer. These cells, and activated  
80 macrophages, can release a large amount of inducible nitric oxide synthase (iNOS) and  
81 prostaglandin, which inhibit the movement and contraction of the gastrointestinal tract<sup>12,13</sup>.  
82 Transport of these inflammatory mediators in the blood stream causes activation of  
83 macrophages in the distal gastrointestinal tract, leading to postoperative ileus over the entire

1  
2  
3  
4 84 intestinal tract<sup>14</sup>. It has been confirmed by a large number of animal experiments that reducing  
5 85 the inflammatory response is an effective way to treat POI<sup>15-17</sup>.

6  
7 86 There is a long history in traditional Chinese medicine (TCM) of using acupuncture to treat  
8  
9 87 functional gastrointestinal diseases and, in recent years, there has been significant global  
10 88 interest in the beneficial effects of acupuncture on POI. The positive effect of  
11  
12 89 electroacupuncture (EA) on POI has been clearly demonstrated. Ng *et al.* used EA to treat POI  
13  
14 90 in patients undergoing laparoscopic colon surgery<sup>18</sup>. Defecation time and length of hospital stay  
15  
16 91 were significantly shortened in patients who received EA compared with those who did not  
17  
18 92 receive the treatment. In patients undergoing hepatic resection, You *et al.* found a significant  
19  
20 93 reduction in the incidence of POI in patients treated with a combination of acupuncture and  
21  
22 94 Chinese herbal medicine. The length of hospitalization was also significantly shortened in the  
23  
24 95 treated group ( $14.0 \pm 4.9$  d vs  $16.5 \pm 6.8$  d,  $P = 0.014$ )<sup>19</sup>.

25  
26  
27 96 In previous studies, we proved that pretreatment with acupuncture could reduce excessive  
28  
29 97 activation of the innate immune system and inhibit the inflammatory response. This effect may  
30  
31 98 be achieved by activation of the vagal nervous system<sup>20,21</sup>. Other studies have shown that  
32  
33 99 transcutaneous electrical acupoint stimulation (TEAS) and EA have similar effects in the  
34  
35 100 treatment of pain and alleviating the inflammatory response<sup>22,23</sup>.

36  
37  
38 101 Traditional Chinese medicine holds that the best treatment for disease is prevention. Based on  
39  
40 102 all of the above studies, we hypothesize that the use of TEAS as a preoperative treatment may  
41  
42 103 reduce the incidence of POI. There have, so far, not been any studies that address this question.  
43  
44 104 We have, therefore, designed a randomized, controlled trial to investigate whether pretreatment  
45  
46 105 with TEAS can reduce the incidence of POI in patients undergoing laparoscopic colon resection.  
47  
48 106 The study is also designed to verify that the anti-inflammatory effect is associated with the  
49  
50 107 immunomodulatory function of TEAS.

51  
52 108

## 53 54 109 **Methods and analysis**

### 55 56 110 ***Study objective***

1  
2  
3  
4 111 The primary objective is to assess the effect of TEAS on clinical recovery of bowel function  
5  
6 112 after laparoscopic colon surgery. The secondary objective is to verify that suppression of  
7  
8 113 overactivation of the innate immune system and reduction of the inflammatory response are the  
9  
10 114 mechanisms underlying the ability of pretreatment of percutaneous acupuncture to prevent POI.

11  
12 115 ***Study location***

13  
14 116 A prospective, single-center, double-blinded, randomized, controlled trial will be conducted at  
15  
16 117 Shuguang Hospital, which is affiliated to the Shanghai University of Traditional Chinese  
17  
18 118 Medicine, China.

19  
20 119 ***Study population***

21  
22 120 Participants will be recruited according to the inclusion and exclusion criteria.

23  
24 121 **Inclusion criteria**

- 25  
26 122 1. Male and female patients aged 18–75 years  
27  
28 123 2. Patients undergoing elective laparoscopic colonic surgery and upper rectal resection (such  
29  
30 124 as left colectomy, right colectomy, and anterior resection of the upper part of the rectum  
31  
32 125 and lower part of the sigmoid)  
33  
34 126 3. Body mass index (BMI) 18–31 kg/m<sup>2</sup>  
35  
36 127 4. ASA classification I–III  
37  
38 128 5. Patients provide signed informed consent (the consent form can be viewed in online  
39  
40 129 supplementary appendix 1.)

41  
42 130 **Exclusion criteria**

- 43  
44 131 1. Middle and lower rectal resection, total/proctocolectomy or the need for complex  
45  
46 132 endoscopic surgery  
47  
48 133 2. Need for abdominal wall fistula, gastrointestinal fistula, fistula surgery or stoma creation  
49  
50 134 3. History of abdominal/pelvic operations or complications  
51  
52 135 4. Patients receiving epidural anesthesia or epidural analgesia  
53  
54 136 5. Patients with skin infections, surgical incision or scar at the point of application of  
55  
56 137 acupuncture  
57  
58 138 6. Patients have a history of limb surgery, spinal surgery or nerve injury  
59  
60



- 1  
2  
3  
4 139 7. Patients who participated in other clinical trials, or received other acupuncture therapy, in  
5  
6 140 the previous four weeks  
7  
8 141 8. Patients with cardiac pacemakers  
9  
10 142 9. Patients have one of the following conditions before surgery: chronic pain, drug  
11  
12 143 addiction or alcohol dependence  
13  
14 144 10. Patients with preoperative combination of severe central nervous system disease and  
15  
16 145 severe mental illness

17  
18 146 **Endpoints**

19  
20 147 **Primary endpoint**

21  
22 148 First defecation time (h) i.e., time to first anal defecation after laparoscopic surgery.

23  
24 149 **Secondary endpoints**

25  
26 150 Time to first flatus (h), time to tolerance of solid oral diet (h), GI-2 (composite outcome of time  
27  
28 151 to first defecation and time to tolerance of oral diet), time to walk independently (h), length of  
29  
30 152 hospital stay, defined as number of days from operation to discharge (d). Criteria for hospital  
31  
32 153 discharge include stability of vital signs with no fever, achievement of flatus or defecation,  
33  
34 154 ability to tolerate solid food without vomiting, control of postoperative pain, absence of other  
35  
36 155 postoperative complications and ability to function at home independently or with home care  
37  
38 156 provided. Pain will be assessed using the visual analogue scale (VAS) on postoperative days 1,  
39  
40 157 2 and 3 (scale of 0 to 10, where 0 represents complete absence of pain and 10 represent the  
41  
42 158 worst pain intensity). Postoperative requirements for analgesia will also be assessed.  
43  
44 159 Inflammatory mediators (IFN- $\beta$ , IFN- $\gamma$ , IL-6 and IL-1 $\beta$ ) in blood will be measured before  
45  
46 160 TEAS/STEAS intervention and on days 1, 3 and 5 after the operation. Postoperative  
47  
48 161 complications will be recorded using the Clavien-Dindo classification for complication  
49  
50 162 assessment<sup>24</sup>. The follow-up period will be at least 6 months.

51  
52 163 We add GI-2 as a secondary outcome to the original protocol after recruitment of the study had  
53  
54 164 already begun. GI-2 is a time indicator, which will be calculated from two existing outcomes  
55  
56 165 (time to first defecation and time to tolerance of oral diet). There will be no harm to subjects,  
57  
58 166 no additional cost and no more work.

1  
2  
3  
4 167

5 168 ***Randomization and blinding***

7 169 Patients will be randomized to receive either TEAS or STEAS by stratified randomization  
8  
9 170 according to sex, in a 1:1 ratio (Figure 1). Using a computer-generated random sequence, a  
10  
11 171 sealed envelope will be opened to determine to which group the patient has been assigned. The  
12  
13 172 acupuncturist will be aware of the treatment group. Patients as well as the outcome investigator  
14  
15 173 (nurse anesthetist) , will be blinded to the treatment allocation.  
16

17  
18 174 ***Current sample size justification***

19  
20 175 According to Wang Jian and Song Jiangang's preliminary study of transcutaneous electrical  
21  
22 176 acupoint stimulation pretreatment for prevention of postoperative ileus in patients undergoing  
23  
24 177 laparoscopic colon surgery in Shuguang Hospital, the mean time to first defecation following  
25  
26 178 laparoscopic colon surgery was  $62 \pm 19$  h ( $M \pm SD$ ). Working on the assumption that a clinically  
27  
28 179 meaningful difference in mean time to first defecation between the TEAS and STEAS groups  
29  
30 180 is 1 day or 24 h, 66 patients would be needed in each group to reach a power of 80% and a 5%  
31  
32 181 Type I error rate. If the drop-out rate is 10%, a total sample size of 146 patients for the two  
33  
34 182 groups is needed for this study.  
35

36 183 ***Statistical analysis***

37  
38 184 Data for continuous variables (i.e., first defecation time, first passage of flatus, time to tolerance  
39  
40 185 of oral diet, time to walking independently, length of hospital stay) will be reported using the  
41  
42 186 mean and standard deviation ( $M \pm SD$ ) for normally distributed data or median (range) for  
43  
44 187 skewed data. Data for categorical variables will be expressed as a number (percentage).  
45  
46 188 Intergroup differences will be assessed using the Student's t-test or Mann-Whitney U test.  
47  
48 189 Intergroup differences in inflammatory mediators (at time points of pre-TEAS/STEAS  
49  
50 190 treatment, and on post-operative days 1, 3, and 5) were assessed by two-way repeated measures  
51  
52 191 analysis of variance with Bonferroni post hoc test. The significance level will be set at 5%. All  
53  
54 192 data will be analyzed using SPSS 17.0 software or other appropriate statistical software  
55  
56 193 packages.  
57

58 194 ***Pretreatment***

1  
2  
3  
4 195 Patients randomized to the TEAS and STEAS groups will undergo two treatment sessions daily  
5  
6 196 for three consecutive days before surgery. The patients will then be treated for a final time 30  
7  
8 197 minutes before anesthesia.

9  
10 198 For patients in the TEAS group, the Zusanli (ST-36), Shangjuxu (ST-37), Hegu (LI-4) and  
11  
12 199 Neiguan (P-6) acupoints will be identified before electrical stimulation with surface electrodes  
13  
14 200 (Figure 2). Selection of these acupoints is based on a consensus between the acupuncturists  
15  
16 201 carrying out the study. The acupuncturist will stimulate these acupoints using a Han's acupoint  
17  
18 202 nerve stimulator (HANS200A, Nanjing Jisheng Medical Technology Co., Ltd., Nanjing, China),  
19  
20 203 at a frequency of 100 Hz. The intensity will be adjusted for each individual to maintain a slight  
21  
22 204 twitching of the regional muscle and achieve De-Qi sensations, such as soreness, numbness,  
23  
24 205 distention and heaviness. The STEAS group will receive a strong, but comfortable current for  
25  
26 206 30 s, and the current will then gradually vanish over the next 15 s<sup>25</sup>. The participants of both  
27  
28 207 groups will be told that they are receiving current stimulation. Each session of acupoints  
29  
30 208 treatment will last for 30 min. During the application of TEAS, patients will be required not to  
31  
32 209 change the current settings themselves. A prompt beep at the end of TEAS will indicate the end  
33  
34 210 of treatment.

35  
36 211 All surgery will be carried out under general anesthesia, using standardized anesthetic  
37  
38 212 procedures. Patients will be fasted for 12 h before surgery. Right upper extremity venous access  
39  
40 213 will be established before the patients entering the operating theater. Ringer's lactate solution  
41  
42 214 (8 mL/kg) will be administered by intravenous infusion for compensatory expansion before  
43  
44 215 induction of anesthesia. Patients will then receive midazolam (0.04 mg/kg), fentanyl (3 µg/kg),  
45  
46 216 vecuronium bromide (0.1 mg/kg) and propofol (1.5–2.0 mg/kg) intravenously for induction of  
47  
48 217 anesthesia. Anesthesia will be maintained using a CP-600 anesthesia delivery system (Slgo  
49  
50 218 Medical Technology Co., Ltd., Beijing, China). The dose of propofol will be adjusted to  
51  
52 219 maintain the bispectral index (BIS) in the range 40–60. After surgery, all patients will remain  
53  
54 220 in the post anesthesia care unit and then return to the ward for recovery until discharge.  
55  
56  
57  
58  
59  
60

1  
2  
3  
4 221 The perioperative management of all patients will be standardized. Early ambulation will be  
5  
6 222 encouraged and oral feeding will be resumed as early as possible. All patients will be followed-  
7  
8 223 up for at least 6 months after discharge from the hospital.

9  
10 224 ***Adverse events***

11 225 All adverse reactions will be closely monitored through spontaneous reports by patients or  
12  
13 226 direct observation by clinicians, or by asking the patients about adverse events using open  
14  
15 227 questions. All adverse reactions will be recorded and appropriate treatment will be provided if  
16  
17 228 necessary. Serious adverse events will be reported to the ethics committee.

19  
20 229 ***Data collection and management***

21  
22 230 Demographic variables and clinical data will be collected from all patients. During the study,  
23  
24 231 blood pressure, heart rate and oxygen saturation will also be monitored. Any adverse events  
25  
26 232 will be recorded. Data will be collected throughout the study and will be securely managed  
27  
28 233 under conditions of confidentiality. Data collection will be performed by a nurse anesthetist.  
29  
30 234 The participants will be referred to by their participant number rather than by their name  
31  
32 235 throughout the study, unless otherwise specified. All relevant documents and files will be  
33  
34 236 archived for 5 years. The data will be accessible only by investigators who sign the confidential  
35  
36 237 disclosure agreement and by institutional or governmental auditors during the study. Data  
37  
38 238 without patient identifiers will be publicly accessible after the study. Data collection and  
39  
40 239 management will be monitored by the Institutional Ethics Committee for Clinical Research of  
41  
42 240 Shuguang Hospital.

43  
44 241 ***Patient and public involvement***

45  
46 242 This study is currently in the recruitment phase. Patients and/or public were not involved in  
47  
48 243 study design or conduct of the study. The participants will be able to access the study results  
49  
50 244 through social media.

51  
52 245 ***Discussion***

53  
54 246 POI continues to represent an important cause of morbidity following colon surgery. The  
55  
56 247 prevention of POI is thus of great importance in reducing perioperative complications and  
57  
58 248 reducing hospitalization costs. Although it has been shown that EA can shorten the duration of  
59  
60

1  
2  
3  
4 249 POI<sup>18</sup>, the effectiveness of TEAS, which is a similar technique, in preventing POI has not been  
5  
6 250 investigated. It is, therefore, important to assess the effectiveness of TEAS in preventing POI  
7  
8 251 through a clinical study.

9  
10 252 This study has several strengths. Firstly, the intervention strategy of the protocol will be  
11  
12 253 pretreatment with TEAS. Previous studies have shown that pretreatment has a prophylactic  
13  
14 254 effect. For example, pretreatment with TEAS has been shown to improve pain treatment<sup>26,27</sup>  
15  
16 255 and to improve resuscitation after anesthesia, with reduction of postoperative nausea and  
17  
18 256 vomiting<sup>28</sup>. It is, however, unclear whether preoperative TEAS can prevent POI. Studies  
19  
20 257 suggest that early preoperative intervention may be more beneficial in regulating physiological  
21  
22 258 functions and preventing POI<sup>29</sup>. In an extension to these findings, the present study will help to  
23  
24 259 determine whether TEAS pretreatment could improve POI.

25  
26 260 Secondly, the effectiveness of TEAS will be evaluated by assessing clinical function and by  
27  
28 261 serological examination. In this randomized controlled trial of patients undergoing laparoscopic  
29  
30 262 colorectal surgery, our aim is to assess the effects of preoperative TEAS on POI using relevant  
31  
32 263 clinical parameters associated with bowel function. These include time to first defecation, time  
33  
34 264 to first flatus, time to tolerance of oral diet and GI-2. Importantly, we will also measure serum  
35  
36 265 concentrations of inflammatory mediators associated with POI, such as IFN- $\beta$ , IFN- $\gamma$ , IL-6 and  
37  
38 266 IL-1 $\beta$ . Our findings may, thus, provide deeper insights into the mechanisms by which TEAS  
39  
40 267 improves POI.

41  
42 268 There are also limitations to this protocol. Various clinical indicators have been used in studies  
43  
44 269 for the diagnosis of POI, but there is no consensus on which clinical parameter is the best for  
45  
46 270 assessment of gastrointestinal (GI) transit<sup>9,30,31</sup>. Two indicators that are widely used to assess  
47  
48 271 bowel movement will be used in this study. Time to first defecation will be the primary outcome  
49  
50 272 and time to first flatus will be one of the secondary outcomes. There is a possibility that we  
51  
52 273 may observe conflicting results (i.e., significant improvement in time to flatus, but not  
53  
54 274 defecation). Because flatus can vary considerably between patients, clinical trials support the  
55  
56 275 time to tolerance of oral diet and GI-2 (defined as the later of the following two events: time to  
57  
58 276 first tolerance of solid food and time to first bowel movement) as supplementary

1  
2  
3  
4 277 secondary outcomes to measure the recovery time of GI function and these will be used in this  
5  
6 278 study<sup>32,33</sup>. Other limitations of these indicators are that they require objective measurement of  
7  
8 279 motility and are time consuming to measure<sup>34,35</sup>. Recently, this situation has been improved by  
9  
10 280 the use of in vivo monitoring techniques to assess the function of gastrointestinal movements.  
11  
12 281 Innovative devices, such as Sitz markers, have been used to evaluate postoperative recovery of  
13  
14 282 small bowel movement by counting the number of Sitz markers that did not pass through the  
15  
16 283 ileocecal valve, but remained in the small intestine using radiography<sup>36</sup>. The SmartPill is a  
17  
18 284 swallowable device that record parameters within the GI tract. Indicators, such as pH,  
19  
20 285 temperature and intracavitary pressure, can be collected to analyze gastrointestinal transit times  
21  
22 286 in vivo<sup>37</sup>. These devices acquire objective parameters to evaluate bowel movement and could  
23  
24 287 save time. Research into the satisfaction of both doctors and patients with these device needs  
25  
26 288 to be carried out. Furthermore, this study is a single-center trial and, because the therapeutic  
27  
28 289 effect of TEAS may be affected by ethnicity and region, it will be necessary to conduct multi-  
29  
30 290 center and large sample studies in the future.  
31  
32 291 Notwithstanding its limitations, this study can clearly indicate the overall effects of TEAS on  
33  
34 292 postoperative recovery. We hypothesize that pretreatment with TEAS could improve recovery  
35  
36 293 of gastrointestinal function in patients undergoing laparoscopic surgery. If this study provides  
37  
38 294 positive results, it will be possible to recommend this pretreatment strategy for patients  
39  
40 295 undergoing abdominal surgery. Relevant cost-effectiveness studies are also worthy of  
41  
42 296 consideration.

#### 43 44 297 ***Acknowledgements***

45  
46 298 We thank Dr. Stanley Tao from Shanghai Ruihui Biotech for his valuable assistance in the  
47  
48 299 statistical design of this study.

#### 49 50 300 ***Funding***

51  
52 301 The present study is supported by the project of the National Natural Science Foundation of  
53  
54 302 China (No. 81703898, 81603702, 81603700 and 81774108) and the commercial sponsorship  
55  
56 303 of SINCH Pharmaceuticals Tech. Co., Ltd.

#### 57 58 304 ***Availability of data and materials***

1  
2  
3  
4 305 The dataset to be generated during the study will be available from the corresponding author  
5  
6 306 on reasonable request via email.

7  
8 307 ***Author contributions***

9  
10 308 Jian Wang conceived the study. Dong-li Li, Wei Tang, Jun Guo and Guo-qiang Fu participated  
11  
12 309 in its design and coordination. Wen-ting Chen, Yue Yong, Wei Song and Jun Guo collected  
13  
14 310 references and developed the protocol. Gui-jie Yu and Lan Yuan will perform statistical  
15  
16 311 analyses. Rui Feng will follow-up with patients and record data. Jian Wang, Li-hua Fan and  
17  
18 312 Jian-gang Song drafted the manuscript. All authors have read and approved the final manuscript.

19  
20 313 ***Competing interests***

21  
22 314 None declared.  
23  
24  
25  
26  
27  
28  
29  
30  
31  
32  
33  
34  
35  
36  
37  
38  
39  
40  
41  
42  
43  
44  
45  
46  
47  
48  
49  
50  
51  
52  
53  
54  
55  
56  
57  
58  
59  
60

316 **References**

- 317 1. Iyer S, Saunders WB, Stemkowski S. Economic burden of postoperative  
318 ileus associated with colectomy in the United States. *J Manag*  
319 *Care Pharm* 2009;15(6):485–94. doi: 10.18553/jmcp.2009.15.6.485
- 320 2. Boelens PG, Heesakkers FF, Luyer MD, et al. Reduction of  
321 postoperative ileus by early enteral nutrition in patients  
322 undergoing major rectal surgery: prospective, randomized,  
323 controlled trial. *Ann Surg* 2014;259(4):649–55. doi:  
324 10.1097/SLA.000000000000288
- 325 3. Melis M, Fichera A, Ferguson MK. Bowel necrosis associated with  
326 early jejunal tube feeding: A complication of postoperative  
327 enteral nutrition. *Arch Surg* 2006;141(7):701–4. doi:  
328 10.1001/archsurg.141.7.701
- 329 4. Moghadamyeghaneh Z, Hwang GS, Hanna MH, et al. Risk factors for  
330 prolonged ileus following colon surgery. *Surg Endosc*  
331 2016;30(2):603–09. doi: 10.1007/s00464-015-4247-1
- 332 5. Goldstein JL, Matuszewski KA, Delaney CP, et al. Inpatient economic  
333 burden of postoperative ileus associated with abdominal surgery  
334 in the United States. *P and T* 2007;32(2):82–90.
- 335 6. Bragg D, El-Sharkawy AM, Psaltis E, et al. Postoperative ileus:  
336 Recent developments in pathophysiology and management. *Clin Nutr*  
337 2015;34(3):367–76. doi: 10.1016/j.clnu.2015.01.016
- 338 7. Wolthuis AM, Bislenghi G, Fieuids S, et al. Incidence of prolonged  
339 postoperative ileus after colorectal surgery: a systematic  
340 review and meta-analysis. *Colorectal Dis* 2016;18(1):01–9. doi:  
341 10.1111/codi.13210
- 342 8. Nguyen DL, Maithel S, Nguyen ET, et al. Does Alvimopan enhance  
343 return of bowel function in laparoscopic gastrointestinal  
344 surgery? A meta-analysis. *Annals of Gastroenterology*  
345 2015;28(4):475–80.
- 346 9. van Bree SH, Nemethova A, Cailotto C, et al. New therapeutic  
347 strategies for postoperative ileus. *Nat Rev Gastroenterol*  
348 *Hepatol* 2012;9(11):675–83. doi: 10.1038/nrgastro.2012.134
- 349 10. Hilton WM, Lotan Y, Parekh DJ, et al. Alvimopan for prevention of  
350 postoperative paralytic ileus in radical cystectomy patients: a  
351 cost-effectiveness analysis. *BJU Int* 2013;111(7):1054–60. doi:  
352 10.1111/j.1464-410X.2012.11499.x
- 353 11. Wehner S, Behrendt FF, Lyutenski BN, et al. Inhibition of  
354 macrophage function prevents intestinal inflammation and  
355 postoperative ileus in rodents. *Gut* 2007;56(2):176–85. doi:  
356 10.1136/gut.2005.089615



- 1  
2  
3 357 12. Wehner S, Straesser S, Vilz TO, et al. Inhibition of p38 mitogen-  
4 358 activated protein kinase pathway as prophylaxis of postoperative  
5 359 ileus in mice. *Gastroenterology* 2009;136(2):619-29. doi:  
6 360 10.1053/j.gastro.2008.10.017  
7  
8 361 13. Schwarz NT, Kalff JC, Turler A, et al. Prostanoid production via  
9 362 COX-2 as a causative mechanism of rodent postoperative ileus.  
10 363 *Gastroenterology* 2001;121(6):1354-71. doi:  
11 364 10.1053/gast.2001.29605  
12  
13 365 14. Engel DR, Koscielny A, Wehner S, et al. T helper type 1 memory  
14 366 cells disseminate postoperative ileus over the entire intestinal  
15 367 tract. *Nat Med* 2010;16(12):1407-13. doi: 10.1038/nm.2255  
16  
17 368 15. Adding LC, Bannenberg GL, Gustafsson LE. Basic experimental studies  
18 369 and clinical aspects of gadolinium salts and chelates. *Cardiovasc*  
19 370 *Drug Rev* 2001;19(1):41-56. doi: 10.1111/j.1527-  
20 371 3466.2001.tb00182.x  
21  
22 372 16. Koscielny A, Kalff JC. T-helper cell type 1 memory cells and  
23 373 postoperative ileus in the entire gut. *Curr Opin Gastroenterol*  
24 374 2011;27(6):509-14. doi: 10.1097/MOG.0b013e32834bb7d7  
25  
26 375 17. Mikkelsen HB, Thuneberg L. Op/op mice defective in production of  
27 376 functional colony-stimulating factor-1 lack macrophages in  
28 377 muscularis externa of the small intestine. *Cell Tissue Res*  
29 378 1999;295(3):485-93. doi: 10.1007/s004410051254  
30  
31 379 18. Ng SS, Leung WW, Mak TW, et al. Electroacupuncture reduces duration  
32 380 of postoperative ileus after laparoscopic surgery for colorectal  
33 381 cancer. *Gastroenterology* 2013;144(2):307-13 e1. doi:  
34 382 10.1053/j.gastro.2012.10.050  
35  
36 383 19. You XM, Mo XS, Ma L, et al. Randomized Clinical Trial Comparing  
37 384 Efficacy of Simo Decoction and Acupuncture or Chewing Gum Alone  
38 385 on Postoperative Ileus in Patients With Hepatocellular Carcinoma  
39 386 After Hepatectomy. *Medicine (Baltimore)* 2015;94(45):e1968. doi:  
40 387 10.1097/MD.0000000000001968  
41  
42 388 20. Song JG, Li HH, Cao YF, et al. Electroacupuncture improves survival  
43 389 in rats with lethal endotoxemia via the autonomic nervous system.  
44 390 *Anesthesiology* 2012;116(2):406-14. doi:  
45 391 10.1097/ALN.0b013e3182426ebd  
46  
47 392 21. Zhang J, Yong Y, Li X, et al. Vagal modulation of high mobility  
48 393 group box-1 protein mediates electroacupuncture-induced  
49 394 cardioprotection in ischemia-reperfusion injury. *Sci Rep*  
50 395 2015;5:15503. doi: 10.1038/srep15503  
51  
52 396 22. Balogun JA, Biasci S, Han L. The effects of acupuncture,  
53 397 electroneedling and transcutaneous electrical stimulation

- 1  
2  
3 398 therapies on peripheral haemodynamic functioning. *Disabil Rehabil* 1998;20(2):41-8. doi: 10.3109/09638289809166052
- 4 399
- 5 400 23. Jiang Y, Wang H, Liu Z, et al. Manipulation of and sustained effects
- 6 401 on the human brain induced by different modalities of acupuncture:
- 7 402 an fMRI study. *PLoS One* 2013;8(6):e66815. doi:
- 8 403 10.1371/journal.pone.0066815
- 9 404 24. Dindo D, Demartines N, Clavien PA. Classification of surgical
- 10 405 complications: a new proposal with evaluation in a cohort of 6336
- 11 406 patients and results of a survey. *Ann Surg* 2004;240(2):205-13.
- 12 407 doi: 10.1097/01.sla.0000133083.54934.ae
- 13 408 25. Rakel B, Cooper N, Adams HJ, et al. A new transient sham TENS
- 14 409 device allows for investigator blinding while delivering a true
- 15 410 placebo treatment. *J Pain* 2010;11(3):230-8. doi:
- 16 411 10.1016/j.jpain.2009.07.007
- 17 412 26. Huang L, Pan Y, Chen S, et al. Prevention of propofol injection-
- 18 413 related pain using pretreatment transcutaneous electrical
- 19 414 acupoint stimulation. *Turk J Med Sci* 2017;47(4):1267-76. doi:
- 20 415 10.3906/sag-1611-35
- 21 416 27. Zhang Q, Gao Z, Wang H, et al. The effect of pre-treatment with
- 22 417 transcutaneous electrical acupoint stimulation on the quality of
- 23 418 recovery after ambulatory breast surgery: a prospective,
- 24 419 randomised controlled trial. *Anaesthesia* 2014;69(8):832-9. doi:
- 25 420 10.1111/anae.12639
- 26 421 28. Zheng LH, Sun H, Wang GN, et al. Effect of transcutaneous electrical
- 27 422 acupoint stimulation on nausea and vomiting induced by patient
- 28 423 controlled intravenous analgesia with tramadol. *Chin J Integr*
- 29 424 *Med* 2008;14(1):61-4. doi: 10.1007/s11655-007-9006
- 30 425 29. Stakenborg N, Labeeuw E, Gomez-Pinilla PJ, et al. Preoperative
- 31 426 administration of the 5-HT4 receptor agonist prucalopride
- 32 427 reduces intestinal inflammation and shortens postoperative ileus
- 33 428 via cholinergic enteric neurons. *Gut* 2019;68(8):1406-16. doi:
- 34 429 10.1136/gutjnl-2018-317263
- 35 430 30. Vather R, Trivedi S, Bissett I. Defining postoperative ileus:
- 36 431 results of a systematic review and global survey. *J Gastrointest*
- 37 432 *Surg* 2013;17(5):962-72. doi: 10.1007/s11605-013-2148-y
- 38 433 31. Wu Z, Boersema GS, Dereci A, et al. Clinical endpoint, early
- 39 434 detection, and differential diagnosis of postoperative ileus: a
- 40 435 systematic review of the literature. *Eur Surg Res* 2015;54(3-
- 41 436 4):127-38. doi: 10.1159/000369529
- 42 437 32. Deng G, Wong WD, Guillem J, et al. A phase II, randomized,
- 43 438 controlled trial of acupuncture for reduction of Postcolectomy

- 1  
2  
3 439 Ileus. *Annals of surgical oncology* 2013;20(4):1164 - 69. doi:  
4 440 10.1245/s10434-012-2759-7
- 5  
6 441 33. van Bree SH, Bemelman WA, Hollmann MW, et al. Identification of  
7 442 clinical outcome measures for recovery of gastrointestinal  
8 443 motility in postoperative ileus. *Ann Surg* 2014;259(4):708-14.  
9 444 doi: 10.1097/SLA.0b013e318293ee55
- 10  
11 445 34. Maffezzini M, Campodonico F, Canepa G, et al. Current perioperative  
12 446 management of radical cystectomy with intestinal urinary  
13 447 reconstruction for muscle-invasive bladder cancer and reduction  
14 448 of the incidence of postoperative ileus. *Surg Oncol*  
15 449 2008;17(1):41-8. doi: 10.1016/j.suronc.2007.09.003
- 16  
17 450 35. Bungard TJ, Kale-Pradhan PB. Prokinetic agents for the treatment  
18 451 of postoperative ileus in adults: a review of the literature.  
19 452 *Pharmacotherapy* 1999;19(4):416-23. doi:  
20 453 10.1592/phco.19.6.416.31040
- 21  
22 454 36. Chae HD, Kwak MA, Kim IH. Effect of Acupuncture on Reducing Duration  
23 455 of Postoperative Ileus After Gastrectomy in Patients with Gastric  
24 456 Cancer: a Pilot Study Using Sitz Marker. *Journal of alternative*  
25 457 *and complementary medicine (new york, NY)* 2016;22(6):465 - 72.  
26 458 doi: 10.1089/acm.2015.0161
- 27  
28 459 37. Vilz TO, Pantelis D, Lingohr P, et al. SmartPill® as an objective  
29 460 parameter for determination of severity and duration of  
30 461 postoperative ileus: study protocol of a prospective, two-arm,  
31 462 open-label trial (the PIDuSA study). *Bmj Open* 2016;6(7):e011014.

463

464

#### 465 **Figure Legend**

466 Figure 1. Flow chart of the study protocol

467 Figure 2. Acupoints selected in this trial (a) Hegu (IL-4) and Neiguan (P-6); (b) Zusanli (ST-

468 36) and Shangjuxu (ST-37); (c) Han's acupoint nerve stimulator

469

470

471

472



Figure 1. Flow chart of the study

177x109mm (300 x 300 DPI)

1  
2  
3  
4  
5  
6  
7  
8  
9  
10  
11  
12  
13  
14  
15  
16  
17  
18  
19  
20  
21  
22  
23  
24  
25  
26  
27  
28  
29  
30  
31  
32  
33  
34  
35  
36  
37  
38  
39  
40  
41  
42  
43  
44  
45  
46  
47  
48  
49  
50  
51  
52  
53  
54  
55  
56  
57  
58  
59  
60

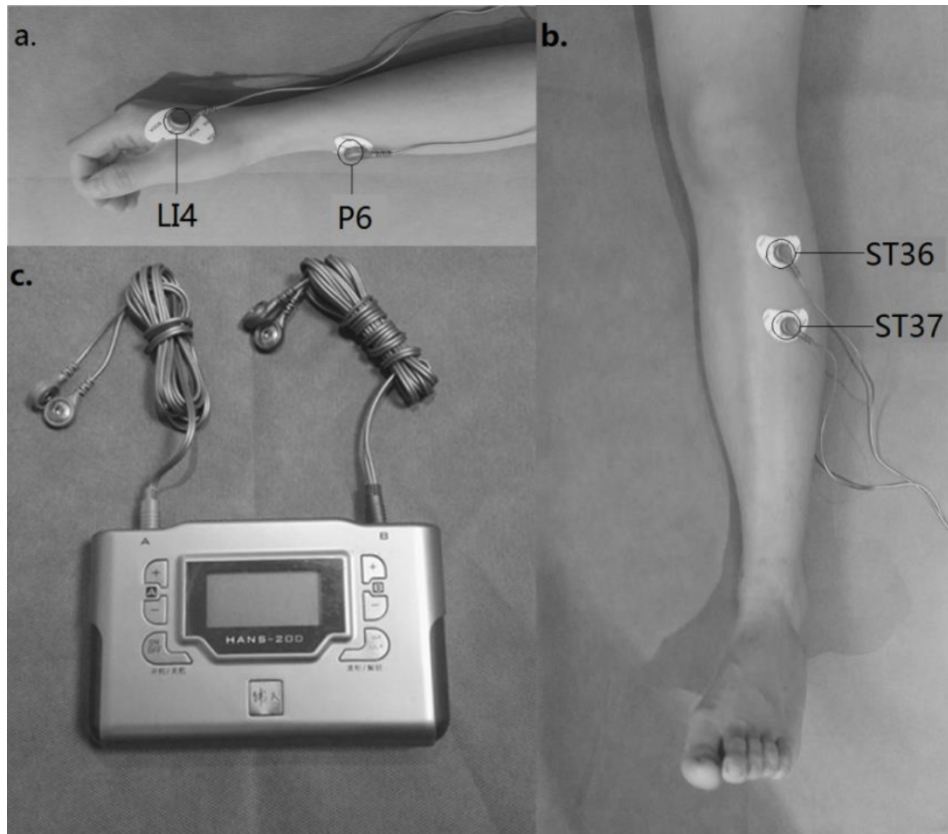

Figure 2. Acupoints selected in this trial. (a) shows Hegu (LI-4), Neiguan (P-6). (b) shows Zusanli (ST-36), Shangjuxu (ST-37). (c) Han's acupoint nerve stimulator.

103x87mm (300 x 300 DPI)

## Informed consent • informed consent page

Dear Mr/Miss,

We will invite you to participate in a study, this study is supported by the project of the National Natural Science Foundation of China (No. 81703898, 81603702, 81603700 and 81774108) and the commercial sponsorship of SINCH Pharmaceuticals Tech. Co., Ltd. This study protocol has been reviewed by the Chinese Registered Clinical Trial Ethics Review Committee (NO.ChiECRCT-20170084) and approved for clinical study.

Before you decide whether or not to participate in this study, please read the following as carefully as possible. It will help you understand the study and why it was conducted, the procedures and duration of the study, and the benefits, risks and discomfort that may result from your participation in the study. If you wish, you can also discuss it with your relatives or friends, or ask your doctor for an explanation to help you make a decision.

### **I. Research background and purpose**

#### ***1.1 Disease burden and treatment status***

Postoperative ileus (POI) refers to the stagnation of gastrointestinal propulsion caused by surgical operation after abdominal surgery, which is mainly manifested as abdominal pain, abdominal distension, nausea and vomiting, cessation of exhaust and defecation, and intolerance of solid food.

Postoperative intestinal paralysis is usually temporary, but if the duration of intestinal paralysis is prolonged, it may lead to serious complications such as surgical incision dehiscence, intestinal anastomotic fistula, abdominal infection, intestinal ischemia, and aspiration pneumonia.

A retrospective cohort study of nearly 500 U.S. hospitals showed that postoperative ileus was an important cause of longer hospital stays and higher medical costs for patients undergoing abdominal surgery. The United States spends more than \$1.46 billion annually on treatment for POI. At present, measures used in treating POI mainly include: perioperative rational use of narcotic drugs and opioids, eat early after surgery, avoid to use nasogastric tube after operation, early ambulation, postoperative epidural analgesia, restrict fluid intake, the minimally invasive surgery (such as laparoscopic), drug therapy, chewing gum, etc. However, although there are many treatment measures, they are affected by many factors (such as complicated operation, whether the patient accepts, cost-benefit ratio, surgical conditions, etc.), and the mechanism of POI is complex and far from clear, so the clinical treatment effect is still not ideal.

POI is still a clinical problem that seriously affects patients' postoperative recovery.

Therefore, it is necessary to find more effective, convenient and economical treatment methods.

### ***1.2 purpose of this study***

The purpose of this study is to assess the effect of TEAS on clinical recovery of bowel function after laparoscopic colon surgery and explore the mechanism of TEAS treatment on POI.

## **II. What will be required to participate in the study?**

***1. Before you are enrolled in the study, the doctor will inquire and record your medical history, and perform physical examination, blood routine, urine routine, stool routine, liver function, kidney function and other physical and chemical examinations, as well as 12-lead electrocardiogram.***

You are eligible for inclusion. You may participate in the study voluntarily and sign the informed consent.

If you do not wish to participate in the study, we will treat you as you wish.

***2. If you are willing to participate in the study, you will follow the following steps:***

- **Sign the informed consent**

- **TEAS treatment**

We will provide you with TEAS treatment in 3 consecutive days before surgery, twice a day, each time for 30 minutes, giving another acupoint electrical stimulation treatment for 30 minutes before anesthesia.

- **Clinical test indicators:**

You will need to cooperate to provide the following information, which will be recorded by the researcher

- First defecation time (h) i.e., time to first anal defecation after laparoscopic surgery.
- Time to first flatus (h), time to tolerance of solid oral diet (h), GI-2 (composite outcome of time to first defecation and time to tolerance of oral diet), time to walk independently (h)
- Pain will be assessed using the visual analogue scale (VAS) on postoperative days 1, 2 and 3 (scale of 0 to 10, where 0 represents complete absence of pain and 10 represent the worst pain intensity).
- Inflammatory mediators (IFN- $\beta$ , IFN- $\gamma$ , IL-6 and IL-1 $\beta$ ) in blood will be measured before TEAS/STEAS intervention and on days 1, 3 and 5 after the

1  
2  
3 operation.

- 4 ■ Postoperative complications will be recorded, and the follow-up period will be at  
5 least 6 months.  
6  
7

### 8 **3. Clinical safety evaluation:** 9

10 Patients were assessed for clinical safety by spontaneous reporting, direct observation  
11 by clinicians, or by non-inductive questioning about adverse events.  
12  
13

#### 14 ● **Quality control during operation and anesthesia:** 15

16 All surgery will be carried out under general anesthesia, using standardized anesthetic  
17 procedures. After surgery, all patients will remain in the post anesthesia care unit and  
18 then return to the ward for recovery until discharge. The perioperative management of  
19 all patients will be standardized.  
20  
21  
22

- #### 23 ● **Postoperative complications will be recorded, and the follow-up period will 24 be at least 6 months.** 25 26

27 Other matters requiring your cooperation

28 You must come to the hospital according to the follow-up time agreed by the doctor  
29 and you (generally medical records, personal treatment diary card, etc.).  
30

31 Your follow-up is important because your doctor will determine whether the treatment  
32 you receive is truly effective and will guide you in a timely manner.  
33  
34

### 35 **III. Potential benefits of participating in the study** 36

37 Although there is evidence that transcutaneous electrical acupoint stimulation has a  
38 satisfactory effect, it is not guaranteed to be effective for you.

39 The percutaneous electrical stimulation of acupoints used in this study is not the only  
40 method for the treatment of postoperative intestinal paralysis.  
41

42 If it does not work for you, ask your doctor about alternative treatments that may be  
43 available.  
44  
45  
46

### 47 **IV. Possible adverse reactions, risks, discomfort and inconvenience** 48

49 The transcutaneous electrical acupoint stimulation used in this study has the  
50 advantages of safety, noninvasiveness and small impact on cardiovascular system. No  
51 serious adverse reactions have occurred during the treatment.  
52

53 If you experience any discomfort, illness aggravating or any unexpected  
54 circumstances during the study, whether related to the study or not, you should inform  
55 your doctor in time. He/she will make a judgment on this and give appropriate  
56 medical treatment.  
57  
58

59 During the study, you need to come to the hospital on time for follow-up visits and  
60



1  
2  
3 some examinations, which may take up some of your time and may also cause trouble  
4 or inconvenience to you.  
5

## 6 7 **V. Related expenses** 8

9  
10 The drugs and related tests used in this study are free of charge. If you have any injury  
11 related to this study, the research group will pay your medical expenses. In case of  
12 serious adverse events, the research team will pay compensation according to relevant  
13 national regulations. For other diseases that you combine at the same time, the  
14 treatment and examination required will not be free of charge  
15  
16

## 17 **VI. Confidentiality of personal information** 18

19  
20 Your medical records (study records /CRF, lab notes, etc.) will be kept intact in the  
21 hospital you visit.  
22

23 Your doctor will record the results of tests and other tests on your medical record.  
24 Researchers, ethics committees and drug regulators will be allowed to access your  
25 medical records.  
26

27 Any public report on the results of this study will not disclose your personal identity.  
28 We will make every effort to protect the privacy of your personal medical data to the  
29 extent permitted by law.  
30

31 In accordance with medical research ethics, in addition to personal privacy  
32 information, test data will be available for public inquiry and sharing, which will be  
33 limited to web-based electronic databases, ensuring that no personal privacy  
34 information will be disclosed.  
35  
36

## 37 **VII. How to get more information?** 38

39  
40 You may raise any questions about this study at any time and get the corresponding  
41 answers.  
42

43 If there is any important new information during the study that may affect your  
44 willingness to continue to participate in the study, your doctor will inform you in time.  
45

## 46 **VIII. You may voluntarily participate in the study or withdraw from the study** 47

48  
49 Participation in the study is entirely up to you.

50 You may refuse to participate in the study or withdraw from the study at any time  
51 during the study, which will not affect the relationship between you and the doctor,  
52 nor will it affect your medical treatment or the loss of other benefits.  
53

54 In your best interests, the doctor or researcher may discontinue your participation in  
55 this study at any time during the study.  
56

57 If you withdraw from the study for any reason, you may be asked about the use of the  
58 test drug.  
59

60 You may also be required to have a laboratory and physical examination if your

1  
2  
3 doctor deems it necessary.  
4  
5

6 **IX. What should I do now?**  
7

8 Participation in this study is up to you (and your family).  
9

10 Before you make a decision to participate in the study, please ask your doctor as many  
11 questions as possible. Thank you for reading the material. If you decide to participate  
12 in this study, please tell your doctor that he/she will arrange all matters related to the  
13 study for you. Please keep this information.  
14  
15  
16  
17  
18  
19  
20  
21  
22  
23  
24  
25  
26  
27  
28  
29  
30  
31  
32  
33  
34  
35  
36  
37  
38  
39  
40  
41  
42  
43  
44  
45  
46  
47  
48  
49  
50  
51  
52  
53  
54  
55  
56  
57  
58  
59  
60

For peer review only

### Informed consent

**Clinical study title:** Pretreatment with transcutaneous electrical acupoint stimulation to prevent postoperative ileus in patients undergoing laparoscopic colon surgery: study protocol for a randomized controlled trial

**Project unit:** Shuguang Hospital Affiliated to Shanghai University of Traditional Chinese Medicine

**Project partner:** \_\_\_\_\_

**Project assignment no.:** \_\_\_\_\_

#### Agree with the statement

I have read the above introduction to this study and have the opportunity to discuss and raise questions with my doctor about this study.

All my questions were answered satisfactorily.

I know the possible risks and benefits of participating in this study.

I understand that participation in the study is voluntary and I confirm that I have had sufficient time to consider this and understand that:

- I can consult my doctor for more information at any time.
- I can withdraw from this study at any time without discrimination or retaliation, and my medical treatment and rights and interests will not be affected.

I also know that if I drop out of the study, especially if I drop out of the study due to drugs, if I tell the doctor about my condition change and complete the corresponding physical examination and physical and chemical examination, it will be very beneficial to the whole study.

If I need to take any other medication due to a change in my condition, I will consult my doctor beforehand or tell him the truth afterwards.

I agree with the ethics committee of the drug regulatory agency or the sponsor's representative to access my research materials.

I will receive a copy of the signed and dated informed consent form.

In the end, I decided to agree to participate in this study, and promised to follow the doctor's advice as much as possible.

Patient signature: \_\_\_\_\_ DATE: \_\_\_\_\_(YYYY-MM-DD)

Contact number: \_\_\_\_\_

I confirm that I have explained to the patient the details of this trial, including its rights and possible benefits and risks, and have given it a copy of the signed informed consent.

Signature of doctor: \_\_\_\_\_ DATE: \_\_\_\_\_(YYYY-MM-DD)

Contact number: \_\_\_\_\_



SPIRIT 2013 Checklist for the ReTrain pilot RCT: Recommended items to address in a clinical trial protocol and related documents\*

| Section/item                      | Item No | Description                                                                                                                                                                                                                                                                              | Addressed on page number |
|-----------------------------------|---------|------------------------------------------------------------------------------------------------------------------------------------------------------------------------------------------------------------------------------------------------------------------------------------------|--------------------------|
| <b>Administrative information</b> |         |                                                                                                                                                                                                                                                                                          |                          |
| Title                             | 1       | Descriptive title identifying the study design, population, interventions, and, if applicable, trial acronym                                                                                                                                                                             | _____ 1 _____            |
| Trial registration                | 2a      | Trial identifier and registry name. If not yet registered, name of intended registry                                                                                                                                                                                                     | _____ 2 _____            |
|                                   | 2b      | All items from the World Health Organization Trial Registration Data Set                                                                                                                                                                                                                 | _____ 2 _____            |
| Protocol version                  | 3       | Date and version identifier                                                                                                                                                                                                                                                              | _____ 2 _____            |
| Funding                           | 4       | Sources and types of financial, material, and other support                                                                                                                                                                                                                              | _____ 11 _____           |
| Roles and responsibilities        | 5a      | Names, affiliations, and roles of protocol contributors                                                                                                                                                                                                                                  | _____ 1&11 _____         |
|                                   | 5b      | Name and contact information for the trial sponsor                                                                                                                                                                                                                                       | _____ 11 _____           |
|                                   | 5c      | Role of study sponsor and funders, if any, in study design; collection, management, analysis, and interpretation of data; writing of the report; and the decision to submit the report for publication, including whether they will have ultimate authority over any of these activities | _____ 11 _____           |
|                                   | 5d      | Composition, roles, and responsibilities of the coordinating centre, steering committee, endpoint adjudication committee, data management team, and other individuals or groups overseeing the trial, if applicable (see Item 21a for data monitoring committee)                         | _____ 9 _____            |

|    |                                                           |     |                                                                                                               |               |
|----|-----------------------------------------------------------|-----|---------------------------------------------------------------------------------------------------------------|---------------|
| 1  | <b>Introduction</b>                                       |     |                                                                                                               |               |
| 2  |                                                           |     |                                                                                                               |               |
| 3  | Background and                                            | 6a  | Description of research question and justification for undertaking the trial, including summary of relevant   | _____4&5_____ |
| 4  | rationale                                                 |     | studies (published and unpublished) examining benefits and harms for each intervention                        |               |
| 5  |                                                           |     |                                                                                                               |               |
| 6  |                                                           | 6b  | Explanation for choice of comparators                                                                         | _____         |
| 7  |                                                           |     |                                                                                                               |               |
| 8  | Objectives                                                | 7   | Specific objectives or hypotheses                                                                             | _____5_____   |
| 9  |                                                           |     |                                                                                                               |               |
| 10 | Trial design                                              | 8   | Description of trial design including type of trial (eg, parallel group, crossover, factorial, single group), | _____5_____   |
| 11 |                                                           |     | allocation ratio, and framework (eg, superiority, equivalence, noninferiority, exploratory)                   |               |
| 12 |                                                           |     |                                                                                                               |               |
| 13 |                                                           |     |                                                                                                               |               |
| 14 | <b>Methods: Participants, interventions, and outcomes</b> |     |                                                                                                               |               |
| 15 |                                                           |     |                                                                                                               |               |
| 16 | Study setting                                             | 9   | Description of study settings (eg, community clinic, academic hospital) and list of countries where data will | _____6_____   |
| 17 |                                                           |     | be collected. Reference to where list of study sites can be obtained                                          |               |
| 18 |                                                           |     |                                                                                                               |               |
| 19 | Eligibility criteria                                      | 10  | Inclusion and exclusion criteria for participants. If applicable, eligibility criteria for study centres and  | _____6_____   |
| 20 |                                                           |     | individuals who will perform the interventions (eg, surgeons, psychotherapists)                               |               |
| 21 |                                                           |     |                                                                                                               |               |
| 22 | Interventions                                             | 11a | Interventions for each group with sufficient detail to allow replication, including how and when they will be | _____8&9_____ |
| 23 |                                                           |     | administered                                                                                                  |               |
| 24 |                                                           |     |                                                                                                               |               |
| 25 |                                                           | 11b | Criteria for discontinuing or modifying allocated interventions for a given trial participant (eg, drug dose  | _____         |
| 26 |                                                           |     | change in response to harms, participant request, or improving/worsening disease)                             |               |
| 27 |                                                           |     |                                                                                                               |               |
| 28 |                                                           | 11c | Strategies to improve adherence to intervention protocols, and any procedures for monitoring adherence        | _____         |
| 29 |                                                           |     | (eg, drug tablet return, laboratory tests)                                                                    |               |
| 30 |                                                           |     |                                                                                                               |               |
| 31 |                                                           | 11d | Relevant concomitant care and interventions that are permitted or prohibited during the trial                 | _____         |
| 32 |                                                           |     |                                                                                                               |               |
| 33 | Outcomes                                                  | 12  | Primary, secondary, and other outcomes, including the specific measurement variable (eg, systolic blood       | _____7_____   |
| 34 |                                                           |     | pressure), analysis metric (eg, change from baseline, final value, time to event), method of aggregation (eg, |               |
| 35 |                                                           |     | median, proportion), and time point for each outcome. Explanation of the clinical relevance of chosen         |               |
| 36 |                                                           |     | efficacy and harm outcomes is strongly recommended                                                            |               |
| 37 |                                                           |     |                                                                                                               |               |
| 38 | Participant timeline                                      | 13  | Time schedule of enrolment, interventions (including any run-ins and washouts), assessments, and visits for   | _____7_____   |
| 39 |                                                           |     | participants. A schematic diagram is highly recommended (see Figure)                                          |               |
| 40 |                                                           |     |                                                                                                               |               |
| 41 |                                                           |     |                                                                                                               |               |
| 42 |                                                           |     |                                                                                                               |               |
| 43 |                                                           |     |                                                                                                               |               |
| 44 |                                                           |     |                                                                                                               |               |
| 45 |                                                           |     |                                                                                                               |               |
| 46 |                                                           |     |                                                                                                               |               |

|   |             |    |                                                                                                                                                                                       |             |
|---|-------------|----|---------------------------------------------------------------------------------------------------------------------------------------------------------------------------------------|-------------|
| 1 | Sample size | 14 | Estimated number of participants needed to achieve study objectives and how it was determined, including clinical and statistical assumptions supporting any sample size calculations | _____8_____ |
| 2 |             |    |                                                                                                                                                                                       |             |
| 3 |             |    |                                                                                                                                                                                       |             |
| 4 | Recruitment | 15 | Strategies for achieving adequate participant enrolment to reach target sample size                                                                                                   | _____8_____ |
| 5 |             |    |                                                                                                                                                                                       |             |

### 6 **Methods: Assignment of interventions (for controlled trials)**

#### 7 Allocation:

|    |                    |     |                                                                                                                                                                                                                                                                                                                                                          |             |
|----|--------------------|-----|----------------------------------------------------------------------------------------------------------------------------------------------------------------------------------------------------------------------------------------------------------------------------------------------------------------------------------------------------------|-------------|
| 8  |                    |     |                                                                                                                                                                                                                                                                                                                                                          |             |
| 9  |                    |     |                                                                                                                                                                                                                                                                                                                                                          |             |
| 10 | Sequence           | 16a | Method of generating the allocation sequence (eg, computer-generated random numbers), and list of any factors for stratification. To reduce predictability of a random sequence, details of any planned restriction (eg, blocking) should be provided in a separate document that is unavailable to those who enrol participants or assign interventions | _____7_____ |
| 11 | generation         |     |                                                                                                                                                                                                                                                                                                                                                          |             |
| 12 |                    |     |                                                                                                                                                                                                                                                                                                                                                          |             |
| 13 |                    |     |                                                                                                                                                                                                                                                                                                                                                          |             |
| 14 |                    |     |                                                                                                                                                                                                                                                                                                                                                          |             |
| 15 |                    |     |                                                                                                                                                                                                                                                                                                                                                          |             |
| 16 | Allocation         | 16b | Mechanism of implementing the allocation sequence (eg, central telephone; sequentially numbered, opaque, sealed envelopes), describing any steps to conceal the sequence until interventions are assigned                                                                                                                                                | _____7_____ |
| 17 | concealment        |     |                                                                                                                                                                                                                                                                                                                                                          |             |
| 18 | mechanism          |     |                                                                                                                                                                                                                                                                                                                                                          |             |
| 19 |                    |     |                                                                                                                                                                                                                                                                                                                                                          |             |
| 20 | Implementation     | 16c | Who will generate the allocation sequence, who will enrol participants, and who will assign participants to interventions                                                                                                                                                                                                                                | _____7_____ |
| 21 |                    |     |                                                                                                                                                                                                                                                                                                                                                          |             |
| 22 |                    |     |                                                                                                                                                                                                                                                                                                                                                          |             |
| 23 |                    |     |                                                                                                                                                                                                                                                                                                                                                          |             |
| 24 | Blinding (masking) | 17a | Who will be blinded after assignment to interventions (eg, trial participants, care providers, outcome assessors, data analysts), and how                                                                                                                                                                                                                | _____7_____ |
| 25 |                    |     |                                                                                                                                                                                                                                                                                                                                                          |             |
| 26 |                    |     |                                                                                                                                                                                                                                                                                                                                                          |             |
| 27 |                    | 17b | If blinded, circumstances under which unblinding is permissible, and procedure for revealing a participant's allocated intervention during the trial                                                                                                                                                                                                     | _____7_____ |
| 28 |                    |     |                                                                                                                                                                                                                                                                                                                                                          |             |
| 29 |                    |     |                                                                                                                                                                                                                                                                                                                                                          |             |
| 30 |                    |     |                                                                                                                                                                                                                                                                                                                                                          |             |

### 31 **Methods: Data collection, management, and analysis**

|    |                 |     |                                                                                                                                                                                                                                                                                                                                                                                                              |             |
|----|-----------------|-----|--------------------------------------------------------------------------------------------------------------------------------------------------------------------------------------------------------------------------------------------------------------------------------------------------------------------------------------------------------------------------------------------------------------|-------------|
| 32 |                 |     |                                                                                                                                                                                                                                                                                                                                                                                                              |             |
| 33 | Data collection | 18a | Plans for assessment and collection of outcome, baseline, and other trial data, including any related processes to promote data quality (eg, duplicate measurements, training of assessors) and a description of study instruments (eg, questionnaires, laboratory tests) along with their reliability and validity, if known. Reference to where data collection forms can be found, if not in the protocol | _____9_____ |
| 34 | methods         |     |                                                                                                                                                                                                                                                                                                                                                                                                              |             |
| 35 |                 |     |                                                                                                                                                                                                                                                                                                                                                                                                              |             |
| 36 |                 |     |                                                                                                                                                                                                                                                                                                                                                                                                              |             |
| 37 |                 |     |                                                                                                                                                                                                                                                                                                                                                                                                              |             |
| 38 |                 |     |                                                                                                                                                                                                                                                                                                                                                                                                              |             |
| 39 |                 | 18b | Plans to promote participant retention and complete follow-up, including list of any outcome data to be collected for participants who discontinue or deviate from intervention protocols                                                                                                                                                                                                                    | _____9_____ |
| 40 |                 |     |                                                                                                                                                                                                                                                                                                                                                                                                              |             |
| 41 |                 |     |                                                                                                                                                                                                                                                                                                                                                                                                              |             |
| 42 |                 |     |                                                                                                                                                                                                                                                                                                                                                                                                              |             |

|    |                                 |     |                                                                                                                                                                                                                                                                                                                                       |    |
|----|---------------------------------|-----|---------------------------------------------------------------------------------------------------------------------------------------------------------------------------------------------------------------------------------------------------------------------------------------------------------------------------------------|----|
| 1  | Data management                 | 19  | Plans for data entry, coding, security, and storage, including any related processes to promote data quality (eg, double data entry; range checks for data values). Reference to where details of data management procedures can be found, if not in the protocol                                                                     | 9  |
| 2  |                                 |     |                                                                                                                                                                                                                                                                                                                                       |    |
| 3  |                                 |     |                                                                                                                                                                                                                                                                                                                                       |    |
| 4  |                                 |     |                                                                                                                                                                                                                                                                                                                                       |    |
| 5  | Statistical methods             | 20a | Statistical methods for analysing primary and secondary outcomes. Reference to where other details of the statistical analysis plan can be found, if not in the protocol                                                                                                                                                              | 8  |
| 6  |                                 |     |                                                                                                                                                                                                                                                                                                                                       |    |
| 7  |                                 |     |                                                                                                                                                                                                                                                                                                                                       |    |
| 8  |                                 | 20b | Methods for any additional analyses (eg, subgroup and adjusted analyses)                                                                                                                                                                                                                                                              | 8  |
| 9  |                                 |     |                                                                                                                                                                                                                                                                                                                                       |    |
| 10 |                                 | 20c | Definition of analysis population relating to protocol non-adherence (eg, as randomised analysis), and any statistical methods to handle missing data (eg, multiple imputation)                                                                                                                                                       | 8  |
| 11 |                                 |     |                                                                                                                                                                                                                                                                                                                                       |    |
| 12 |                                 |     |                                                                                                                                                                                                                                                                                                                                       |    |
| 13 |                                 |     |                                                                                                                                                                                                                                                                                                                                       |    |
| 14 | <b>Methods: Monitoring</b>      |     |                                                                                                                                                                                                                                                                                                                                       |    |
| 15 |                                 |     |                                                                                                                                                                                                                                                                                                                                       |    |
| 16 | Data monitoring                 | 21a | Composition of data monitoring committee (DMC); summary of its role and reporting structure; statement of whether it is independent from the sponsor and competing interests; and reference to where further details about its charter can be found, if not in the protocol. Alternatively, an explanation of why a DMC is not needed | 9  |
| 17 |                                 |     |                                                                                                                                                                                                                                                                                                                                       |    |
| 18 |                                 |     |                                                                                                                                                                                                                                                                                                                                       |    |
| 19 |                                 |     |                                                                                                                                                                                                                                                                                                                                       |    |
| 20 |                                 |     |                                                                                                                                                                                                                                                                                                                                       |    |
| 21 |                                 |     |                                                                                                                                                                                                                                                                                                                                       |    |
| 22 |                                 | 21b | Description of any interim analyses and stopping guidelines, including who will have access to these interim results and make the final decision to terminate the trial                                                                                                                                                               | 9  |
| 23 |                                 |     |                                                                                                                                                                                                                                                                                                                                       |    |
| 24 |                                 |     |                                                                                                                                                                                                                                                                                                                                       |    |
| 25 | Harms                           | 22  | Plans for collecting, assessing, reporting, and managing solicited and spontaneously reported adverse events and other unintended effects of trial interventions or trial conduct                                                                                                                                                     | 9  |
| 26 |                                 |     |                                                                                                                                                                                                                                                                                                                                       |    |
| 27 |                                 |     |                                                                                                                                                                                                                                                                                                                                       |    |
| 28 | Auditing                        | 23  | Frequency and procedures for auditing trial conduct, if any, and whether the process will be independent from investigators and the sponsor                                                                                                                                                                                           | 10 |
| 29 |                                 |     |                                                                                                                                                                                                                                                                                                                                       |    |
| 30 |                                 |     |                                                                                                                                                                                                                                                                                                                                       |    |
| 31 |                                 |     |                                                                                                                                                                                                                                                                                                                                       |    |
| 32 | <b>Ethics and dissemination</b> |     |                                                                                                                                                                                                                                                                                                                                       |    |
| 33 |                                 |     |                                                                                                                                                                                                                                                                                                                                       |    |
| 34 | Research ethics approval        | 24  | Plans for seeking research ethics committee/institutional review board (REC/IRB) approval                                                                                                                                                                                                                                             | 2  |
| 35 |                                 |     |                                                                                                                                                                                                                                                                                                                                       |    |
| 36 |                                 |     |                                                                                                                                                                                                                                                                                                                                       |    |
| 37 | Protocol amendments             | 25  | Plans for communicating important protocol modifications (eg, changes to eligibility criteria, outcomes, analyses) to relevant parties (eg, investigators, REC/IRBs, trial participants, trial registries, journals, regulators)                                                                                                      | 10 |
| 38 |                                 |     |                                                                                                                                                                                                                                                                                                                                       |    |
| 39 |                                 |     |                                                                                                                                                                                                                                                                                                                                       |    |
| 40 |                                 |     |                                                                                                                                                                                                                                                                                                                                       |    |
| 41 |                                 |     |                                                                                                                                                                                                                                                                                                                                       |    |
| 42 |                                 |     |                                                                                                                                                                                                                                                                                                                                       |    |

|    |                               |     |                                                                                                                                                                                                                                                                                     |              |
|----|-------------------------------|-----|-------------------------------------------------------------------------------------------------------------------------------------------------------------------------------------------------------------------------------------------------------------------------------------|--------------|
| 1  | Consent or assent             | 26a | Who will obtain informed consent or assent from potential trial participants or authorised surrogates, and how (see Item 32)                                                                                                                                                        | _____6_____  |
| 2  |                               |     |                                                                                                                                                                                                                                                                                     |              |
| 3  |                               |     |                                                                                                                                                                                                                                                                                     |              |
| 4  |                               | 26b | Additional consent provisions for collection and use of participant data and biological specimens in ancillary studies, if applicable                                                                                                                                               | _____6_____  |
| 5  |                               |     |                                                                                                                                                                                                                                                                                     |              |
| 6  |                               |     |                                                                                                                                                                                                                                                                                     |              |
| 7  | Confidentiality               | 27  | How personal information about potential and enrolled participants will be collected, shared, and maintained in order to protect confidentiality before, during, and after the trial                                                                                                | _____9_____  |
| 8  |                               |     |                                                                                                                                                                                                                                                                                     |              |
| 9  |                               |     |                                                                                                                                                                                                                                                                                     |              |
| 10 | Declaration of interests      | 28  | Financial and other competing interests for principal investigators for the overall trial and each study site                                                                                                                                                                       | _____11_____ |
| 11 |                               |     |                                                                                                                                                                                                                                                                                     |              |
| 12 |                               |     |                                                                                                                                                                                                                                                                                     |              |
| 13 | Access to data                | 29  | Statement of who will have access to the final trial dataset, and disclosure of contractual agreements that limit such access for investigators                                                                                                                                     | _____9_____  |
| 14 |                               |     |                                                                                                                                                                                                                                                                                     |              |
| 15 |                               |     |                                                                                                                                                                                                                                                                                     |              |
| 16 | Ancillary and post-trial care | 30  | Provisions, if any, for ancillary and post-trial care, and for compensation to those who suffer harm from trial participation                                                                                                                                                       | _____9_____  |
| 17 |                               |     |                                                                                                                                                                                                                                                                                     |              |
| 18 |                               |     |                                                                                                                                                                                                                                                                                     |              |
| 19 |                               |     |                                                                                                                                                                                                                                                                                     |              |
| 20 | Dissemination policy          | 31a | Plans for investigators and sponsor to communicate trial results to participants, healthcare professionals, the public, and other relevant groups (eg, via publication, reporting in results databases, or other data sharing arrangements), including any publication restrictions | _____2_____  |
| 21 |                               |     |                                                                                                                                                                                                                                                                                     |              |
| 22 |                               |     |                                                                                                                                                                                                                                                                                     |              |
| 23 |                               |     |                                                                                                                                                                                                                                                                                     |              |
| 24 |                               | 31b | Authorship eligibility guidelines and any intended use of professional writers                                                                                                                                                                                                      | _____2_____  |
| 25 |                               |     |                                                                                                                                                                                                                                                                                     |              |
| 26 |                               | 31c | Plans, if any, for granting public access to the full protocol, participant-level dataset, and statistical code                                                                                                                                                                     | _____2_____  |
| 27 |                               |     |                                                                                                                                                                                                                                                                                     |              |
| 28 |                               |     |                                                                                                                                                                                                                                                                                     |              |
| 29 | <b>Appendices</b>             |     |                                                                                                                                                                                                                                                                                     |              |
| 30 |                               |     |                                                                                                                                                                                                                                                                                     |              |
| 31 | Informed consent materials    | 32  | Model consent form and other related documentation given to participants and authorised surrogates                                                                                                                                                                                  | _____NA_____ |
| 32 |                               |     |                                                                                                                                                                                                                                                                                     |              |
| 33 |                               |     |                                                                                                                                                                                                                                                                                     |              |
| 34 | Biological specimens          | 33  | Plans for collection, laboratory evaluation, and storage of biological specimens for genetic or molecular analysis in the current trial and for future use in ancillary studies, if applicable                                                                                      | _____NA_____ |
| 35 |                               |     |                                                                                                                                                                                                                                                                                     |              |
| 36 |                               |     |                                                                                                                                                                                                                                                                                     |              |

\*It is strongly recommended that this checklist be read in conjunction with the SPIRIT 2013 Explanation & Elaboration for important clarification on the items. Amendments to the protocol should be tracked and dated. The SPIRIT checklist is copyrighted by the SPIRIT Group under the Creative Commons [“Attribution-NonCommercial-NoDerivs 3.0 Unported”](https://creativecommons.org/licenses/by-nc-nd/3.0/) license.
